# Supplementary material for: A novel human leiomyoma tissue derived matrix for cell culture studies
Source: Springer Nature journal article supplement (doi:10.1186/s12885-015-1944-z), 2015-12-01
Supplement: MOESM3 [file 9745668]

Table S1. Mass spectrometry results on myogel

|    | <b>Identified Proteins (765)</b>                                                                        | <b>UniProt Accession Number</b> |
|----|---------------------------------------------------------------------------------------------------------|---------------------------------|
| 1  | Myosin-11 OS=Homo sapiens GN=MYH11 PE=1 SV=3                                                            | sp P35749 MYH11_HUMAN           |
| 2  | Isoform 2 of Filamin-A OS=Homo sapiens GN=FLNA                                                          | sp P21333-2 FLNA_HUMAN          |
| 3  | Collagen alpha-1(XII) chain OS=Homo sapiens GN=COL12A1 PE=1 SV=2                                        | sp Q99715 COCA1_HUMAN (+1)      |
| 4  | Serum albumin OS=Homo sapiens GN=ALB PE=1 SV=2                                                          | sp P02768 ALBU_HUMAN            |
| 5  | Talin-1 OS=Homo sapiens GN=TLN1 PE=1 SV=3                                                               | sp Q9Y490 TLN1_HUMAN            |
| 6  | Actin, aortic smooth muscle OS=Homo sapiens GN=ACTA2 PE=1 SV=1                                          | sp P62736 ACTA_HUMAN (+1)       |
| 7  | Collagen alpha-1(XIV) chain OS=Homo sapiens GN=COL14A1 PE=1 SV=3                                        | sp Q05707 COEA1_HUMAN           |
| 8  | Isoform 2 of Collagen alpha-3(VI) chain OS=Homo sapiens GN=COL6A3                                       | sp P12111-2 CO6A3_HUMAN (+1)    |
| 9  | Isoform 1 of Vinculin OS=Homo sapiens GN=VCL                                                            | sp P18206-2 VINC_HUMAN (+1)     |
| 10 | Myosin-9 OS=Homo sapiens GN=MYH9 PE=1 SV=4                                                              | sp P35579 MYH9_HUMAN            |
| 11 | Actin, cytoplasmic 1 OS=Homo sapiens GN=ACTB PE=1 SV=1                                                  | sp P60709 ACTB_HUMAN (+1)       |
| 12 | Isoform 2 of Alpha-actinin-1 OS=Homo sapiens GN=ACTN1                                                   | sp P12814-2 ACTN1_HUMAN (+1)    |
| 13 | Isoform 2 of Filamin-C OS=Homo sapiens GN=FLNC                                                          | sp Q14315-2 FLNC_HUMAN (+1)     |
| 14 | Tenascin OS=Homo sapiens GN=TNC PE=1 SV=3                                                               | sp P24821 TENA_HUMAN            |
| 15 | Desmin OS=Homo sapiens GN=DES PE=1 SV=3                                                                 | sp P17661 DESM_HUMAN            |
| 16 | Isoform 3 of Plectin OS=Homo sapiens GN=PLEC                                                            | sp Q15149-3 PLEC_HUMAN          |
| 17 | Alpha-1-antitrypsin OS=Homo sapiens GN=SERPINA1 PE=1 SV=3                                               | sp P01009 A1AT_HUMAN            |
| 18 | Transgelin OS=Homo sapiens GN=TAGLN PE=1 SV=4                                                           | sp Q01995 TAGL_HUMAN            |
| 19 | Prelamin-A/C OS=Homo sapiens GN=LMNA PE=1 SV=1                                                          | sp P02545 LMNA_HUMAN            |
| 20 | Caldesmon OS=Homo sapiens GN=CALD1 PE=1 SV=3                                                            | sp Q05682 CALD1_HUMAN           |
| 21 | Gelsolin OS=Homo sapiens GN=GSN PE=1 SV=1                                                               | sp P06396 GELS_HUMAN            |
| 22 | Collagen alpha-2(I) chain OS=Homo sapiens GN=COL1A2 PE=1 SV=7                                           | sp P08123 CO1A2_HUMAN           |
| 23 | Collagen alpha-1(VI) chain OS=Homo sapiens GN=COL6A1 PE=1 SV=3                                          | sp P12109 CO6A1_HUMAN           |
| 24 | Serotransferrin OS=Homo sapiens GN=TF PE=1 SV=3                                                         | sp P02787 TRFE_HUMAN            |
| 25 | Vimentin OS=Homo sapiens GN=VIM PE=1 SV=4                                                               | sp P08670 VIME_HUMAN            |
| 26 | Basement membrane-specific heparan sulfate proteoglycan core protein OS=Homo sapiens GN=HSPG2 PE=1 SV=4 | sp P98160 PGBM_HUMAN            |
| 27 | Complement C3 OS=Homo sapiens GN=C3 PE=1 SV=2                                                           | sp P01024 CO3_HUMAN             |
| 28 | Tropomyosin 1 (Alpha), isoform CRA_f OS=Homo sapiens GN=TPM1 PE=2 SV=1                                  | tr Q6ZN40 Q6ZN40_HUMAN          |
| 29 | Isoform 3 of Tenascin-X OS=Homo sapiens GN=TNXB                                                         | sp P22105-3 TENX_HUMAN (+2)     |

|    |                                                                                          |                              |
|----|------------------------------------------------------------------------------------------|------------------------------|
| 30 | Collagen alpha-2(VI) chain OS=Homo sapiens GN=COL6A2 PE=1 SV=4                           | sp P12110 CO6A2_HUMAN        |
| 31 | Keratin, type II cytoskeletal 1 OS=Homo sapiens GN=KRT1 PE=1 SV=6                        | sp P04264 K2C1_HUMAN         |
| 32 | Annexin OS=Homo sapiens GN=ANXA6 PE=2 SV=3                                               | tr A6NN80 A6NN80_HUMAN       |
| 33 | Alpha-actinin-4 OS=Homo sapiens GN=ACTN4 PE=1 SV=2                                       | sp O43707 ACTN4_HUMAN        |
| 34 | Isoform 2 of Tropomyosin beta chain OS=Homo sapiens GN=TPM2                              | sp P07951-2 TPM2_HUMAN       |
| 35 | Heat shock 70 kDa protein 1A/1B OS=Homo sapiens GN=HSPA1A PE=1 SV=5                      | sp P08107 HSP71_HUMAN        |
| 36 | Periostin OS=Homo sapiens GN=POSTN PE=2 SV=1                                             | tr B1ALD8 B1ALD8_HUMAN       |
| 37 | Cytoplasmic dynein 1 heavy chain 1 OS=Homo sapiens GN=DYNC1H1 PE=1 SV=5                  | sp Q14204 DYHC1_HUMAN        |
| 38 | Lumican OS=Homo sapiens GN=LUM PE=1 SV=2                                                 | sp P51884 LUM_HUMAN          |
| 39 | Moesin OS=Homo sapiens GN=MSN PE=1 SV=3                                                  | sp P26038 MOES_HUMAN         |
| 40 | Isoform 2 of Myosin light chain kinase, smooth muscle OS=Homo sapiens GN=MYLK            | sp Q15746-2 MYLK_HUMAN (+3)  |
| 41 | Galectin-1 OS=Homo sapiens GN=LGALS1 PE=1 SV=2                                           | sp P09382 LEG1_HUMAN         |
| 42 | Collagen alpha-1(I) chain OS=Homo sapiens GN=COL1A1 PE=1 SV=5                            | sp P02452 CO1A1_HUMAN        |
| 43 | Laminin subunit gamma-1 OS=Homo sapiens GN=LAMC1 PE=1 SV=3                               | sp P11047 LAMC1_HUMAN        |
| 44 | Alpha-2-macroglobulin OS=Homo sapiens GN=A2M PE=1 SV=3                                   | sp P01023 A2MG_HUMAN         |
| 45 | Ras GTPase-activating-like protein IQGAP1 OS=Homo sapiens GN=IQGAP1 PE=1 SV=1            | sp P46940 IQGA1_HUMAN        |
| 46 | Pyruvate kinase PKM OS=Homo sapiens GN=PKM PE=1 SV=4                                     | sp P14618 KPYM_HUMAN         |
| 47 | Phosphoglucomutase-like protein 5 OS=Homo sapiens GN=PGM5 PE=1 SV=2                      | sp Q15124 PGM5_HUMAN         |
| 48 | Laminin subunit beta-1 OS=Homo sapiens GN=LAMB1 PE=1 SV=2                                | sp P07942 LAMB1_HUMAN (+1)   |
| 49 | Tubulin beta chain OS=Homo sapiens GN=TUBB PE=1 SV=2                                     | sp P07437 TBB5_HUMAN (+1)    |
| 50 | Isoform 17 of Fibronectin OS=Homo sapiens GN=FN1                                         | sp P02751-17 FINC_HUMAN (+5) |
| 51 | Alpha-enolase OS=Homo sapiens GN=ENO1 PE=1 SV=2                                          | sp P06733 ENOA_HUMAN         |
| 52 | Isoform 9 of Sorbin and SH3 domain-containing protein 1 OS=Homo sapiens GN=SORBS1        | sp Q9BX66-9 SRBS1_HUMAN      |
| 53 | ATP synthase subunit beta, mitochondrial OS=Homo sapiens GN=ATP5B PE=1 SV=3              | sp P06576 ATPB_HUMAN         |
| 54 | Isoform LCRMP-4 of Dihydropyrimidinase-related protein 3 OS=Homo sapiens GN=DPYSL3       | sp Q14195-2 DPYL3_HUMAN      |
| 55 | Keratin, type I cytoskeletal 10 OS=Homo sapiens GN=KRT10 PE=1 SV=6                       | sp P13645 K1C10_HUMAN        |
| 56 | Isoform 2 of Clathrin heavy chain 1 OS=Homo sapiens GN=CLTC                              | sp Q00610-2 CLH1_HUMAN (+1)  |
| 57 | Tubulin alpha-1C chain OS=Homo sapiens GN=TUBA1C PE=1 SV=1                               | sp Q9BQE3 TBA1C_HUMAN (+1)   |
| 58 | Keratin, type I cytoskeletal 9 OS=Homo sapiens GN=KRT9 PE=1 SV=3                         | sp P35527 K1C9_HUMAN         |
| 59 | Histone H2A type 1-B/E OS=Homo sapiens GN=HIST1H2AB PE=1 SV=2                            | sp P04908 H2A1B_HUMAN (+7)   |
| 60 | Ig kappa chain C region OS=Homo sapiens GN=IGKC PE=1 SV=1                                | sp P01834 IGKC_HUMAN         |
| 61 | Transforming growth factor-beta-induced protein ig-h3 OS=Homo sapiens GN=TGFBI PE=1 SV=1 | sp Q15582 BGH3_HUMAN (+1)    |
| 62 | Isoform 4 of Myosin-10 OS=Homo sapiens GN=MYH10                                          | sp P35580-4 MYH10_HUMAN      |

|    |                                                                                              |                              |
|----|----------------------------------------------------------------------------------------------|------------------------------|
| 63 | Isoform 3 of Spectrin alpha chain, non-erythrocytic 1 OS=Homo sapiens GN=SPTAN1              | sp Q13813-3 SPTN1_HUMAN (+1) |
| 64 | Ig gamma-1 chain C region OS=Homo sapiens GN=IGHG1 PE=1 SV=1                                 | sp P01857 IGHG1_HUMAN        |
| 65 | Creatine kinase B-type OS=Homo sapiens GN=CKB PE=1 SV=1                                      | sp P12277 KCRB_HUMAN         |
| 66 | Laminin subunit alpha-2 OS=Homo sapiens GN=LAMA2 PE=1 SV=4                                   | sp P24043 LAMA2_HUMAN        |
| 67 | Protein disulfide-isomerase OS=Homo sapiens GN=P4HB PE=1 SV=3                                | sp P07237 PDIA1_HUMAN        |
| 68 | ATP synthase F(0) complex subunit C1, mitochondrial OS=Homo sapiens GN=ATP5G1 PE=2 SV=2      | sp P05496 AT5G1_HUMAN (+7)   |
| 69 | Endoplasmic reticulum protein OS=Homo sapiens GN=HSP90B1 PE=1 SV=1                           | sp P14625 ENPL_HUMAN         |
| 70 | Keratin, type II cytoskeletal 2 epidermal OS=Homo sapiens GN=KRT2 PE=1 SV=2                  | sp P35908 K22E_HUMAN         |
| 71 | Heat shock protein HSP 90-beta OS=Homo sapiens GN=HSP90AB1 PE=1 SV=4                         | sp P08238 HS90B_HUMAN        |
| 72 | Isoform 3 of Fermitin family homolog 2 OS=Homo sapiens GN=FERMT2                             | sp Q96AC1-3 FERM2_HUMAN (+2) |
| 73 | Calponin-1 OS=Homo sapiens GN=CNN1 PE=1 SV=2                                                 | sp P51911 CNN1_HUMAN         |
| 74 | Myosin regulatory light polypeptide 9 OS=Homo sapiens GN=MYL9 PE=1 SV=4                      | sp P24844 MYL9_HUMAN         |
| 75 | Transitional endoplasmic reticulum ATPase OS=Homo sapiens GN=VCP PE=1 SV=4                   | sp P55072 TERA_HUMAN         |
| 76 | Isoform 2 of Glyceraldehyde-3-phosphate dehydrogenase OS=Homo sapiens GN=GAPDH               | sp P04406-2 G3P_HUMAN (+2)   |
| 77 | Cysteine and glycine-rich protein 1 OS=Homo sapiens GN=CSRP1 PE=1 SV=3                       | sp P21291 CSRP1_HUMAN        |
| 78 | Heat shock cognate 71 kDa protein OS=Homo sapiens GN=HSPA8 PE=1 SV=1                         | sp P11142 HSP7C_HUMAN        |
| 79 | Isoform 3 of Palladin OS=Homo sapiens GN=PALLD                                               | sp Q8WX93-3 PALLD_HUMAN (+1) |
| 80 | Ubiquitin-like modifier-activating enzyme 1 OS=Homo sapiens GN=UBA1 PE=1 SV=3                | sp P22314 UBA1_HUMAN         |
| 81 | Peroxidase homolog OS=Homo sapiens GN=PXDN PE=1 SV=2                                         | sp Q92626 PXDN_HUMAN         |
| 82 | Myosin light polypeptide 6 OS=Homo sapiens GN=MYL6 PE=1 SV=2                                 | sp P60660 MYL6_HUMAN (+1)    |
| 83 | Protein low-density lipoprotein receptor-related protein 1 OS=Homo sapiens GN=LRP1 PE=1 SV=2 | sp Q07954 LRP1_HUMAN         |
| 84 | Elongation factor 1-alpha 1 OS=Homo sapiens GN=EEF1A1 PE=1 SV=1                              | sp P68104 EF1A1_HUMAN (+1)   |
| 85 | Isoform 2 of Nidogen-1 OS=Homo sapiens GN=NID1                                               | sp P14543-2 NID1_HUMAN (+1)  |
| 86 | Adenylyl cyclase-associated protein 1 OS=Homo sapiens GN=CAP1 PE=1 SV=5                      | sp Q01518 CAP1_HUMAN         |
| 87 | 78 kDa glucose-regulated protein OS=Homo sapiens GN=HSPA5 PE=1 SV=2                          | sp P11021 GRP78_HUMAN        |
| 88 | 14-3-3 protein zeta/delta OS=Homo sapiens GN=YWHAZ PE=1 SV=1                                 | sp P63104 1433Z_HUMAN        |
| 89 | Ig gamma-3 chain C region OS=Homo sapiens GN=IGHG3 PE=1 SV=2                                 | sp P01860 IGHG3_HUMAN        |
| 90 | Histone H4 OS=Homo sapiens GN=HIST1H4A PE=1 SV=2                                             | sp P62805 H4_HUMAN           |
| 91 | Isoform 2 of Laminin subunit alpha-4 OS=Homo sapiens GN=LAMA4                                | sp Q16363-2 LAMA4_HUMAN (+1) |
| 92 | Profilin-1 OS=Homo sapiens GN=PFN1 PE=1 SV=2                                                 | sp P07737 PROF1_HUMAN        |
| 93 | Prolargin OS=Homo sapiens GN=PRELP PE=1 SV=1                                                 | sp P51888 PRELP_HUMAN        |
| 94 | Isoform Short of Spectrin beta chain, non-erythrocytic 1 OS=Homo sapiens GN=SPTBN1           | sp Q01082-2 SPTB2_HUMAN (+2) |
| 95 | Alpha-1-antichymotrypsin OS=Homo sapiens GN=SERPINA3 PE=1 SV=2                               | sp P01011 AACT_HUMAN (+1)    |

|     |                                                                                                |                              |
|-----|------------------------------------------------------------------------------------------------|------------------------------|
| 96  | Isoform 2 of DNA-dependent protein kinase catalytic subunit OS=Homo sapiens GN=PRKDC           | sp P78527-2 PRKDC_HUMAN (+2) |
| 97  | Neuroblast differentiation-associated protein AHNAK OS=Homo sapiens GN=AHNAK PE=1 SV=2         | sp Q09666 AHNK_HUMAN         |
| 98  | Isoform 2 of Heat shock protein HSP 90-alpha OS=Homo sapiens GN=HSP90AA1                       | sp P07900-2 HS90A_HUMAN (+1) |
| 99  | Ceruloplasmin OS=Homo sapiens GN=CP PE=1 SV=1                                                  | sp P00450 CERU_HUMAN         |
| 100 | Cofilin-1 OS=Homo sapiens GN=CFL1 PE=1 SV=3                                                    | sp P23528 COF1_HUMAN (+1)    |
| 101 | Isoform B2 of Smoothelin OS=Homo sapiens GN=SMTN                                               | sp P53814-5 SMTN_HUMAN (+1)  |
| 102 | Lipoma-preferred partner OS=Homo sapiens GN=LPP PE=1 SV=1                                      | sp Q93052 LPP_HUMAN          |
| 103 | Stress-induced-phosphoprotein 1 OS=Homo sapiens GN=STIP1 PE=1 SV=1                             | sp P31948 STIP1_HUMAN (+2)   |
| 104 | Annexin A5 OS=Homo sapiens GN=ANXA5 PE=1 SV=2                                                  | sp P08758 ANXA5_HUMAN        |
| 105 | Protein disulfide-isomerase A3 OS=Homo sapiens GN=PDIA3 PE=1 SV=4                              | sp P30101 PDIA3_HUMAN (+1)   |
| 106 | Isoform 2 of Tropomyosin alpha-4 chain OS=Homo sapiens GN=TPM4                                 | sp P67936-2 TPM4_HUMAN       |
| 107 | Staphylococcal nuclease domain-containing protein 1 OS=Homo sapiens GN=SND1 PE=1 SV=1          | sp Q7KZF4 SND1_HUMAN         |
| 108 | Antithrombin-III OS=Homo sapiens GN=SERPINC1 PE=1 SV=1                                         | sp P01008 ANT3_HUMAN         |
| 109 | Isoform 2 of Synaptopodin-2 OS=Homo sapiens GN=SYNPO2                                          | sp Q9UMS6-2 SYNP2_HUMAN (+3) |
| 110 | Heterogeneous nuclear ribonucleoprotein U-like protein 2 OS=Homo sapiens GN=HNRNPUL2 PE=1 SV=1 | sp Q1KMD3 HNRL2_HUMAN (+1)   |
| 111 | Apolipoprotein A-I OS=Homo sapiens GN=APOA1 PE=1 SV=1                                          | sp P02647 APOA1_HUMAN        |
| 112 | Histone H2B type 1-J OS=Homo sapiens GN=HIST1H2BJ PE=1 SV=3                                    | sp P06899 H2B1J_HUMAN (+3)   |
| 113 | Isoform 12 of Titin OS=Homo sapiens GN=TTN                                                     | sp Q8WZ42-12 TITIN_HUMAN     |
| 114 | Versican core protein OS=Homo sapiens GN=VCAN PE=1 SV=3                                        | sp P13611 CSPG2_HUMAN        |
| 115 | Lamin-B2 OS=Homo sapiens GN=LMNB2 PE=1 SV=3                                                    | sp Q03252 LMNB2_HUMAN (+1)   |
| 116 | Complement C4-A OS=Homo sapiens GN=C4A PE=1 SV=2                                               | sp P0COL4 CO4A_HUMAN         |
| 117 | Biglycan OS=Homo sapiens GN=BGN PE=1 SV=2                                                      | sp P21810 PGS1_HUMAN (+1)    |
| 118 | WD repeat-containing protein 1 OS=Homo sapiens GN=WDR1 PE=1 SV=4                               | sp O75083 WDR1_HUMAN         |
| 119 | Elongation factor 2 OS=Homo sapiens GN=EEF2 PE=1 SV=4                                          | sp P13639 EF2_HUMAN          |
| 120 | Adipocyte enhancer-binding protein 1 OS=Homo sapiens GN=AEBP1 PE=1 SV=1                        | sp Q8IU7 AEBP1_HUMAN         |
| 121 | X-ray repair cross-complementing protein 6 OS=Homo sapiens GN=XRCC6 PE=1 SV=2                  | sp P12956 XRCC6_HUMAN (+1)   |
| 122 | Rab GDP dissociation inhibitor beta OS=Homo sapiens GN=GDI2 PE=1 SV=2                          | sp P50395 GDIB_HUMAN (+1)    |
| 123 | Calreticulin OS=Homo sapiens GN=CALR PE=1 SV=1                                                 | sp P27797 CALR_HUMAN         |
| 124 | Isoform 2 of Testin OS=Homo sapiens GN=TES                                                     | sp Q9UGI8-2 TES_HUMAN (+1)   |
| 125 | Isoform XA of Plasma membrane calcium-transporting ATPase 4 OS=Homo sapiens GN=ATP2B4          | sp P23634-2 AT2B4_HUMAN (+7) |
| 126 | Microtubule-actin cross-linking factor 1, isoforms 1/2/3/5 OS=Homo sapiens GN=MACF1 PE=2 SV=1  | tr H3BQK9 H3BQK9_HUMAN (+1)  |

|     |                                                                                                                        |                              |
|-----|------------------------------------------------------------------------------------------------------------------------|------------------------------|
| 127 | Isoform 2 of Transketolase OS=Homo sapiens GN=TKT                                                                      | sp P29401-2 TKT_HUMAN (+2)   |
| 128 | Isoform 3 of Vitamin D-binding protein OS=Homo sapiens GN=GC                                                           | sp P02774-3 VTDB_HUMAN (+2)  |
| 129 | POTE ankyrin domain family member I OS=Homo sapiens GN=POTEI PE=3 SV=1                                                 | sp P0CG38 POTEI_HUMAN        |
| 130 | Hemoglobin subunit alpha OS=Homo sapiens GN=HBA1 PE=1 SV=2                                                             | sp P69905 HBA_HUMAN          |
| 131 | Isoform 2 of Heterogeneous nuclear ribonucleoprotein K OS=Homo sapiens GN=HNRNPK                                       | sp P61978-2 HNRPK_HUMAN (+2) |
| 132 | Alpha-parvin OS=Homo sapiens GN=PARVA PE=1 SV=1                                                                        | sp Q9NVD7 PARVA_HUMAN (+1)   |
| 133 | SPARC-like protein 1 OS=Homo sapiens GN=SPARCL1 PE=1 SV=2                                                              | sp Q14515 SPRL1_HUMAN        |
| 134 | X-ray repair cross-complementing protein 5 OS=Homo sapiens GN=XRCC5 PE=1 SV=3                                          | sp P13010 XRCC5_HUMAN        |
| 135 | Immunoglobulin lambda-like polypeptide 5 OS=Homo sapiens GN=IGLL5 PE=2 SV=2                                            | sp B9A064 IGLL5_HUMAN        |
| 136 | Integrin beta-1 OS=Homo sapiens GN=ITGB1 PE=1 SV=2                                                                     | sp P05556 ITB1_HUMAN         |
| 137 | Heat shock-related 70 kDa protein 2 OS=Homo sapiens GN=HSPA2 PE=1 SV=1                                                 | sp P54652 HSP72_HUMAN        |
| 138 | Isoform 2 of Leiomodin-1 OS=Homo sapiens GN=LMOD1                                                                      | sp P29536-2 LMOD1_HUMAN (+1) |
| 139 | Isoform 2 of ATP synthase subunit alpha, mitochondrial OS=Homo sapiens GN=ATP5A1                                       | sp P25705-2 ATPA_HUMAN (+1)  |
| 140 | Peroxiredoxin-6 OS=Homo sapiens GN=PRDX6 PE=1 SV=3                                                                     | sp P30041 PRDX6_HUMAN        |
| 141 | Nucleolin OS=Homo sapiens GN=NCL PE=1 SV=3                                                                             | sp P19338 NUCL_HUMAN         |
| 142 | Serine/threonine-protein phosphatase 2A 65 kDa regulatory subunit A alpha isoform OS=Homo sapiens GN=PPP2R1A PE=1 SV=4 | sp P30153 2AAA_HUMAN (+1)    |
| 143 | Isoform 4 of Four and a half LIM domains protein 1 OS=Homo sapiens GN=FHL1                                             | sp Q13642-4 FHL1_HUMAN (+1)  |
| 144 | Isoform 2 of Fructose-bisphosphate aldolase A OS=Homo sapiens GN=ALDOA                                                 | sp P04075-2 ALDOA_HUMAN (+2) |
| 145 | Isoform 2 of Filamin-B OS=Homo sapiens GN=FLNB                                                                         | sp O75369-2 FLNB_HUMAN (+3)  |
| 146 | Decorin OS=Homo sapiens GN=DCN PE=1 SV=1                                                                               | sp P07585 PGS2_HUMAN         |
| 147 | PDZ and LIM domain protein 7 OS=Homo sapiens GN=PDLIM7 PE=1 SV=1                                                       | sp Q9NR12 PDLI7_HUMAN        |
| 148 | Heat shock protein beta-1 OS=Homo sapiens GN=HSPB1 PE=1 SV=2                                                           | sp P04792 HSPB1_HUMAN        |
| 149 | Heterogeneous nuclear ribonucleoprotein R OS=Homo sapiens GN=HNRNPR PE=1 SV=1                                          | sp O43390 HNRPR_HUMAN        |
| 150 | Laminin subunit alpha-5 OS=Homo sapiens GN=LAMA5 PE=1 SV=8                                                             | sp O15230 LAMA5_HUMAN        |
| 151 | Isoform 3 of Malate dehydrogenase, cytoplasmic OS=Homo sapiens GN=MDH1                                                 | sp P40925-3 MDHC_HUMAN (+1)  |
| 152 | Calnexin OS=Homo sapiens GN=CANX PE=1 SV=2                                                                             | sp P27824 CALX_HUMAN (+1)    |
| 153 | ATP-dependent RNA helicase A OS=Homo sapiens GN=DHX9 PE=1 SV=4                                                         | sp Q08211 DHX9_HUMAN         |
| 154 | EH domain-containing protein 2 OS=Homo sapiens GN=EHD2 PE=1 SV=2                                                       | sp Q9NZN4 EHD2_HUMAN         |
| 155 | Complement factor H OS=Homo sapiens GN=CFH PE=1 SV=4                                                                   | sp P08603 CFAH_HUMAN         |
| 156 | Hemopexin OS=Homo sapiens GN=HPX PE=1 SV=2                                                                             | sp P02790 HEMO_HUMAN         |
| 157 | Phosphoglycerate kinase 1 OS=Homo sapiens GN=PGK1 PE=1 SV=3                                                            | sp P00558 PGK1_HUMAN (+1)    |
| 158 | Haptoglobin OS=Homo sapiens GN=HP PE=1 SV=1                                                                            | sp P00738 HPT_HUMAN (+1)     |

|     |                                                                                               |                              |
|-----|-----------------------------------------------------------------------------------------------|------------------------------|
| 159 | Isoform 2 of KN motif and ankyrin repeat domain-containing protein 2 OS=Homo sapiens GN=KANK2 | sp Q63ZY3-2 KANK2_HUMAN (+2) |
| 160 | EMILIN-1 OS=Homo sapiens GN=EMILIN1 PE=1 SV=2                                                 | sp Q9Y6C2 EMIL1_HUMAN        |
| 161 | Laminin subunit beta-2 OS=Homo sapiens GN=LAMB2 PE=1 SV=2                                     | sp P55268 LAMB2_HUMAN        |
| 162 | Isoform 3 of Unconventional myosin-Ic OS=Homo sapiens GN=MYO1C                                | sp O00159-3 MYO1C_HUMAN (+2) |
| 163 | 60 kDa heat shock protein, mitochondrial OS=Homo sapiens GN=HSPD1 PE=1 SV=2                   | sp P10809 CH60_HUMAN         |
| 164 | Isoform 2 of Glucose-6-phosphate isomerase OS=Homo sapiens GN=GPI                             | sp P06744-2 G6PI_HUMAN (+1)  |
| 165 | Isoform C1 of Heterogeneous nuclear ribonucleoproteins C1/C2 OS=Homo sapiens GN=HNRNPC        | sp P07910-2 HNRPC_HUMAN (+4) |
| 166 | Ras-related protein Rap-1A OS=Homo sapiens GN=RAP1A PE=1 SV=1                                 | sp P62834 RAP1A_HUMAN        |
| 167 | Serpin H1 OS=Homo sapiens GN=SERPINH1 PE=1 SV=2                                               | sp P50454 SERPH_HUMAN        |
| 168 | Polyubiquitin-B OS=Homo sapiens GN=UBB PE=1 SV=1                                              | sp P0CG47 UBB_HUMAN (+17)    |
| 169 | Isoform 2 of Protein disulfide-isomerase A6 OS=Homo sapiens GN=PDIA6                          | sp Q15084-2 PDIA6_HUMAN (+4) |
| 170 | Rho GTPase-activating protein 1 OS=Homo sapiens GN=ARHGAP1 PE=1 SV=1                          | sp Q07960 RHG01_HUMAN        |
| 171 | Stress-70 protein, mitochondrial OS=Homo sapiens GN=HSPA9 PE=1 SV=2                           | sp P38646 GRP75_HUMAN        |
| 172 | UTP--glucose-1-phosphate uridylyltransferase OS=Homo sapiens GN=UGP2 PE=1 SV=5                | sp Q16851 UGPA_HUMAN (+1)    |
| 173 | Tensin-1 OS=Homo sapiens GN=TNS1 PE=1 SV=2                                                    | sp Q9HBL0 TENS1_HUMAN (+2)   |
| 174 | Isoform 4 of Myosin-11 OS=Homo sapiens GN=MYH11                                               | sp P35749-4 MYH11_HUMAN      |
| 175 | Isoform 3 of Collagen alpha-1(XVIII) chain OS=Homo sapiens GN=COL18A1                         | sp P39060-2 CO1A1_HUMAN      |
| 176 | Importin subunit beta-1 OS=Homo sapiens GN=KPNB1 PE=1 SV=2                                    | sp Q14974 IMB1_HUMAN         |
| 177 | Integrin-linked protein kinase OS=Homo sapiens GN=ILK PE=1 SV=2                               | sp Q13418 ILK_HUMAN          |
| 178 | Calmodulin OS=Homo sapiens GN=CALM1 PE=1 SV=2                                                 | sp P62158 CALM_HUMAN (+3)    |
| 179 | BTB/POZ domain-containing protein KCTD12 OS=Homo sapiens GN=KCTD12 PE=1 SV=1                  | sp Q96CX2 KCD12_HUMAN        |
| 180 | Heterogeneous nuclear ribonucleoprotein D0 OS=Homo sapiens GN=HNRNPD PE=2 SV=1                | tr B4DTC3 B4DTC3_HUMAN       |
| 181 | Collagen alpha-2(IV) chain OS=Homo sapiens GN=COL4A2 PE=1 SV=4                                | sp P08572 CO4A2_HUMAN        |
| 182 | Collagen alpha-1(III) chain OS=Homo sapiens GN=COL3A1 PE=1 SV=4                               | sp P02461 CO3A1_HUMAN        |
| 183 | Polymerase I and transcript release factor OS=Homo sapiens GN=PTRF PE=1 SV=1                  | sp Q6NZI2 PTRF_HUMAN         |
| 184 | Eukaryotic initiation factor 4A-I OS=Homo sapiens GN=EIF4A1 PE=1 SV=1                         | sp P60842 IF4A1_HUMAN        |
| 185 | Isoform 3 of Drebrin OS=Homo sapiens GN=DBN1                                                  | sp Q16643-3 DREB_HUMAN (+1)  |
| 186 | Alanine--tRNA ligase, cytoplasmic OS=Homo sapiens GN=AARS PE=1 SV=2                           | sp P49588 SYAC_HUMAN         |
| 187 | Isoform 2 of Coronin-1C OS=Homo sapiens GN=CORO1C                                             | sp Q9ULV4-2 COR1C_HUMAN (+2) |
| 188 | Integrin alpha-1 OS=Homo sapiens GN=ITGA1 PE=1 SV=2                                           | sp P56199 ITA1_HUMAN         |
| 189 | Integrin alpha-5 OS=Homo sapiens GN=ITGA5 PE=1 SV=2                                           | sp P08648 ITA5_HUMAN         |
| 190 | Isoform 2 of Annexin A2 OS=Homo sapiens GN=ANXA2                                              | sp P07355-2 ANXA2_HUMAN (+1) |

|     |                                                                                          |                              |
|-----|------------------------------------------------------------------------------------------|------------------------------|
| 191 | Fibrillin-1 OS=Homo sapiens GN=FBN1 PE=1 SV=3                                            | sp P35555 FBN1_HUMAN         |
| 192 | Isoform 2 of Septin-7 OS=Homo sapiens GN=SEPT7                                           | sp Q16181-2 SEPT7_HUMAN (+4) |
| 193 | Non-POU domain-containing octamer-binding protein OS=Homo sapiens GN=NONO PE=1 SV=4      | sp Q15233 NONO_HUMAN         |
| 194 | Collagen alpha-2(V) chain OS=Homo sapiens GN=COL5A2 PE=1 SV=3                            | sp P05997 CO5A2_HUMAN        |
| 195 | High mobility group protein B1 OS=Homo sapiens GN=HMGB1 PE=1 SV=3                        | sp P09429 HMGB1_HUMAN (+2)   |
| 196 | Isoform 2 of Kinectin OS=Homo sapiens GN=KTN1                                            | sp Q86UP2-2 KTN1_HUMAN (+1)  |
| 197 | Alpha-1B-glycoprotein OS=Homo sapiens GN=A1BG PE=1 SV=4                                  | sp P04217 A1BG_HUMAN         |
| 198 | Isoform 2 of Nuclear mitotic apparatus protein 1 OS=Homo sapiens GN=NUMA1                | sp Q14980-2 NUMA1_HUMAN (+1) |
| 199 | Cytochrome c oxidase subunit 7A2, mitochondrial OS=Homo sapiens GN=COX7A2 PE=1 SV=1      | sp P14406 CX7A2_HUMAN (+1)   |
| 200 | Brain acid soluble protein 1 OS=Homo sapiens GN=BASP1 PE=1 SV=2                          | sp P80723 BASP1_HUMAN        |
| 201 | Dihydropyrimidinase-related protein 2 OS=Homo sapiens GN=DPYSL2 PE=1 SV=1                | sp Q16555 DPYL2_HUMAN        |
| 202 | Mimecan OS=Homo sapiens GN=OGN PE=1 SV=1                                                 | sp P20774 MIME_HUMAN         |
| 203 | Isoform 3 of Dynactin subunit 1 OS=Homo sapiens GN=DCTN1                                 | sp Q14203-3 DCTN1_HUMAN (+4) |
| 204 | Angiotensinogen OS=Homo sapiens GN=AGT PE=1 SV=1                                         | sp P01019 ANGT_HUMAN         |
| 205 | Chondroitin sulfate proteoglycan 4 OS=Homo sapiens GN=CSPG4 PE=1 SV=2                    | sp Q6UVK1 CSPG4_HUMAN        |
| 206 | Isochorismatase domain-containing protein 1 OS=Homo sapiens GN=ISOC1 PE=1 SV=3           | sp Q96CN7 ISOC1_HUMAN        |
| 207 | 14-3-3 protein epsilon OS=Homo sapiens GN=YWHAE PE=1 SV=1                                | sp P62258 1433E_HUMAN        |
| 208 | Caveolin-1 OS=Homo sapiens GN=CAV1 PE=1 SV=4                                             | sp Q03135 CAV1_HUMAN (+1)    |
| 209 | Lamin-B1 OS=Homo sapiens GN=LMNB1 PE=1 SV=2                                              | sp P20700 LMNB1_HUMAN        |
| 210 | Collagen alpha-1(XV) chain OS=Homo sapiens GN=COL15A1 PE=1 SV=2                          | sp P39059 COFA1_HUMAN        |
| 211 | Isoform 3 of L-lactate dehydrogenase A chain OS=Homo sapiens GN=LDHA                     | sp P00338-3 LDHA_HUMAN (+1)  |
| 212 | L-lactate dehydrogenase B chain OS=Homo sapiens GN=LDHB PE=1 SV=2                        | sp P07195 LDHB_HUMAN         |
| 213 | Isoform 2 of Hydroxyacyl-coenzyme A dehydrogenase, mitochondrial OS=Homo sapiens GN=HADH | sp Q16836-2 HCDH_HUMAN (+3)  |
| 214 | Coagulation factor XIII A chain OS=Homo sapiens GN=F13A1 PE=1 SV=4                       | sp P00488 F13A_HUMAN         |
| 215 | Isoform 3 of Dystrophin OS=Homo sapiens GN=DMD                                           | sp P11532-4 DMD_HUMAN (+2)   |
| 216 | Isoform Short of Ubiquitin carboxyl-terminal hydrolase 5 OS=Homo sapiens GN=USP5         | sp P45974-2 UBP5_HUMAN (+1)  |
| 217 | Heterogeneous nuclear ribonucleoprotein L OS=Homo sapiens GN=HNRNPL PE=1 SV=2            | sp P14866 HNRPL_HUMAN        |
| 218 | Fibulin-1 OS=Homo sapiens GN=FBLN1 PE=1 SV=4                                             | sp P23142 FBLN1_HUMAN        |
| 219 | Isoform 2 of Spliceosome RNA helicase DDX39B OS=Homo sapiens GN=DDX39B                   | sp Q13838-2 DX39B_HUMAN (+2) |
| 220 | Ig alpha-1 chain C region OS=Homo sapiens GN=IGHA1 PE=1 SV=2                             | sp P01876 IGHA1_HUMAN        |
| 221 | Isoform 2 of Septin-2 OS=Homo sapiens GN=SEPT2                                           | sp Q15019-2 SEPT2_HUMAN (+1) |
| 222 | Hypoxia up-regulated protein 1 OS=Homo sapiens GN=HYOU1 PE=1 SV=1                        | sp Q9Y4L1 HYOU1_HUMAN (+1)   |

|     |                                                                                                        |                              |
|-----|--------------------------------------------------------------------------------------------------------|------------------------------|
| 223 | Trifunctional enzyme subunit alpha, mitochondrial OS=Homo sapiens GN=HADHA PE=1 SV=2                   | sp P40939 ECHA_HUMAN         |
| 224 | Neutral alpha-glucosidase AB OS=Homo sapiens GN=GANAB PE=1 SV=3                                        | sp Q14697 GANAB_HUMAN (+1)   |
| 225 | Isoform 2 of Polypyrimidine tract-binding protein 1 OS=Homo sapiens GN=PTBP1                           | sp P26599-2 PTBP1_HUMAN (+2) |
| 226 | Isoform LMW of Kininogen-1 OS=Homo sapiens GN=KNG1                                                     | sp P01042-2 KNG1_HUMAN (+2)  |
| 227 | Protein-glutamine gamma-glutamyltransferase 2 OS=Homo sapiens GN=TGM2 PE=1 SV=2                        | sp P21980 TGM2_HUMAN (+1)    |
| 228 | Isoform 2 of Triosephosphate isomerase OS=Homo sapiens GN=TPI1                                         | sp P60174-1 TPIS_HUMAN (+1)  |
| 229 | DNA damage-binding protein 1 OS=Homo sapiens GN=DDB1 PE=1 SV=1                                         | sp Q16531 DDB1_HUMAN (+1)    |
| 230 | Protein disulfide-isomerase A4 OS=Homo sapiens GN=PDIA4 PE=1 SV=2                                      | sp P13667 PDIA4_HUMAN        |
| 231 | Pigment epithelium-derived factor OS=Homo sapiens GN=SERPINF1 PE=1 SV=4                                | sp P36955 PEDF_HUMAN         |
| 232 | 14-3-3 protein gamma OS=Homo sapiens GN=YWHAG PE=1 SV=2                                                | sp P61981 1433G_HUMAN        |
| 233 | Glutamate dehydrogenase 1, mitochondrial OS=Homo sapiens GN=GLUD1 PE=1 SV=2                            | sp P00367 DHE3_HUMAN         |
| 234 | Isoform 2 of Transforming growth factor beta-1-induced transcript 1 protein OS=Homo sapiens GN=TGFB111 | sp O43294-2 TGFI1_HUMAN (+1) |
| 235 | Tripartite motif-containing protein 47 OS=Homo sapiens GN=TRIM47 PE=1 SV=2                             | sp Q96LD4 TRI47_HUMAN        |
| 236 | Ig lambda-2 chain C regions OS=Homo sapiens GN=IGLC2 PE=1 SV=1                                         | sp POCG05 LAC2_HUMAN (+1)    |
| 237 | Isoform Short of Heterogeneous nuclear ribonucleoprotein U OS=Homo sapiens GN=HNRNPU                   | sp Q00839-2 HNRPU_HUMAN (+1) |
| 238 | Microtubule-associated protein 1B OS=Homo sapiens GN=MAP1B PE=1 SV=2                                   | sp P46821 MAP1B_HUMAN        |
| 239 | Isoform 3 of Laminin subunit alpha-3 OS=Homo sapiens GN=LAMA3                                          | sp Q16787-3 LAMA3_HUMAN (+1) |
| 240 | Aconitate hydratase, mitochondrial OS=Homo sapiens GN=ACO2 PE=1 SV=2                                   | sp Q99798 ACON_HUMAN (+1)    |
| 241 | 26S proteasome non-ATPase regulatory subunit 2 OS=Homo sapiens GN=PSMD2 PE=1 SV=3                      | sp Q13200 PSMD2_HUMAN (+1)   |
| 242 | Beta-2-glycoprotein 1 OS=Homo sapiens GN=APOH PE=1 SV=3                                                | sp P02749 APOH_HUMAN         |
| 243 | Fibulin-5 OS=Homo sapiens GN=FBLN5 PE=1 SV=1                                                           | sp Q9UBX5 FBLN5_HUMAN (+3)   |
| 244 | Isoform 3 of Importin-5 OS=Homo sapiens GN=IPO5                                                        | sp O00410-3 IPO5_HUMAN (+2)  |
| 245 | Actin-related protein 3 OS=Homo sapiens GN=ACTR3 PE=1 SV=3                                             | sp P61158 ARP3_HUMAN (+1)    |
| 246 | Isoform 1 of Ribosome-binding protein 1 OS=Homo sapiens GN=RRBP1                                       | sp Q9P2E9-2 RRBP1_HUMAN (+1) |
| 247 | Asporin OS=Homo sapiens GN=ASPN PE=1 SV=2                                                              | sp Q9BXN1 ASPN_HUMAN         |
| 248 | Peptidyl-prolyl cis-trans isomerase FKBP10 OS=Homo sapiens GN=FKBP10 PE=1 SV=1                         | sp Q96AY3 FKB10_HUMAN (+1)   |
| 249 | T-complex protein 1 subunit beta OS=Homo sapiens GN=CCT2 PE=1 SV=4                                     | sp P78371 TCPB_HUMAN         |
| 250 | Leucine--tRNA ligase, cytoplasmic OS=Homo sapiens GN=LARS PE=1 SV=2                                    | sp Q9P2J5 SYLC_HUMAN (+3)    |
| 251 | Glutathione S-transferase P OS=Homo sapiens GN=GSTP1 PE=1 SV=2                                         | sp P09211 GSTP1_HUMAN        |
| 252 | Transaldolase OS=Homo sapiens GN=TALDO1 PE=1 SV=2                                                      | sp P37837 TALDO_HUMAN        |
| 253 | Myosin regulatory light chain 12B OS=Homo sapiens GN=MYL12B PE=1 SV=2                                  | sp O14950 ML12B_HUMAN (+2)   |
| 254 | LIM and SH3 domain protein 1 OS=Homo sapiens GN=LASP1 PE=1 SV=2                                        | sp Q14847 LASP1_HUMAN        |



|     |                                                                                            |                              |
|-----|--------------------------------------------------------------------------------------------|------------------------------|
| 255 | Poly(rC)-binding protein 1 OS=Homo sapiens GN=PCBP1 PE=1 SV=2                              | sp Q15365 PCBP1_HUMAN        |
| 256 | Isoform 4 of CD109 antigen OS=Homo sapiens GN=CD109                                        | sp Q6YHK3-4 CD109_HUMAN (+1) |
| 257 | Isoform 2 of Tubulin alpha-1A chain OS=Homo sapiens GN=TUBA1A                              | sp Q71U36-2 TBA1A_HUMAN (+1) |
| 258 | Keratin, type I cytoskeletal 14 OS=Homo sapiens GN=KRT14 PE=1 SV=4                         | sp P02533 K1C14_HUMAN        |
| 259 | Isoform 2 of Heterogeneous nuclear ribonucleoprotein M OS=Homo sapiens GN=HNRNPM           | sp P52272-2 HNRPM_HUMAN (+1) |
| 260 | Isoform 2 of Eukaryotic translation initiation factor 3 subunit B OS=Homo sapiens GN=EIF3B | sp P55884-2 EIF3B_HUMAN (+1) |
| 261 | Isoform 2 of Calumenin OS=Homo sapiens GN=CALU                                             | sp O43852-2 CALU_HUMAN (+1)  |
| 262 | Complement factor B OS=Homo sapiens GN=CFB PE=1 SV=2                                       | sp P00751 CFAB_HUMAN (+1)    |
| 263 | Puromycin-sensitive aminopeptidase OS=Homo sapiens GN=NPEPPS PE=1 SV=2                     | sp P55786 PSA_HUMAN (+2)     |
| 264 | Isoform 2 of Collagen alpha-1(VII) chain OS=Homo sapiens GN=COL7A1                         | sp Q02388-2 CO7A1_HUMAN (+1) |
| 265 | Plastin-3 OS=Homo sapiens GN=PLS3 PE=1 SV=4                                                | sp P13797 PLST_HUMAN         |
| 266 | Amine oxidase [flavin-containing] B OS=Homo sapiens GN=MAOB PE=1 SV=3                      | sp P27338 AOFB_HUMAN (+1)    |
| 267 | Isoform A2 of Heterogeneous nuclear ribonucleoproteins A2/B1 OS=Homo sapiens GN=HNRNPA2B1  | sp P22626-2 ROA2_HUMAN (+1)  |
| 268 | Protein DJ-1 (Fragment) OS=Homo sapiens GN=PARK7 PE=2 SV=1                                 | tr K7EN27 K7EN27_HUMAN       |
| 269 | Alcohol dehydrogenase class-3 OS=Homo sapiens GN=ADH5 PE=1 SV=4                            | sp P11766 ADHX_HUMAN         |
| 270 | Isoform 3 of Nucleoside diphosphate kinase B OS=Homo sapiens GN=NME2                       | sp P22392-2 NDKB_HUMAN (+1)  |
| 271 | Prolyl endopeptidase OS=Homo sapiens GN=PREP PE=1 SV=2                                     | sp P48147 PPCE_HUMAN         |
| 272 | Ig gamma-2 chain C region OS=Homo sapiens GN=IGHG2 PE=1 SV=2                               | sp P01859 IGHG2_HUMAN        |
| 273 | 40S ribosomal protein SA OS=Homo sapiens GN=RPSA PE=1 SV=4                                 | sp P08865 RSSA_HUMAN (+1)    |
| 274 | Membrane primary amine oxidase OS=Homo sapiens GN=AOC3 PE=1 SV=3                           | sp Q16853 AOC3_HUMAN         |
| 275 | Apolipoprotein B-100 OS=Homo sapiens GN=APOB PE=1 SV=2                                     | sp P04114 APOB_HUMAN         |
| 276 | Isoform 2 of Septin-9 OS=Homo sapiens GN=SEPT9                                             | sp Q9UHD8-2 SEPT9_HUMAN (+4) |
| 277 | Peroxiredoxin-1 OS=Homo sapiens GN=PRDX1 PE=1 SV=1                                         | sp Q06830 PRDX1_HUMAN        |
| 278 | Cullin-associated NEDD8-dissociated protein 1 OS=Homo sapiens GN=CAND1 PE=1 SV=2           | sp Q86VP6 CAND1_HUMAN        |
| 279 | Isoform 2 of 26S proteasome non-ATPase regulatory subunit 1 OS=Homo sapiens GN=PSMD1       | sp Q99460-2 PSMD1_HUMAN (+1) |
| 280 | Elongation factor 1-gamma OS=Homo sapiens GN=EEF1G PE=2 SV=1                               | tr B4DTG2 B4DTG2_HUMAN (+1)  |
| 281 | Dystonin OS=Homo sapiens GN=DST PE=2 SV=2                                                  | tr E9PEB9 E9PEB9_HUMAN-R     |
| 282 | Hsp90 co-chaperone Cdc37 OS=Homo sapiens GN=CDC37 PE=1 SV=1                                | sp Q16543 CDC37_HUMAN        |
| 283 | Isoform 2B of Cytoplasmic dynein 1 intermediate chain 2 OS=Homo sapiens GN=DYNC12          | sp Q13409-2 DC12_HUMAN (+6)  |
| 284 | Inter-alpha-trypsin inhibitor heavy chain H1 OS=Homo sapiens GN=ITIH1 PE=1 SV=3            | sp P19827 ITIH1_HUMAN (+1)   |
| 285 | Synaptic vesicle membrane protein VAT-1 homolog OS=Homo sapiens GN=VAT1 PE=1 SV=2          | sp Q99536 VAT1_HUMAN         |
| 286 | von Willebrand factor OS=Homo sapiens GN=VWF PE=1 SV=4                                     | sp P04275 VWF_HUMAN          |

|     |                                                                                             |                              |
|-----|---------------------------------------------------------------------------------------------|------------------------------|
| 287 | AP-2 complex subunit beta OS=Homo sapiens GN=AP2B1 PE=2 SV=1                                | tr K7EJT8 K7EJT8_HUMAN       |
| 288 | U5 small nuclear ribonucleoprotein 200 kDa helicase OS=Homo sapiens GN=SNRNP200 PE=1 SV=2   | sp O75643 U520_HUMAN         |
| 289 | Glycogen phosphorylase, brain form OS=Homo sapiens GN=PYGB PE=1 SV=5                        | sp P11216 PYGB_HUMAN         |
| 290 | Fascin OS=Homo sapiens GN=FSCN1 PE=1 SV=3                                                   | sp Q16658 FSCN1_HUMAN (+1)   |
| 291 | Isoform 2 of F-actin-capping protein subunit beta OS=Homo sapiens GN=CAPZB                  | sp P47756-2 CAPZB_HUMAN (+2) |
| 292 | Splicing factor 3B subunit 3 OS=Homo sapiens GN=SF3B3 PE=1 SV=4                             | sp Q15393 SF3B3_HUMAN        |
| 293 | Eukaryotic initiation factor 4A-III OS=Homo sapiens GN=EIF4A3 PE=1 SV=4                     | sp P38919 IF4A3_HUMAN        |
| 294 | Isoform 2 of Alpha-aminoacidic semialdehyde dehydrogenase OS=Homo sapiens GN=ALDH7A1        | sp P49419-2 AL7A1_HUMAN      |
| 295 | Hemoglobin subunit beta OS=Homo sapiens GN=HBB PE=1 SV=2                                    | sp P68871 HBB_HUMAN          |
| 296 | Isoform 2 of 116 kDa U5 small nuclear ribonucleoprotein component OS=Homo sapiens GN=EFTUD2 | sp Q15029-2 U5S1_HUMAN       |
| 297 | Isoform 2 of Programmed cell death 6-interacting protein OS=Homo sapiens GN=PDCD6IP         | sp Q8WUM4-2 PDC6I_HUMAN (+1) |
| 298 | Ras suppressor protein 1 OS=Homo sapiens GN=RSU1 PE=1 SV=3                                  | sp Q15404 RSU1_HUMAN         |
| 299 | 14-3-3 protein theta OS=Homo sapiens GN=YWHAQ PE=1 SV=1                                     | sp P27348 1433T_HUMAN        |
| 300 | Isoform 1 of Core histone macro-H2A.1 OS=Homo sapiens GN=H2AFY                              | sp O75367-2 H2AY_HUMAN       |
| 301 | Parathyrosin OS=Homo sapiens GN=PTMS PE=1 SV=2                                              | sp P20962 PTMS_HUMAN         |
| 302 | Peptidyl-prolyl cis-trans isomerase B OS=Homo sapiens GN=PPIB PE=1 SV=2                     | sp P23284 PPIB_HUMAN         |
| 303 | Heat shock 70 kDa protein 4 OS=Homo sapiens GN=HSPA4 PE=1 SV=4                              | sp P34932 HSP74_HUMAN        |
| 304 | Splicing factor, proline- and glutamine-rich OS=Homo sapiens GN=SFPQ PE=1 SV=2              | sp P23246 SFPQ_HUMAN         |
| 305 | Dihydropyrimidinase-related protein 1 OS=Homo sapiens GN=CRMP1 PE=1 SV=1                    | sp Q14194 DPYL1_HUMAN        |
| 306 | Fibromodulin OS=Homo sapiens GN=FMOD PE=1 SV=2                                              | sp Q06828 FMOD_HUMAN         |
| 307 | Coatmer subunit gamma-1 OS=Homo sapiens GN=COPG1 PE=1 SV=1                                  | sp Q9Y678 COPG1_HUMAN        |
| 308 | Isoform 3 of Protein flightless-1 homolog OS=Homo sapiens GN=FLII                           | sp Q13045-3 FLII_HUMAN (+2)  |
| 309 | Isoform 2 of 2-oxoglutarate dehydrogenase, mitochondrial OS=Homo sapiens GN=OGDH            | sp Q02218-2 ODO1_HUMAN (+4)  |
| 310 | Isoform 2 of Ig mu chain C region OS=Homo sapiens GN=IGHM                                   | sp P01871-2 IGHM_HUMAN (+1)  |
| 311 | Tropomodulin-1 OS=Homo sapiens GN=TMOD1 PE=1 SV=1                                           | sp P28289 TMOD1_HUMAN        |
| 312 | Phosphoglucomutase-2 OS=Homo sapiens GN=PGM2 PE=1 SV=4                                      | sp Q96G03 PGM2_HUMAN         |
| 313 | Supervillin OS=Homo sapiens GN=SVIL PE=1 SV=2                                               | sp O95425 SVIL_HUMAN (+1)    |
| 314 | Vacuolar protein sorting-associated protein 35 OS=Homo sapiens GN=VPS35 PE=1 SV=2           | sp Q96QK1 VPS35_HUMAN        |
| 315 | 6-phosphofructokinase, liver type OS=Homo sapiens GN=PFKL PE=1 SV=6                         | sp P17858 K6PL_HUMAN         |
| 316 | Cytoplasmic aconitate hydratase OS=Homo sapiens GN=ACO1 PE=1 SV=3                           | sp P21399 ACOC_HUMAN (+1)    |
| 317 | Cell surface glycoprotein MUC18 OS=Homo sapiens GN=MCAM PE=1 SV=2                           | sp P43121 MUC18_HUMAN        |

|     |                                                                                                            |                               |
|-----|------------------------------------------------------------------------------------------------------------|-------------------------------|
| 318 | Complement component C9 OS=Homo sapiens GN=C9 PE=1 SV=2                                                    | sp P02748 CO9_HUMAN           |
| 319 | DNA-(apurinic or apyrimidinic site) lyase OS=Homo sapiens GN=APEX1 PE=1 SV=2                               | sp P27695 APEX1_HUMAN         |
| 320 | Malate dehydrogenase, mitochondrial OS=Homo sapiens GN=MDH2 PE=1 SV=3                                      | sp P40926 MDHM_HUMAN          |
| 321 | 60S acidic ribosomal protein P0 OS=Homo sapiens GN=RPLP0 PE=1 SV=1                                         | sp P05388 RLA0_HUMAN          |
| 322 | Hexokinase-1 OS=Homo sapiens GN=HK1 PE=2 SV=1                                                              | tr E7ENR4 E7ENR4_HUMAN (+4)   |
| 323 | Fatty acid-binding protein, heart OS=Homo sapiens GN=FABP3 PE=1 SV=4                                       | sp P05413 FABPH_HUMAN (+1)    |
| 324 | Structural maintenance of chromosomes protein 3 OS=Homo sapiens GN=SMC3 PE=1 SV=2                          | sp Q9UQE7 SMC3_HUMAN          |
| 325 | F-actin-capping protein subunit alpha-1 OS=Homo sapiens GN=CAPZA1 PE=1 SV=3                                | sp P52907 CAZA1_HUMAN         |
| 326 | 3-mercaptopyruvate sulfurtransferase OS=Homo sapiens GN=MPST PE=1 SV=3                                     | sp P25325 THTM_HUMAN (+1)     |
| 327 | SH3 domain-binding glutamic acid-rich-like protein OS=Homo sapiens GN=SH3BGL PE=1 SV=1                     | sp O75368 SH3L1_HUMAN         |
| 328 | Dolichyl-diphosphooligosaccharide--protein glycosyltransferase subunit 2 OS=Homo sapiens GN=RPN2 PE=1 SV=3 | sp P04844 RPN2_HUMAN          |
| 329 | Peptidyl-prolyl cis-trans isomerase FKBP5 OS=Homo sapiens GN=FKBP5 PE=1 SV=2                               | sp Q13451 FKBP5_HUMAN         |
| 330 | RuvB-like 2 OS=Homo sapiens GN=RUVBL2 PE=1 SV=3                                                            | sp Q9Y230 RUVB2_HUMAN (+1)    |
| 331 | Isoform 2 of Inter-alpha-trypsin inhibitor heavy chain H4 OS=Homo sapiens GN=ITIH4                         | sp Q14624-2 ITIH4_HUMAN       |
| 332 | Isoform 2 of Fibrinogen alpha chain OS=Homo sapiens GN=FGA                                                 | sp P02671-2 FIBA_HUMAN (+1)   |
| 333 | Eosinophil peroxidase OS=Homo sapiens GN=EPX PE=1 SV=2                                                     | sp P11678 PERE_HUMAN          |
| 334 | Hsc70-interacting protein OS=Homo sapiens GN=ST13 PE=1 SV=2                                                | sp P50502 F10A1_HUMAN (+1)    |
| 335 | Isoform 3 of Heterogeneous nuclear ribonucleoprotein Q OS=Homo sapiens GN=SYNCRIP                          | sp O60506-3 HNRPQ_HUMAN (+1)  |
| 336 | Complement C5 OS=Homo sapiens GN=C5 PE=1 SV=4                                                              | sp P01031 CO5_HUMAN           |
| 337 | Isoform 2 of Annexin A7 OS=Homo sapiens GN=ANXA7                                                           | sp P20073-2 ANXA7_HUMAN (+2)  |
| 338 | Annexin A11 OS=Homo sapiens GN=ANXA11 PE=1 SV=1                                                            | sp P50995 ANX11_HUMAN (+1)    |
| 339 | Pre-mRNA-processing-splicing factor 8 OS=Homo sapiens GN=PRPF8 PE=1 SV=2                                   | sp Q6P2Q9 PRP8_HUMAN          |
| 340 | Isoform 2 of Filamin A-interacting protein 1-like OS=Homo sapiens GN=FILIP1L                               | sp Q4L180-2 FIL1L_HUMAN (+4)  |
| 341 | Isoform 2 of Elongation factor 1-delta OS=Homo sapiens GN=EEF1D                                            | sp P29692-2 EF1D_HUMAN (+4)   |
| 342 | Isocitrate dehydrogenase [NADP], mitochondrial OS=Homo sapiens GN=IDH2 PE=1 SV=2                           | sp P48735 IDHP_HUMAN (+1)     |
| 343 | Isoform 2 of Ryanodine receptor 2 OS=Homo sapiens GN=RYR2                                                  | sp Q92736-2 RYR2_HUMAN-R (+3) |
| 344 | Alpha-1-acid glycoprotein 1 OS=Homo sapiens GN=ORM1 PE=1 SV=1                                              | sp P02763 A1AG1_HUMAN         |
| 345 | Rab GDP dissociation inhibitor alpha OS=Homo sapiens GN=GDI1 PE=1 SV=2                                     | sp P31150 GDIA_HUMAN          |
| 346 | Tyrosine--tRNA ligase, cytoplasmic OS=Homo sapiens GN=YARS PE=1 SV=4                                       | sp P54577 SYYC_HUMAN          |
| 347 | Isoform 3 of T-complex protein 1 subunit eta OS=Homo sapiens GN=CCT7                                       | sp Q99832-3 TCPH_HUMAN (+1)   |
| 348 | Isoform 2 of Vigilin OS=Homo sapiens GN=HDLBP                                                              | sp Q00341-2 VIGLN_HUMAN (+1)  |
| 349 | RuvB-like 1 OS=Homo sapiens GN=RUVBL1 PE=1 SV=1                                                            | sp Q9Y265 RUVB1_HUMAN         |

|     |                                                                                                                                                    |                              |
|-----|----------------------------------------------------------------------------------------------------------------------------------------------------|------------------------------|
| 350 | Isoform 2 of LIM and senescent cell antigen-like-containing domain protein 1 OS=Homo sapiens GN=LIMS1                                              | sp P48059-2 LIMS1_HUMAN (+4) |
| 351 | Isoform 2 of Bifunctional purine biosynthesis protein PURH OS=Homo sapiens GN=ATIC                                                                 | sp P31939-2 PUR9_HUMAN (+2)  |
| 352 | Histone H3.2 OS=Homo sapiens GN=HIST2H3A PE=1 SV=3                                                                                                 | sp Q71DI3 H32_HUMAN          |
| 353 | Fibrinogen beta chain OS=Homo sapiens GN=FGB PE=1 SV=2                                                                                             | sp P02675 FIBB_HUMAN         |
| 354 | Isoform Monomeric of Arginine--tRNA ligase, cytoplasmic OS=Homo sapiens GN=RARS                                                                    | sp P54136-2 SYRC_HUMAN (+1)  |
| 355 | Isocitrate dehydrogenase [NADP] cytoplasmic OS=Homo sapiens GN=IDH1 PE=1 SV=2                                                                      | sp O75874 IDHC_HUMAN         |
| 356 | Catalase OS=Homo sapiens GN=CAT PE=1 SV=3                                                                                                          | sp P04040 CATA_HUMAN         |
| 357 | Isoform 2 of Neural cell adhesion molecule 1 OS=Homo sapiens GN=NCAM1                                                                              | sp P13591-1 NCAM1_HUMAN (+2) |
| 358 | Isoform 2 of Dynactin subunit 2 OS=Homo sapiens GN=DCTN2                                                                                           | sp Q13561-2 DCTN2_HUMAN (+5) |
| 359 | Isoform 2 of Probable ATP-dependent RNA helicase DDX17 OS=Homo sapiens GN=DDX17                                                                    | sp Q92841-1 DDX17_HUMAN (+5) |
| 360 | Cofilin-2 OS=Homo sapiens GN=CFL2 PE=1 SV=1                                                                                                        | sp Q9Y281 COF2_HUMAN         |
| 361 | Isoform 2 of Glucosidase 2 subunit beta OS=Homo sapiens GN=PRKCSH                                                                                  | sp P14314-2 GLU2B_HUMAN (+2) |
| 362 | Asparagine--tRNA ligase, cytoplasmic OS=Homo sapiens GN=NARS PE=1 SV=1                                                                             | sp O43776 SYNC_HUMAN         |
| 363 | Isoform 2 of Eukaryotic translation initiation factor 5A-1 OS=Homo sapiens GN=EIF5A                                                                | sp P63241-2 IF5A1_HUMAN (+3) |
| 364 | Isoform Short of 14-3-3 protein beta/alpha OS=Homo sapiens GN=YWHAB                                                                                | sp P31946-2 1433B_HUMAN (+1) |
| 365 | Phosphoglucomutase-1 OS=Homo sapiens GN=PGM1 PE=1 SV=3                                                                                             | sp P36871 PGM1_HUMAN         |
| 366 | Isoform 2 of Tryptophan--tRNA ligase, cytoplasmic OS=Homo sapiens GN=WARS                                                                          | sp P23381-2 SYWC_HUMAN (+1)  |
| 367 | Isoform 2 of 5'-nucleotidase OS=Homo sapiens GN=NT5E                                                                                               | sp P21589-2 5NTD_HUMAN (+1)  |
| 368 | Protein AMBP OS=Homo sapiens GN=AMBP PE=1 SV=1                                                                                                     | sp P02760 AMBP_HUMAN (+1)    |
| 369 | Zyxin OS=Homo sapiens GN=ZYX PE=1 SV=1                                                                                                             | sp Q15942 ZYX_HUMAN          |
| 370 | Aldehyde dehydrogenase, mitochondrial OS=Homo sapiens GN=ALDH2 PE=1 SV=2                                                                           | sp P05091 ALDH2_HUMAN        |
| 371 | Isoform 2 of ATP-citrate synthase OS=Homo sapiens GN=ACLY                                                                                          | sp P53396-2 ACLY_HUMAN (+1)  |
| 372 | Heterogeneous nuclear ribonucleoprotein H OS=Homo sapiens GN=HNRNPH1 PE=1 SV=4                                                                     | sp P31943 HNRH1_HUMAN (+2)   |
| 373 | Isoform 2 of Coatomer subunit alpha OS=Homo sapiens GN=COPA                                                                                        | sp P53621-2 COPA_HUMAN (+1)  |
| 374 | 26S protease regulatory subunit 7 OS=Homo sapiens GN=PSMC2 PE=1 SV=3                                                                               | sp P35998 PRS7_HUMAN         |
| 375 | Actin-related protein 2/3 complex subunit 2 OS=Homo sapiens GN=ARPC2 PE=1 SV=1                                                                     | sp O15144 ARPC2_HUMAN        |
| 376 | Calpain-2 catalytic subunit OS=Homo sapiens GN=CAPN2 PE=1 SV=6                                                                                     | sp P17655 CAN2_HUMAN         |
| 377 | Poly [ADP-ribose] polymerase 1 OS=Homo sapiens GN=PARP1 PE=1 SV=4                                                                                  | sp P09874 PARP1_HUMAN        |
| 378 | Inter-alpha-trypsin inhibitor heavy chain H2 OS=Homo sapiens GN=ITI2 PE=1 SV=2                                                                     | sp P19823 ITI2_HUMAN (+1)    |
| 379 | Lupus La protein OS=Homo sapiens GN=SSB PE=1 SV=2                                                                                                  | sp P05455 LA_HUMAN           |
| 380 | Dihydrolipoyllysine-residue succinyltransferase component of 2-oxoglutarate dehydrogenase complex, mitochondrial OS=Homo sapiens GN=DLST PE=1 SV=4 | sp P36957 ODO2_HUMAN         |

|     |                                                                                                    |                              |
|-----|----------------------------------------------------------------------------------------------------|------------------------------|
| 381 | Collagen alpha-1(V) chain OS=Homo sapiens GN=COL5A1 PE=1 SV=3                                      | sp P20908 CO5A1_HUMAN        |
| 382 | Plasma protease C1 inhibitor OS=Homo sapiens GN=SERPING1 PE=1 SV=2                                 | sp P05155 IC1_HUMAN (+2)     |
| 383 | Protein kinase C delta-binding protein OS=Homo sapiens GN=PRKCDBP PE=1 SV=3                        | sp Q969G5 PRDBP_HUMAN        |
| 384 | Isoform Cytoplasmic of Fumarate hydratase, mitochondrial OS=Homo sapiens GN=FH                     | sp P07954-2 FUMH_HUMAN (+1)  |
| 385 | Isoform 2 of Nidogen-2 OS=Homo sapiens GN=NID2                                                     | sp Q14112-2 NID2_HUMAN (+1)  |
| 386 | Actin-related protein 2 OS=Homo sapiens GN=ACTR2 PE=1 SV=1                                         | sp P61160 ARP2_HUMAN         |
| 387 | F-actin-capping protein subunit alpha-2 OS=Homo sapiens GN=CAPZA2 PE=1 SV=3                        | sp P47755 CAZA2_HUMAN        |
| 388 | Calpain-1 catalytic subunit OS=Homo sapiens GN=CAPN1 PE=1 SV=1                                     | sp P07384 CAN1_HUMAN         |
| 389 | Isoform 2 of Interleukin enhancer-binding factor 3 OS=Homo sapiens GN=ILF3                         | sp Q12906-2 ILF3_HUMAN (+6)  |
| 390 | 3-hydroxyacyl-CoA dehydrogenase type-2 OS=Homo sapiens GN=HSD17B10 PE=1 SV=3                       | sp Q99714 HCD2_HUMAN         |
| 391 | N(G),N(G)-dimethylarginine dimethylaminohydrolase 2 OS=Homo sapiens GN=DDAH2 PE=1 SV=1             | sp O95865 DDAH2_HUMAN        |
| 392 | KDEL motif-containing protein 2 OS=Homo sapiens GN=KDEL2 PE=1 SV=2                                 | sp Q7Z4H8 KDEL2_HUMAN        |
| 393 | Peptidyl-prolyl cis-trans isomerase A OS=Homo sapiens GN=PPIA PE=1 SV=2                            | sp P62937 PPIA_HUMAN         |
| 394 | Guanine nucleotide-binding protein G(I)/G(S)/G(T) subunit beta-1 OS=Homo sapiens GN=GNB1 PE=1 SV=3 | sp P62873 GBB1_HUMAN (+2)    |
| 395 | Chloride intracellular channel protein 4 OS=Homo sapiens GN=CLIC4 PE=1 SV=4                        | sp Q9Y696 CLIC4_HUMAN        |
| 396 | Prostacyclin synthase OS=Homo sapiens GN=PTGIS PE=1 SV=1                                           | sp Q16647 PTGIS_HUMAN        |
| 397 | Plasminogen OS=Homo sapiens GN=PLG PE=1 SV=2                                                       | sp P00747 PLMN_HUMAN         |
| 398 | ATP-dependent RNA helicase DDX1 OS=Homo sapiens GN=DDX1 PE=1 SV=2                                  | sp Q92499 DDX1_HUMAN         |
| 399 | Phosphoglycerate mutase 1 OS=Homo sapiens GN=PGAM1 PE=1 SV=2                                       | sp P18669 PGAM1_HUMAN        |
| 400 | Isoform Long of Proteasome subunit alpha type-1 OS=Homo sapiens GN=PSMA1                           | sp P25786-2 PSA1_HUMAN (+1)  |
| 401 | Interleukin enhancer-binding factor 2 OS=Homo sapiens GN=ILF2 PE=1 SV=2                            | sp Q12905 ILF2_HUMAN         |
| 402 | Alcohol dehydrogenase [NADP(+)] OS=Homo sapiens GN=AKR1A1 PE=1 SV=3                                | sp P14550 AK1A1_HUMAN        |
| 403 | Stathmin OS=Homo sapiens GN=STMN1 PE=1 SV=3                                                        | sp P16949 STMN1_HUMAN        |
| 404 | Chloride intracellular channel protein 1 OS=Homo sapiens GN=CLIC1 PE=1 SV=4                        | sp O00299 CLIC1_HUMAN        |
| 405 | Isoform B of Ras-related C3 botulinum toxin substrate 1 OS=Homo sapiens GN=RAC1                    | sp P63000-2 RAC1_HUMAN (+1)  |
| 406 | Gamma-enolase OS=Homo sapiens GN=ENO2 PE=1 SV=3                                                    | sp P09104 ENOG_HUMAN (+1)    |
| 407 | Valine--tRNA ligase OS=Homo sapiens GN=VARS PE=1 SV=4                                              | sp P26640 SYVC_HUMAN         |
| 408 | Isoform 2 of Olfactomedin-like protein 3 OS=Homo sapiens GN=OLFML3                                 | sp Q9NRN5-2 OLFL3_HUMAN (+1) |
| 409 | D-3-phosphoglycerate dehydrogenase OS=Homo sapiens GN=PHGDH PE=1 SV=4                              | sp O43175 SERA_HUMAN (+1)    |
| 410 | Cleavage and polyadenylation-specificity factor subunit 6 OS=Homo sapiens GN=CPSF6 PE=2 SV=1       | tr F8WJN3 F8WJN3_HUMAN       |
| 411 | ADP/ATP translocase 3 OS=Homo sapiens GN=SLC25A6 PE=1 SV=4                                         | sp P12236 ADT3_HUMAN         |

|     |                                                                                                       |                              |
|-----|-------------------------------------------------------------------------------------------------------|------------------------------|
| 412 | Isoform SM-B of Small nuclear ribonucleoprotein-associated proteins B and B' OS=Homo sapiens GN=SNRPB | sp P14678-2 RSMB_HUMAN (+2)  |
| 413 | Isoform 2 of Sulfhydryl oxidase 1 OS=Homo sapiens GN=QSOX1                                            | sp O00391-2 QSOX1_HUMAN (+1) |
| 414 | Isoform C of AP-1 complex subunit beta-1 OS=Homo sapiens GN=AP1B1                                     | sp Q10567-3 AP1B1_HUMAN (+4) |
| 415 | Isoform 2 of Clusterin OS=Homo sapiens GN=CLU                                                         | sp P10909-2 CLUS_HUMAN (+3)  |
| 416 | Transgelin-2 OS=Homo sapiens GN=TAGLN2 PE=1 SV=3                                                      | sp P37802 TAGL2_HUMAN        |
| 417 | Isoform 2 of Histone H1.0 OS=Homo sapiens GN=H1F0                                                     | sp P07305-2 H10_HUMAN (+1)   |
| 418 | PDZ and LIM domain protein 5 OS=Homo sapiens GN=PDLIM5 PE=1 SV=5                                      | sp Q96HC4 PDLI5_HUMAN        |
| 419 | Isoform 2 of AP-2 complex subunit alpha-2 OS=Homo sapiens GN=AP2A2                                    | sp O94973-2 AP2A2_HUMAN (+1) |
| 420 | Importin-7 OS=Homo sapiens GN=IPO7 PE=1 SV=1                                                          | sp O95373 IPO7_HUMAN         |
| 421 | Vitronectin OS=Homo sapiens GN=VTN PE=1 SV=1                                                          | sp P04004 VTNC_HUMAN         |
| 422 | Dynein heavy chain 2, axonemal OS=Homo sapiens GN=DNAH2 PE=2 SV=3                                     | sp Q9P225 DYH2_HUMAN (+1)    |
| 423 | 6-phosphofructokinase type C OS=Homo sapiens GN=PFKP PE=1 SV=2                                        | sp Q01813 K6PP_HUMAN         |
| 424 | Fatty acid synthase OS=Homo sapiens GN=FASN PE=1 SV=3                                                 | sp P49327 FAS_HUMAN          |
| 425 | Protein phosphatase 1 regulatory subunit 7 (Fragment) OS=Homo sapiens GN=PPP1R7 PE=2 SV=1             | tr C9J177 C9J177_HUMAN       |
| 426 | Isoform 2 of Protein SET OS=Homo sapiens GN=SET                                                       | sp Q01105-2 SET_HUMAN        |
| 427 | T-complex protein 1 subunit theta OS=Homo sapiens GN=CCT8 PE=1 SV=4                                   | sp P50990 TCPQ_HUMAN (+2)    |
| 428 | Plexin domain-containing protein 2 OS=Homo sapiens GN=PLXDC2 PE=1 SV=1                                | sp Q6UX71 PXDC2_HUMAN        |
| 429 | Isoform 3 of Selenium-binding protein 1 OS=Homo sapiens GN=SELENBP1                                   | sp Q13228-3 SBP1_HUMAN (+2)  |
| 430 | Protein transport protein Sec23A OS=Homo sapiens GN=SEC23A PE=1 SV=2                                  | sp Q15436 SC23A_HUMAN (+3)   |
| 431 | Isoform 2 of Collagen alpha-6(VI) chain OS=Homo sapiens GN=COL6A6                                     | sp A6NMZ7-2 CO6A6_HUMAN (+2) |
| 432 | Glutathione S-transferase Mu 3 OS=Homo sapiens GN=GSTM3 PE=1 SV=3                                     | sp P21266 GSTM3_HUMAN        |
| 433 | Serpin B6 OS=Homo sapiens GN=SERPINB6 PE=1 SV=3                                                       | sp P35237 SPB6_HUMAN         |
| 434 | Isoform 8 of Tropomyosin alpha-1 chain OS=Homo sapiens GN=TPM1                                        | sp P09493-8 TPM1_HUMAN       |
| 435 | Quinone oxidoreductase OS=Homo sapiens GN=CRYZ PE=1 SV=1                                              | sp Q08257 QOR_HUMAN          |
| 436 | Isoform 2 of 26S proteasome non-ATPase regulatory subunit 5 OS=Homo sapiens GN=PSMD5                  | sp Q16401-2 PSMD5_HUMAN (+1) |
| 437 | Isoform 2 of Cytosol aminopeptidase OS=Homo sapiens GN=LAP3                                           | sp P28838-2 AMPL_HUMAN (+1)  |
| 438 | Proteasome subunit alpha type-6 OS=Homo sapiens GN=PSMA6 PE=1 SV=1                                    | sp P60900 PSA6_HUMAN (+2)    |
| 439 | 60S ribosomal protein L6 OS=Homo sapiens GN=RPL6 PE=1 SV=3                                            | sp Q02878 RL6_HUMAN          |
| 440 | Alpha-1-acid glycoprotein 2 OS=Homo sapiens GN=ORM2 PE=1 SV=2                                         | sp P19652 A1AG2_HUMAN        |
| 441 | Apolipoprotein A-II OS=Homo sapiens GN=APOA2 PE=1 SV=1                                                | sp P02652 APOA2_HUMAN        |
| 442 | Cathepsin D OS=Homo sapiens GN=CTSD PE=1 SV=1                                                         | sp P07339 CATD_HUMAN         |
| 443 | Isoform 4 of Leukotriene A-4 hydrolase OS=Homo sapiens GN=LTA4H                                       | sp P09960-4 LKHA4_HUMAN (+1) |

|     |                                                                                                              |                              |
|-----|--------------------------------------------------------------------------------------------------------------|------------------------------|
| 444 | Citrate synthase, mitochondrial OS=Homo sapiens GN=CS PE=1 SV=2                                              | sp O75390 CISY_HUMAN (+1)    |
| 445 | Aspartate--tRNA ligase, cytoplasmic OS=Homo sapiens GN=DARS PE=1 SV=2                                        | sp P14868 SYDC_HUMAN         |
| 446 | Isoform 2 of T-complex protein 1 subunit delta OS=Homo sapiens GN=CCT4                                       | sp P50991-2 TCPD_HUMAN (+1)  |
| 447 | Protein argonaute-1 OS=Homo sapiens GN=AGO1 PE=1 SV=3                                                        | sp Q9UL18 AGO1_HUMAN (+1)    |
| 448 | UDP-glucose 6-dehydrogenase OS=Homo sapiens GN=UGDH PE=1 SV=1                                                | sp O60701 UGDH_HUMAN (+1)    |
| 449 | Isoform 1 of Ubiquitin-conjugating enzyme E2 variant 1 OS=Homo sapiens GN=UBE2V1                             | sp Q13404-1 UB2V1_HUMAN (+4) |
| 450 | Isoleucine--tRNA ligase, cytoplasmic OS=Homo sapiens GN=IARS PE=1 SV=2                                       | sp P41252 SYIC_HUMAN (+1)    |
| 451 | 40S ribosomal protein S21 OS=Homo sapiens GN=RPS21 PE=1 SV=1                                                 | sp P63220 RS21_HUMAN (+1)    |
| 452 | Exportin-1 OS=Homo sapiens GN=XPO1 PE=1 SV=1                                                                 | sp O14980 XPO1_HUMAN         |
| 453 | Isoform 4 of Leucine-rich repeat flightless-interacting protein 1 OS=Homo sapiens GN=LRRFIP1                 | sp Q32MZ4-4 LRRF1_HUMAN (+1) |
| 454 | Isoform 2 of ATP-dependent RNA helicase DDX3X OS=Homo sapiens GN=DDX3X                                       | sp O00571-2 DDX3X_HUMAN (+1) |
| 455 | Heat shock 70 kDa protein 6 OS=Homo sapiens GN=HSPA6 PE=1 SV=2                                               | sp P17066 HSP76_HUMAN        |
| 456 | Isoform 2 of Prohibitin-2 OS=Homo sapiens GN=PHB2                                                            | sp Q99623-2 PHB2_HUMAN (+4)  |
| 457 | Isoform 3 of Obg-like ATPase 1 OS=Homo sapiens GN=OLA1                                                       | sp Q9NTK5-3 OLA1_HUMAN (+3)  |
| 458 | Isoform 2 of Inactive tyrosine-protein kinase 7 OS=Homo sapiens GN=PTK7                                      | sp Q13308-2 PTK7_HUMAN (+4)  |
| 459 | Bifunctional glutamate/proline--tRNA ligase OS=Homo sapiens GN=EPRS PE=1 SV=5                                | sp P07814 SYEP_HUMAN         |
| 460 | Soluble scavenger receptor cysteine-rich domain-containing protein SSC5D OS=Homo sapiens GN=SSC5D PE=2 SV=3  | sp A1L4H1 SRCRL_HUMAN        |
| 461 | Protein farnesyltransferase/geranylgeranyltransferase type-1 subunit alpha OS=Homo sapiens GN=FNTA PE=1 SV=1 | sp P49354 FNTA_HUMAN         |
| 462 | Isoform Alpha-6X2A of Integrin alpha-6 OS=Homo sapiens GN=ITGA6                                              | sp P23229-4 ITA6_HUMAN (+7)  |
| 463 | Isoform 2 of Protein phosphatase 1 regulatory subunit 12A OS=Homo sapiens GN=PPP1R12A                        | sp O14974-2 MYPT1_HUMAN (+5) |
| 464 | 26S proteasome non-ATPase regulatory subunit 3 OS=Homo sapiens GN=PSMD3 PE=1 SV=2                            | sp O43242 PSMD3_HUMAN        |
| 465 | Coiled-coil domain-containing protein 6 OS=Homo sapiens GN=CCDC6 PE=1 SV=2                                   | sp Q16204 CCDC6_HUMAN        |
| 466 | Aldehyde dehydrogenase X, mitochondrial OS=Homo sapiens GN=ALDH1B1 PE=1 SV=3                                 | sp P30837 AL1B1_HUMAN        |
| 467 | Isoform 3 of Nucleophosmin OS=Homo sapiens GN=NPM1                                                           | sp P06748-3 NPM_HUMAN (+1)   |
| 468 | Kinesin-1 heavy chain OS=Homo sapiens GN=KIF5B PE=1 SV=1                                                     | sp P33176 KINH_HUMAN         |
| 469 | Thioredoxin-dependent peroxide reductase, mitochondrial OS=Homo sapiens GN=PRDX3 PE=1 SV=3                   | sp P30048 PRDX3_HUMAN (+1)   |
| 470 | Alpha-2-HS-glycoprotein OS=Homo sapiens GN=AHSG PE=1 SV=1                                                    | sp P02765 FETUA_HUMAN        |
| 471 | Isoform 2 of Basigin OS=Homo sapiens GN=BSG                                                                  | sp P35613-2 BASI_HUMAN (+3)  |
| 472 | cAMP-dependent protein kinase type II-alpha regulatory subunit OS=Homo sapiens GN=PRKAR2A PE=1 SV=2          | sp P13861 KAP2_HUMAN (+1)    |

|     |                                                                                                                     |                              |
|-----|---------------------------------------------------------------------------------------------------------------------|------------------------------|
| 473 | Isoform 2 of 72 kDa type IV collagenase OS=Homo sapiens GN=MMP2                                                     | sp P08253-2 MMP2_HUMAN (+2)  |
| 474 | Keratin, type II cytoskeletal 5 OS=Homo sapiens GN=KRT5 PE=1 SV=3                                                   | sp P13647 K2C5_HUMAN         |
| 475 | Isoform 2 of Mitogen-activated protein kinase 1 OS=Homo sapiens GN=MAPK1                                            | sp P28482-2 MK01_HUMAN (+1)  |
| 476 | Isoform 2 of Nck-associated protein 1 OS=Homo sapiens GN=NCKAP1                                                     | sp Q9Y2A7-2 NCKP1_HUMAN (+1) |
| 477 | Dynein light chain 1, cytoplasmic OS=Homo sapiens GN=DYNLL1 PE=1 SV=1                                               | sp P63167 DYL1_HUMAN         |
| 478 | Isoform 2 of KH domain-containing, RNA-binding, signal transduction-associated protein 1 OS=Homo sapiens GN=KHDRBS1 | sp Q07666-2 KHDR1_HUMAN (+1) |
| 479 | 26S protease regulatory subunit 6A OS=Homo sapiens GN=PSMC3 PE=1 SV=3                                               | sp P17980 PRS6A_HUMAN (+2)   |
| 480 | Coatomer subunit delta OS=Homo sapiens GN=ARCN1 PE=1 SV=1                                                           | sp P48444 COPD_HUMAN (+1)    |
| 481 | Ubiquitin-like modifier-activating enzyme 6 OS=Homo sapiens GN=UBA6 PE=1 SV=1                                       | sp A0AVT1 UBA6_HUMAN         |
| 482 | Dolichyl-diphosphooligosaccharide--protein glycosyltransferase 48 kDa subunit OS=Homo sapiens GN=DDOST PE=1 SV=4    | sp P39656 OST48_HUMAN        |
| 483 | Heterogeneous nuclear ribonucleoprotein A3 OS=Homo sapiens GN=HNRNPA3 PE=1 SV=2                                     | sp P51991 ROA3_HUMAN         |
| 484 | Cytoskeleton-associated protein 4 OS=Homo sapiens GN=CKAP4 PE=1 SV=2                                                | sp Q07065 CKAP4_HUMAN        |
| 485 | Isoform 2 of Nexilin OS=Homo sapiens GN=NEXN                                                                        | sp Q0ZGT2-2 NEXN_HUMAN (+3)  |
| 486 | Isoform 3 of Basic leucine zipper and W2 domain-containing protein 1 OS=Homo sapiens GN=BZW1                        | sp Q7L1Q6-3 BZW1_HUMAN (+2)  |
| 487 | Keratin, type II cytoskeletal 6A OS=Homo sapiens GN=KRT6A PE=1 SV=3                                                 | sp P02538 K2C6A_HUMAN (+1)   |
| 488 | Isoform 2 of Mitotic checkpoint protein BUB3 OS=Homo sapiens GN=BUB3                                                | sp O43684-2 BUB3_HUMAN (+1)  |
| 489 | 60S ribosomal protein L3 OS=Homo sapiens GN=RPL3 PE=1 SV=2                                                          | sp P39023 RL3_HUMAN (+1)     |
| 490 | T-complex protein 1 subunit epsilon OS=Homo sapiens GN=CCT5 PE=1 SV=1                                               | sp P48643 TCPE_HUMAN (+4)    |
| 491 | Protein FAM49B OS=Homo sapiens GN=FAM49B PE=1 SV=1                                                                  | sp Q9NUQ9 FA49B_HUMAN        |
| 492 | 40S ribosomal protein S10 OS=Homo sapiens GN=RPS10 PE=1 SV=1                                                        | sp P46783 RS10_HUMAN (+2)    |
| 493 | Isoform 2 of Argininosuccinate lyase OS=Homo sapiens GN=ASL                                                         | sp P04424-2 ARLY_HUMAN (+2)  |
| 494 | Laminin subunit alpha-1 OS=Homo sapiens GN=LAMA1 PE=1 SV=2                                                          | sp P25391 LAMA1_HUMAN        |
| 495 | Retinal dehydrogenase 1 OS=Homo sapiens GN=ALDH1A1 PE=1 SV=2                                                        | sp P00352 AL1A1_HUMAN        |
| 496 | Leucine-rich alpha-2-glycoprotein OS=Homo sapiens GN=LRG1 PE=1 SV=2                                                 | sp P02750 A2GL_HUMAN         |
| 497 | Isoform Cytoplasmic+peroxisomal of Peroxiredoxin-5, mitochondrial OS=Homo sapiens GN=PRDX5                          | sp P30044-2 PRDX5_HUMAN (+1) |
| 498 | Proliferation-associated protein 2G4 OS=Homo sapiens GN=PA2G4 PE=1 SV=3                                             | sp Q9UQ80 PA2G4_HUMAN        |
| 499 | Carbonyl reductase [NADPH] 1 OS=Homo sapiens GN=CBR1 PE=1 SV=3                                                      | sp P16152 CBR1_HUMAN         |
| 500 | 40S ribosomal protein S3a OS=Homo sapiens GN=RPS3A PE=1 SV=2                                                        | sp P61247 RS3A_HUMAN (+6)    |
| 501 | Isoform 1 of Voltage-dependent anion-selective channel protein 2 OS=Homo sapiens GN=VDAC2                           | sp P45880-1 VDAC2_HUMAN (+2) |



|     |                                                                                                       |                              |
|-----|-------------------------------------------------------------------------------------------------------|------------------------------|
| 502 | Isoform 2 of Cytoplasmic FMR1-interacting protein 1 OS=Homo sapiens GN=CYFIP1                         | sp Q7L576-2 CYFP1_HUMAN (+1) |
| 503 | Aspartyl aminopeptidase OS=Homo sapiens GN=DNPEP PE=1 SV=1                                            | sp Q9ULA0 DNPEP_HUMAN (+1)   |
| 504 | 40S ribosomal protein S4, X isoform OS=Homo sapiens GN=RPS4X PE=1 SV=2                                | sp P62701 RS4X_HUMAN         |
| 505 | Adenosylhomocysteinase OS=Homo sapiens GN=AHCY PE=1 SV=4                                              | sp P23526 SAHH_HUMAN         |
| 506 | Calpain small subunit 1 OS=Homo sapiens GN=CAPNS1 PE=1 SV=1                                           | sp P04632 CPNS1_HUMAN (+1)   |
| 507 | Serine/arginine-rich splicing factor 1 OS=Homo sapiens GN=SRSF1 PE=1 SV=2                             | sp Q07955 SRSF1_HUMAN (+1)   |
| 508 | Proteasome subunit alpha type-5 OS=Homo sapiens GN=PSMA5 PE=1 SV=3                                    | sp P28066 PSA5_HUMAN         |
| 509 | Isoform 3 of Ubiquitin-conjugating enzyme E2 L3 OS=Homo sapiens GN=UBE2L3                             | sp P68036-3 UB2L3_HUMAN (+1) |
| 510 | Isoform 2 of Prothymosin alpha OS=Homo sapiens GN=PTMA                                                | sp P06454-2 PTMA_HUMAN (+5)  |
| 511 | Carboxypeptidase Q OS=Homo sapiens GN=CPQ PE=1 SV=1                                                   | sp Q9Y646 CBPQ_HUMAN         |
| 512 | 6-phosphogluconate dehydrogenase, decarboxylating OS=Homo sapiens GN=PGD PE=1 SV=3                    | sp P52209 6PGD_HUMAN (+1)    |
| 513 | Barrier-to-autointegration factor OS=Homo sapiens GN=BANF1 PE=1 SV=1                                  | sp O75531 BAF_HUMAN          |
| 514 | Rho GDP-dissociation inhibitor 1 OS=Homo sapiens GN=ARHGDI1 PE=1 SV=3                                 | sp P52565 GDIR1_HUMAN (+2)   |
| 515 | Protein S100-A11 OS=Homo sapiens GN=S100A11 PE=1 SV=2                                                 | sp P31949 S10AB_HUMAN        |
| 516 | Cytochrome b-c1 complex subunit 2, mitochondrial OS=Homo sapiens GN=UQCRC2 PE=1 SV=3                  | sp P22695 QCR2_HUMAN (+2)    |
| 517 | Corticosteroid-binding globulin OS=Homo sapiens GN=SERPINA6 PE=1 SV=1                                 | sp P08185 CBG_HUMAN          |
| 518 | Isoform 2 of Sarcolemmal membrane-associated protein OS=Homo sapiens GN=SLMAP                         | sp Q14BN4-2 SLMAP_HUMAN (+2) |
| 519 | 4-trimethylaminobutyraldehyde dehydrogenase OS=Homo sapiens GN=ALDH9A1 PE=1 SV=3                      | sp P49189 AL9A1_HUMAN        |
| 520 | Major vault protein OS=Homo sapiens GN=MVP PE=1 SV=4                                                  | sp Q14764 MVP_HUMAN          |
| 521 | Isoform MLC3 of Myosin light chain 1/3, skeletal muscle isoform OS=Homo sapiens GN=MYL1               | sp P05976-2 MYL1_HUMAN       |
| 522 | Transmembrane emp24 domain-containing protein 2 OS=Homo sapiens GN=TMED2 PE=1 SV=1                    | sp Q15363 TMED2_HUMAN (+1)   |
| 523 | Isoform 2 of Transcription intermediary factor 1-beta OS=Homo sapiens GN=TRIM28                       | sp Q13263-2 TIF1B_HUMAN (+2) |
| 524 | Ribonuclease inhibitor OS=Homo sapiens GN=RNH1 PE=1 SV=2                                              | sp P13489 RINI_HUMAN         |
| 525 | Isoform 2 of LIM and senescent cell antigen-like-containing domain protein 2 OS=Homo sapiens GN=LIMS2 | sp Q7Z4I7-2 LIMS2_HUMAN (+4) |
| 526 | Isoform 3 of H/ACA ribonucleoprotein complex subunit 4 OS=Homo sapiens GN=DKC1                        | sp O60832-2 DKC1_HUMAN (+3)  |
| 527 | Fatty acid-binding protein, epidermal OS=Homo sapiens GN=FABP5 PE=1 SV=3                              | sp Q01469 FABP5_HUMAN        |
| 528 | Copine-1 OS=Homo sapiens GN=CPNE1 PE=1 SV=1                                                           | sp Q99829 CPNE1_HUMAN (+3)   |
| 529 | Tight junction protein 1 (Zona occludens 1), isoform CRA_a OS=Homo sapiens GN=TJP1 PE=2 SV=1          | tr G3V1L9 G3V1L9_HUMAN (+3)  |
| 530 | Isoform 2 of Phosphatidylinositol-binding clathrin assembly protein OS=Homo sapiens GN=PICALM         | sp Q13492-2 PICAL_HUMAN (+3) |
| 531 | Isoform 2 of Xaa-Pro aminopeptidase 1 OS=Homo sapiens GN=XPNPEP1                                      | sp Q9NQW7-2 XPP1_HUMAN (+4)  |

|     |                                                                                                                |                              |
|-----|----------------------------------------------------------------------------------------------------------------|------------------------------|
| 532 | CD81 antigen (Fragment) OS=Homo sapiens GN=CD81 PE=4 SV=1                                                      | tr H0YDL9 H0YDL9_HUMAN       |
| 533 | Heterogeneous nuclear ribonucleoprotein A1-like 2 OS=Homo sapiens GN=HNRNPA1L2 PE=2 SV=2                       | sp Q32P51 RA1L2_HUMAN        |
| 534 | Histidine-rich glycoprotein OS=Homo sapiens GN=HRG PE=1 SV=1                                                   | sp P04196 HRG_HUMAN          |
| 535 | Target of Nesh-SH3 OS=Homo sapiens GN=ABI3BP PE=1 SV=1                                                         | sp Q7Z7G0 TARSH_HUMAN (+1)   |
| 536 | Isoform 2 of Splicing factor U2AF 65 kDa subunit OS=Homo sapiens GN=U2AF2                                      | sp P26368-2 U2AF2_HUMAN (+2) |
| 537 | Complement component C7 OS=Homo sapiens GN=C7 PE=1 SV=2                                                        | sp P10643 CO7_HUMAN          |
| 538 | Isoform 2 of Niban-like protein 1 OS=Homo sapiens GN=FAM129B                                                   | sp Q96TA1-2 NIBL1_HUMAN (+1) |
| 539 | Histone deacetylase 2 OS=Homo sapiens GN=HDAC2 PE=2 SV=1                                                       | tr J3KPW7 J3KPW7_HUMAN       |
| 540 | Isoform 4 of Cadherin-13 OS=Homo sapiens GN=CDH13                                                              | sp P55290-4 CAD13_HUMAN (+1) |
| 541 | Alpha-2-antiplasmin OS=Homo sapiens GN=SERPINF2 PE=1 SV=3                                                      | sp P08697 A2AP_HUMAN (+1)    |
| 542 | Isoform 2 of COP9 signalosome complex subunit 3 OS=Homo sapiens GN=COPS3                                       | sp Q9UNS2-2 CSN3_HUMAN (+1)  |
| 543 | Protein NDRG1 OS=Homo sapiens GN=NDRG1 PE=1 SV=1                                                               | sp Q92597 NDRG1_HUMAN        |
| 544 | Isoform Gnas-2 of Guanine nucleotide-binding protein G(s) subunit alpha isoforms short OS=Homo sapiens GN=GNAS | sp P63092-2 GNAS2_HUMAN (+5) |
| 545 | Isoform 2 of Septin-11 OS=Homo sapiens GN=SEPT11                                                               | sp Q9NVA2-2 SEP11_HUMAN (+3) |
| 546 | Immunoglobulin superfamily containing leucine-rich repeat protein OS=Homo sapiens GN=ISLR PE=1 SV=1            | sp O14498 ISLR_HUMAN         |
| 547 | 40S ribosomal protein S26 OS=Homo sapiens GN=RPS26 PE=1 SV=3                                                   | sp P62854 RS26_HUMAN (+1)    |
| 548 | Isoform 2 of Actin-related protein 2/3 complex subunit 5 OS=Homo sapiens GN=ARPC5                              | sp O15511-2 ARPC5_HUMAN (+2) |
| 549 | HLA class I histocompatibility antigen, A-2 alpha chain OS=Homo sapiens GN=HLA-A PE=1 SV=1                     | sp P01892 1A02_HUMAN (+1)    |
| 550 | Elongation factor 1-beta OS=Homo sapiens GN=EEF1B2 PE=1 SV=3                                                   | sp P24534 EF1B_HUMAN         |
| 551 | Isoform 2 of Secernin-1 OS=Homo sapiens GN=SCRN1                                                               | sp Q12765-2 SCRN1_HUMAN (+1) |
| 552 | Tumor necrosis factor alpha-induced protein 8-like protein 3 OS=Homo sapiens GN=TNFAIP8L3 PE=2 SV=1            | sp Q5GJ75 TP8L3_HUMAN        |
| 553 | Nucleoredoxin OS=Homo sapiens GN=NXN PE=1 SV=2                                                                 | sp Q6DKJ4 NXN_HUMAN          |
| 554 | Acylamino-acid-releasing enzyme OS=Homo sapiens GN=APEH PE=2 SV=1                                              | tr C9JIF9 C9JIF9_HUMAN       |
| 555 | Isoform 2 of NADH-ubiquinone oxidoreductase 75 kDa subunit, mitochondrial OS=Homo sapiens GN=NDUFS1            | sp P28331-2 NDUS1_HUMAN (+5) |
| 556 | Destrin OS=Homo sapiens GN=DSTN PE=1 SV=3                                                                      | sp P60981 DEST_HUMAN         |
| 557 | Nucleoprotein TPR OS=Homo sapiens GN=TPR PE=1 SV=3                                                             | sp P12270 TPR_HUMAN          |
| 558 | Superoxide dismutase [Cu-Zn] OS=Homo sapiens GN=SOD1 PE=1 SV=2                                                 | sp P00441 SODC_HUMAN (+1)    |
| 559 | Glutamine--tRNA ligase OS=Homo sapiens GN=QARS PE=1 SV=1                                                       | sp P47897 SYQ_HUMAN (+1)     |

|     |                                                                                                            |                              |
|-----|------------------------------------------------------------------------------------------------------------|------------------------------|
| 560 | Isoform 2 of Synemin OS=Homo sapiens GN=SYNM                                                               | sp O15061-2 SYNEM_HUMAN (+3) |
| 561 | 26S proteasome non-ATPase regulatory subunit 6 OS=Homo sapiens GN=PSMD6 PE=1 SV=1                          | sp Q15008 PSMD6_HUMAN (+1)   |
| 562 | Transmembrane protein 43 OS=Homo sapiens GN=TMEM43 PE=1 SV=1                                               | sp Q9BTV4 TMM43_HUMAN        |
| 563 | Isoform 2 of Pyridoxal kinase OS=Homo sapiens GN=PDXK                                                      | sp O00764-2 PDXK_HUMAN (+2)  |
| 564 | COP9 signalosome complex subunit 5 OS=Homo sapiens GN=COPS5 PE=1 SV=4                                      | sp Q92905 CSN5_HUMAN         |
| 565 | Isoform 2 of 40S ribosomal protein S3 OS=Homo sapiens GN=RPS3                                              | sp P23396-2 RS3_HUMAN (+2)   |
| 566 | Isoform 2 of Heterogeneous nuclear ribonucleoprotein H3 OS=Homo sapiens GN=HNRNPH3                         | sp P31942-2 HNRH3_HUMAN (+2) |
| 567 | Phosphatidylethanolamine-binding protein 1 OS=Homo sapiens GN=PEBP1 PE=1 SV=3                              | sp P30086 PEBP1_HUMAN        |
| 568 | LIM and cysteine-rich domains protein 1 OS=Homo sapiens GN=LMCD1 PE=1 SV=1                                 | sp Q9NZU5 LMCD1_HUMAN (+1)   |
| 569 | Carbonic anhydrase 3 OS=Homo sapiens GN=CA3 PE=1 SV=3                                                      | sp P07451 CAH3_HUMAN         |
| 570 | V-type proton ATPase subunit B, brain isoform OS=Homo sapiens GN=ATP6V1B2 PE=1 SV=3                        | sp P21281 VATB2_HUMAN        |
| 571 | Isoform 2 of Protein arginine N-methyltransferase 5 OS=Homo sapiens GN=PRMT5                               | sp O14744-2 ANM5_HUMAN (+4)  |
| 572 | Isoform 2 of Protein arginine N-methyltransferase 1 OS=Homo sapiens GN=PRMT1                               | sp Q99873-2 ANM1_HUMAN (+7)  |
| 573 | Beta-2-syntrophin OS=Homo sapiens GN=SNTB2 PE=1 SV=1                                                       | sp Q13425 SNTB2_HUMAN        |
| 574 | Glycine--tRNA ligase OS=Homo sapiens GN=GARS PE=1 SV=3                                                     | sp P41250 SYG_HUMAN          |
| 575 | Isoform 2 of Xaa-Pro dipeptidase OS=Homo sapiens GN=PEPD                                                   | sp P12955-2 PEPD_HUMAN (+1)  |
| 576 | Isoform 2 of Actin-like protein 6A OS=Homo sapiens GN=ACTL6A                                               | sp O96019-2 ACL6A_HUMAN (+1) |
| 577 | Glucose 1,6-bisphosphate synthase OS=Homo sapiens GN=PGM2L1 PE=1 SV=3                                      | sp Q6PCE3 PGM2L_HUMAN        |
| 578 | Macrophage-capping protein OS=Homo sapiens GN=CAPG PE=1 SV=2                                               | sp P40121 CAPG_HUMAN (+1)    |
| 579 | Putative pre-mRNA-splicing factor ATP-dependent RNA helicase DHX15 OS=Homo sapiens GN=DHX15 PE=1 SV=2      | sp O43143 DHX15_HUMAN        |
| 580 | Coatomer subunit beta' OS=Homo sapiens GN=COPB2 PE=1 SV=2                                                  | sp P35606 COPB2_HUMAN (+1)   |
| 581 | Isoform 2 of CAP-Gly domain-containing linker protein 1 OS=Homo sapiens GN=CLIP1                           | sp P30622-1 CLIP1_HUMAN (+2) |
| 582 | 26S protease regulatory subunit 4 OS=Homo sapiens GN=PSMC1 PE=1 SV=1                                       | sp P62191 PRS4_HUMAN (+1)    |
| 583 | Peptidyl-prolyl cis-trans isomerase FKBP4 OS=Homo sapiens GN=FKBP4 PE=1 SV=3                               | sp Q02790 FKBP4_HUMAN        |
| 584 | Aldose reductase OS=Homo sapiens GN=AKR1B1 PE=1 SV=3                                                       | sp P15121 ALDR_HUMAN         |
| 585 | Chromobox protein homolog 1 OS=Homo sapiens GN=CBX1 PE=1 SV=1                                              | sp P83916 CBX1_HUMAN (+2)    |
| 586 | Isoform 2 of Cullin-2 OS=Homo sapiens GN=CUL2                                                              | sp Q13617-2 CUL2_HUMAN (+2)  |
| 587 | NHL repeat-containing protein 2 OS=Homo sapiens GN=NHLRC2 PE=1 SV=1                                        | sp Q8NBF2 NHLRC2_HUMAN       |
| 588 | Interferon-induced guanylate-binding protein 1 OS=Homo sapiens GN=GBP1 PE=1 SV=2                           | sp P32455 GBP1_HUMAN         |
| 589 | Ubiquitin carboxyl-terminal hydrolase 7 OS=Homo sapiens GN=USP7 PE=1 SV=2                                  | sp Q93009 UBP7_HUMAN (+3)    |
| 590 | Serine/threonine-protein phosphatase 2A catalytic subunit beta isoform OS=Homo sapiens GN=PPP2CB PE=1 SV=1 | sp P62714 PP2AB_HUMAN (+2)   |

|     |                                                                                                            |                              |
|-----|------------------------------------------------------------------------------------------------------------|------------------------------|
| 591 | Isoform 3 of Retinal dehydrogenase 2 OS=Homo sapiens GN=ALDH1A2                                            | sp O94788-3 AL1A2_HUMAN (+3) |
| 592 | 60S ribosomal protein L12 OS=Homo sapiens GN=RPL12 PE=1 SV=1                                               | sp P30050 RL12_HUMAN         |
| 593 | Prostaglandin reductase 1 OS=Homo sapiens GN=PTGR1 PE=1 SV=2                                               | sp Q14914 PTGR1_HUMAN        |
| 594 | Zinc-alpha-2-glycoprotein OS=Homo sapiens GN=AZGP1 PE=1 SV=2                                               | sp P25311 ZA2G_HUMAN         |
| 595 | Alpha-soluble NSF attachment protein OS=Homo sapiens GN=NAPA PE=1 SV=3                                     | sp P54920 SNAA_HUMAN (+2)    |
| 596 | Isoform 2 of 26S protease regulatory subunit 8 OS=Homo sapiens GN=PSMC5                                    | sp P62195-2 PRS8_HUMAN (+1)  |
| 597 | 60S acidic ribosomal protein P2 OS=Homo sapiens GN=RPLP2 PE=1 SV=1                                         | sp P05387 RLA2_HUMAN         |
| 598 | Succinate dehydrogenase [ubiquinone] flavoprotein subunit, mitochondrial OS=Homo sapiens GN=SDHA PE=1 SV=2 | sp P31040 DHSA_HUMAN (+2)    |
| 599 | Isoform PBX1b of Pre-B-cell leukemia transcription factor 1 OS=Homo sapiens GN=PBX1                        | sp P40424-2 PBX1_HUMAN (+4)  |
| 600 | Isoform 2 of Ras-related protein Rab-5C OS=Homo sapiens GN=RAB5C                                           | sp P51148-2 RAB5C_HUMAN (+1) |
| 601 | 60S ribosomal protein L30 OS=Homo sapiens GN=RPL30 PE=1 SV=2                                               | sp P62888 RL30_HUMAN         |
| 602 | Tropomyosin alpha-4 chain OS=Homo sapiens GN=TPM4 PE=1 SV=3                                                | sp P67936 TPM4_HUMAN         |
| 603 | ADP-ribosylation factor 5 OS=Homo sapiens GN=ARF5 PE=1 SV=2                                                | sp P84085 ARF5_HUMAN (+1)    |
| 604 | Alpha/beta hydrolase domain-containing protein 14B OS=Homo sapiens GN=ABHD14B PE=1 SV=1                    | sp Q96IU4 ABHEB_HUMAN (+2)   |
| 605 | Junctophilin-2 OS=Homo sapiens GN=JPH2 PE=1 SV=2                                                           | sp Q9BR39 JPH2_HUMAN         |
| 606 | Isoform 2 of E3 ubiquitin-protein ligase CHIP OS=Homo sapiens GN=STUB1                                     | sp Q9UNE7-2 CHIP_HUMAN (+3)  |
| 607 | Ig kappa chain V-III region WOL OS=Homo sapiens PE=1 SV=1                                                  | sp P01623 KV305_HUMAN (+1)   |
| 608 | Transthyretin OS=Homo sapiens GN=TTR PE=1 SV=1                                                             | sp P02766 TTHY_HUMAN         |
| 609 | Isoform 2 of Electron transfer flavoprotein subunit alpha, mitochondrial OS=Homo sapiens GN=ETFA           | sp P13804-2 ETFA_HUMAN (+2)  |
| 610 | S-phase kinase-associated protein 1 OS=Homo sapiens GN=SKP1 PE=1 SV=2                                      | sp P63208 SKP1_HUMAN (+1)    |
| 611 | Core histone macro-H2A.2 OS=Homo sapiens GN=H2AFY2 PE=1 SV=3                                               | sp Q9P0M6 H2AW_HUMAN         |
| 612 | Heme-binding protein 2 OS=Homo sapiens GN=HEBP2 PE=1 SV=1                                                  | sp Q9Y5Z4 HEBP2_HUMAN        |
| 613 | Importin subunit alpha-4 OS=Homo sapiens GN=KPNA3 PE=1 SV=2                                                | sp O00505 IMA4_HUMAN         |
| 614 | Isoform 2 of Thymidine phosphorylase OS=Homo sapiens GN=TYMP                                               | sp P19971-2 TYPH_HUMAN (+2)  |
| 615 | Isoform 2 of Glutathione synthetase OS=Homo sapiens GN=GSS                                                 | sp P48637-2 GSHB_HUMAN (+2)  |
| 616 | Eukaryotic translation initiation factor 3 subunit G OS=Homo sapiens GN=EIF3G PE=1 SV=2                    | sp O75821 EIF3G_HUMAN (+3)   |
| 617 | Isoform 2 of 26S proteasome non-ATPase regulatory subunit 13 OS=Homo sapiens GN=PSMD13                     | sp Q9UNM6-2 PSD13_HUMAN (+1) |
| 618 | Histone-binding protein RBBP7 OS=Homo sapiens GN=RBBP7 PE=1 SV=1                                           | sp Q16576 RBBP7_HUMAN (+1)   |
| 619 | Aflatoxin B1 aldehyde reductase member 2 OS=Homo sapiens GN=AKR7A2 PE=1 SV=3                               | sp O43488 ARK72_HUMAN (+1)   |
| 620 | Vacuolar protein sorting-associated protein 26A OS=Homo sapiens GN=VPS26A PE=1 SV=2                        | sp O75436 VP26A_HUMAN (+2)   |

|     |                                                                                                        |                               |
|-----|--------------------------------------------------------------------------------------------------------|-------------------------------|
| 621 | Alpha-N-acetylgalactosaminidase OS=Homo sapiens GN=NAGA PE=1 SV=2                                      | sp P17050 NAGAB_HUMAN         |
| 622 | Isoform 2 of Multifunctional protein ADE2 OS=Homo sapiens GN=PAICS                                     | sp P22234-2 PUR6_HUMAN (+1)   |
| 623 | Probable ATP-dependent RNA helicase DDX6 OS=Homo sapiens GN=DDX6 PE=1 SV=2                             | sp P26196 DDX6_HUMAN          |
| 624 | Aldo-keto reductase family 1 member C3 OS=Homo sapiens GN=AKR1C3 PE=1 SV=4                             | sp P42330 AK1C3_HUMAN (+2)    |
| 625 | Isoform 3 of Exportin-2 OS=Homo sapiens GN=CSE1L                                                       | sp P55060-3 XPO2_HUMAN (+2)   |
| 626 | Eukaryotic translation initiation factor 3 subunit I OS=Homo sapiens GN=EIF3I PE=1 SV=1                | sp Q13347 EIF3I_HUMAN         |
| 627 | Isoform 2 of Coiled-coil domain-containing protein 80 OS=Homo sapiens GN=CCDC80                        | sp Q76M96-2 CCD80_HUMAN (+1)  |
| 628 | Isoform 2 of COP9 signalosome complex subunit 4 OS=Homo sapiens GN=COPS4                               | sp Q9BT78-2 CSN4_HUMAN (+3)   |
| 629 | 26S proteasome non-ATPase regulatory subunit 7 OS=Homo sapiens GN=PSMD7 PE=1 SV=2                      | sp P51665 PSMD7_HUMAN         |
| 630 | Serum amyloid P-component OS=Homo sapiens GN=APCS PE=1 SV=2                                            | sp P02743 SAMP_HUMAN          |
| 631 | Isoform 2 of SWI/SNF complex subunit SMARCC2 OS=Homo sapiens GN=SMARCC2                                | sp Q8TAQ2-2 SMRC2_HUMAN (+3)  |
| 632 | Matrix-remodeling-associated protein 5 OS=Homo sapiens GN=MXRA5 PE=2 SV=3                              | sp Q9NR99 MXRA5_HUMAN         |
| 633 | Isoform 10 of CD44 antigen OS=Homo sapiens GN=CD44                                                     | sp P16070-10 CD44_HUMAN (+21) |
| 634 | Serine/threonine-protein kinase MST4 OS=Homo sapiens GN=MST4 PE=1 SV=2                                 | sp Q9P289 MST4_HUMAN (+3)     |
| 635 | Isoform 5 of Sex hormone-binding globulin OS=Homo sapiens GN=SHBG                                      | sp P04278-5 SHBG_HUMAN (+2)   |
| 636 | Beta-centractin OS=Homo sapiens GN=ACTR1B PE=1 SV=1                                                    | sp P42025 ACTY_HUMAN          |
| 637 | tRNA-splicing ligase RtcB homolog OS=Homo sapiens GN=RTCB PE=1 SV=1                                    | sp Q9Y310 RTCB_HUMAN          |
| 638 | Complement component C8 alpha chain OS=Homo sapiens GN=C8A PE=1 SV=2                                   | sp P07357 CO8A_HUMAN          |
| 639 | Pre-mRNA-processing factor 19 OS=Homo sapiens GN=PRPF19 PE=1 SV=1                                      | sp Q9UMS4 PRP19_HUMAN         |
| 640 | Epidermal growth factor receptor kinase substrate 8 OS=Homo sapiens GN=EPS8 PE=1 SV=1                  | sp Q12929 EPS8_HUMAN          |
| 641 | Neurocalcin-delta OS=Homo sapiens GN=NCALD PE=2 SV=2                                                   | sp P61601 NCALD_HUMAN (+1)    |
| 642 | Isoform 3 of Aldehyde dehydrogenase family 16 member A1 OS=Homo sapiens GN=ALDH16A1                    | sp Q8IZ83-3 A16A1_HUMAN (+3)  |
| 643 | Alpha-N-acetylglucosaminidase OS=Homo sapiens GN=NAGLU PE=1 SV=2                                       | sp P54802 ANAG_HUMAN          |
| 644 | Isoform 2 of UDP-glucose:glycoprotein glucosyltransferase 1 OS=Homo sapiens GN=UGGT1                   | sp Q9NYU2-2 UGGG1_HUMAN (+1)  |
| 645 | Complement C1s subcomponent OS=Homo sapiens GN=C1S PE=1 SV=1                                           | sp P09871 C1S_HUMAN (+1)      |
| 646 | Isoform Beta of Signal transducer and activator of transcription 1-alpha/beta OS=Homo sapiens GN=STAT1 | sp P42224-2 STAT1_HUMAN (+2)  |
| 647 | Isoform 2 of Sarcoplasmic/endoplasmic reticulum calcium ATPase 2 OS=Homo sapiens GN=ATP2A2             | sp P16615-2 AT2A2_HUMAN (+5)  |
| 648 | Pre-mRNA branch site protein p14 OS=Homo sapiens GN=SF3B14 PE=1 SV=1                                   | sp Q9Y3B4 PM14_HUMAN          |
| 649 | Keratin, type I cytoskeletal 16 OS=Homo sapiens GN=KRT16 PE=1 SV=4                                     | sp P08779 K1C16_HUMAN         |
| 650 | Isoform 2 of Heterochromatin protein 1-binding protein 3 OS=Homo sapiens GN=HP1BP3                     | sp Q5SSJ5-2 HP1B3_HUMAN (+3)  |

|     |                                                                                                            |                              |
|-----|------------------------------------------------------------------------------------------------------------|------------------------------|
| 651 | Isoform 2 of Calmodulin-regulated spectrin-associated protein 2 OS=Homo sapiens GN=CAMSAP2                 | sp Q08AD1-2 CAMP2_HUMAN (+2) |
| 652 | 40S ribosomal protein S2 OS=Homo sapiens GN=RPS2 PE=1 SV=2                                                 | sp P15880 RS2_HUMAN (+2)     |
| 653 | Isoform 2 of Sushi repeat-containing protein SRPX OS=Homo sapiens GN=SRPX                                  | sp P78539-2 SRPX_HUMAN (+3)  |
| 654 | EF-hand domain-containing protein D1 OS=Homo sapiens GN=EFHD1 PE=1 SV=1                                    | sp Q9BUP0 EFHD1_HUMAN        |
| 655 | Tripeptidyl-peptidase 1 OS=Homo sapiens GN=TPP1 PE=1 SV=2                                                  | sp O14773 TPP1_HUMAN         |
| 656 | Actin-related protein 2/3 complex subunit 1B OS=Homo sapiens GN=ARPC1B PE=1 SV=3                           | sp O15143 ARC1B_HUMAN        |
| 657 | Isoform 2 of Eukaryotic translation initiation factor 3 subunit L OS=Homo sapiens GN=EIF3L                 | sp Q9Y262-2 EIF3L_HUMAN (+2) |
| 658 | Pyruvate dehydrogenase phosphatase regulatory subunit, mitochondrial OS=Homo sapiens GN=PDPR PE=1 SV=2     | sp Q8NCN5 PDPR_HUMAN (+1)    |
| 659 | Nodal modulator 1 OS=Homo sapiens GN=NOMO1 PE=1 SV=5                                                       | sp Q15155 NOMO1_HUMAN        |
| 660 | Isoform Long of Glucose-6-phosphate 1-dehydrogenase OS=Homo sapiens GN=G6PD                                | sp P11413-2 G6PD_HUMAN (+5)  |
| 661 | Dolichyl-diphosphooligosaccharide--protein glycosyltransferase subunit 1 OS=Homo sapiens GN=RPN1 PE=1 SV=1 | sp P04843 RPN1_HUMAN         |
| 662 | PDZ and LIM domain protein 1 OS=Homo sapiens GN=PDLIM1 PE=1 SV=4                                           | sp O00151 PDLI1_HUMAN        |
| 663 | Cystatin-B OS=Homo sapiens GN=CSTB PE=1 SV=2                                                               | sp P04080 CYTB_HUMAN         |
| 664 | Ectonucleotide pyrophosphatase/phosphodiesterase family member 1 OS=Homo sapiens GN=ENPP1 PE=1 SV=2        | sp P22413 ENPP1_HUMAN        |
| 665 | UMP-CMP kinase OS=Homo sapiens GN=CMPK1 PE=1 SV=3                                                          | sp P30085 KCY_HUMAN          |
| 666 | Peroxiredoxin-2 OS=Homo sapiens GN=PRDX2 PE=1 SV=5                                                         | sp P32119 PRDX2_HUMAN        |
| 667 | 14-3-3 protein eta OS=Homo sapiens GN=YWHAH PE=1 SV=4                                                      | sp Q04917 1433F_HUMAN        |
| 668 | Isoform 2 of Nuclear pore complex protein Nup93 OS=Homo sapiens GN=NUP93                                   | sp Q8N1F7-2 NUP93_HUMAN (+3) |
| 669 | Cytosolic non-specific dipeptidase OS=Homo sapiens GN=CNDP2 PE=1 SV=2                                      | sp Q96KP4 CNDP2_HUMAN        |
| 670 | Laminin subunit gamma-3 OS=Homo sapiens GN=LAMC3 PE=1 SV=3                                                 | sp Q9Y6N6 LAMC3_HUMAN (+1)   |
| 671 | COP9 signalosome complex subunit 2 OS=Homo sapiens GN=COPS2 PE=2 SV=1                                      | tr B4DIH5 B4DIH5_HUMAN       |
| 672 | Glutathione S-transferase Mu 2 OS=Homo sapiens GN=GSTM2 PE=1 SV=2                                          | sp P28161 GSTM2_HUMAN (+1)   |
| 673 | Isoform 5 of Tropomyosin alpha-3 chain OS=Homo sapiens GN=TPM3                                             | sp P06753-5 TPM3_HUMAN       |
| 674 | Spermine synthase OS=Homo sapiens GN=SMS PE=1 SV=2                                                         | sp P52788 SPSY_HUMAN (+2)    |
| 675 | Lysosome membrane protein 2 OS=Homo sapiens GN=SCARB2 PE=1 SV=2                                            | sp Q14108 SCRB2_HUMAN        |
| 676 | ATP-dependent DNA helicase Q1 OS=Homo sapiens GN=RECQL PE=1 SV=3                                           | sp P46063 RECQ1_HUMAN        |
| 677 | Adenine phosphoribosyltransferase OS=Homo sapiens GN=APRT PE=1 SV=2                                        | sp P07741 APT_HUMAN (+1)     |
| 678 | Isoform Short of Endoglin OS=Homo sapiens GN=ENG                                                           | sp P17813-2 EGLN_HUMAN (+1)  |

|     |                                                                                                         |                              |
|-----|---------------------------------------------------------------------------------------------------------|------------------------------|
| 679 | Platelet-activating factor acetylhydrolase IB subunit alpha OS=Homo sapiens GN=PFAFH1B1 PE=1 SV=2       | sp P43034 LIS1_HUMAN         |
| 680 | 40S ribosomal protein S9 OS=Homo sapiens GN=RPS9 PE=1 SV=3                                              | sp P46781 RS9_HUMAN          |
| 681 | Serine--tRNA ligase, cytoplasmic OS=Homo sapiens GN=SARS PE=1 SV=3                                      | sp P49591 SYSC_HUMAN (+1)    |
| 682 | Transforming protein RhoA OS=Homo sapiens GN=RHOA PE=1 SV=1                                             | sp P61586 RHOA_HUMAN         |
| 683 | Complement component 1 Q subcomponent-binding protein, mitochondrial OS=Homo sapiens GN=C1QBP PE=1 SV=1 | sp Q07021 C1QBP_HUMAN        |
| 684 | Guanine nucleotide-binding protein G(I)/G(S)/G(O) subunit gamma-12 OS=Homo sapiens GN=GNG12 PE=1 SV=3   | sp Q9UBI6 GBG12_HUMAN        |
| 685 | Peroxiredoxin-4 (Fragment) OS=Homo sapiens GN=PRDX4 PE=4 SV=1                                           | tr H7C3T4 H7C3T4_HUMAN (+1)  |
| 686 | Isoform Del-701 of Signal transducer and activator of transcription 3 OS=Homo sapiens GN=STAT3          | sp P40763-2 STAT3_HUMAN (+3) |
| 687 | Tubulin-specific chaperone A OS=Homo sapiens GN=TBCA PE=1 SV=3                                          | sp O75347 TBCA_HUMAN (+3)    |
| 688 | Unconventional myosin-Ig OS=Homo sapiens GN=MYO1G PE=1 SV=2                                             | sp B011T2 MYO1G_HUMAN        |
| 689 | Eukaryotic translation initiation factor 3 subunit F OS=Homo sapiens GN=EIF3F PE=1 SV=1                 | sp O00303 EIF3F_HUMAN (+2)   |
| 690 | Isoform 2 of Proteasome subunit alpha type-7 OS=Homo sapiens GN=PSMA7                                   | sp O14818-2 PSA7_HUMAN (+2)  |
| 691 | Isoform 2 of Protein transport protein Sec24D OS=Homo sapiens GN=SEC24D                                 | sp O94855-2 SC24D_HUMAN (+3) |
| 692 | GDH/6PGL endoplasmic bifunctional protein OS=Homo sapiens GN=H6PD PE=1 SV=2                             | sp O95479 G6PE_HUMAN (+1)    |
| 693 | Adenylate kinase isoenzyme 1 OS=Homo sapiens GN=AK1 PE=1 SV=3                                           | sp P00568 KAD1_HUMAN (+1)    |
| 694 | Retinol-binding protein 4 OS=Homo sapiens GN=RBP4 PE=1 SV=3                                             | sp P02753 RET4_HUMAN (+1)    |
| 695 | Metallothionein-1A OS=Homo sapiens GN=MT1A PE=1 SV=2                                                    | sp P04731 MT1A_HUMAN         |
| 696 | Complement factor I OS=Homo sapiens GN=CFI PE=1 SV=2                                                    | sp P05156 CFAI_HUMAN (+2)    |
| 697 | Apolipoprotein A-IV OS=Homo sapiens GN=APOA4 PE=1 SV=3                                                  | sp P06727 APOA4_HUMAN        |
| 698 | Isoform 2 of 6-phosphofructokinase, muscle type OS=Homo sapiens GN=PFKM                                 | sp P08237-2 K6PF_HUMAN (+2)  |
| 699 | Annexin A4 OS=Homo sapiens GN=ANXA4 PE=1 SV=4                                                           | sp P09525 ANXA4_HUMAN (+2)   |
| 700 | Insulin-degrading enzyme OS=Homo sapiens GN=IDE PE=1 SV=4                                               | sp P14735 IDE_HUMAN          |
| 701 | Ezrin OS=Homo sapiens GN=EZR PE=1 SV=4                                                                  | sp P15311 EZRI_HUMAN (+1)    |
| 702 | E3 ubiquitin-protein ligase TRIM21 OS=Homo sapiens GN=TRIM21 PE=1 SV=1                                  | sp P19474 RO52_HUMAN (+1)    |
| 703 | Tryptase beta-2 OS=Homo sapiens GN=TPSB2 PE=1 SV=2                                                      | sp P20231 TRYB2_HUMAN (+3)   |
| 704 | rRNA 2'-O-methyltransferase fibrillarin OS=Homo sapiens GN=FBL PE=1 SV=2                                | sp P22087 FBRL_HUMAN (+3)    |
| 705 | Isoform 2 of 60S ribosomal protein L13 OS=Homo sapiens GN=RPL13                                         | sp P26373-2 RL13_HUMAN (+1)  |
| 706 | Cellular retinoic acid-binding protein 2 OS=Homo sapiens GN=CRABP2 PE=1 SV=2                            | sp P29373 RABP2_HUMAN (+1)   |
| 707 | Guanine nucleotide-binding protein-like 1 OS=Homo sapiens GN=GNL1 PE=1 SV=2                             | sp P36915 GNL1_HUMAN         |

|     |                                                                                                         |                              |
|-----|---------------------------------------------------------------------------------------------------------|------------------------------|
| 708 | Isoform 2 of Lysosomal Pro-X carboxypeptidase OS=Homo sapiens GN=PRCP                                   | sp P42785-2 PCP_HUMAN (+2)   |
| 709 | Guanine nucleotide-binding protein G(q) subunit alpha OS=Homo sapiens GN=GNAQ PE=1 SV=4                 | sp P50148 GNAQ_HUMAN         |
| 710 | Isoform 2 of Rap1 GTPase-GDP dissociation stimulator 1 OS=Homo sapiens GN=RAP1GDS1                      | sp P52306-2 GDS1_HUMAN (+5)  |
| 711 | Developmentally-regulated GTP-binding protein 2 OS=Homo sapiens GN=DRG2 PE=1 SV=1                       | sp P55039 DRG2_HUMAN (+1)    |
| 712 | Methionine--tRNA ligase, cytoplasmic OS=Homo sapiens GN=MARS PE=1 SV=2                                  | sp P56192 SYMC_HUMAN (+1)    |
| 713 | Eukaryotic translation initiation factor 6 OS=Homo sapiens GN=EIF6 PE=1 SV=1                            | sp P56537 IF6_HUMAN          |
| 714 | Isoform 2 of Actin-related protein 2/3 complex subunit 4 OS=Homo sapiens GN=ARPC4                       | sp P59998-2 ARPC4_HUMAN (+4) |
| 715 | Eukaryotic translation initiation factor 3 subunit E OS=Homo sapiens GN=EIF3E PE=1 SV=1                 | sp P60228 EIF3E_HUMAN (+1)   |
| 716 | Protein mago nashi homolog OS=Homo sapiens GN=MAGOH PE=1 SV=1                                           | sp P61326 MGN_HUMAN (+2)     |
| 717 | Isoform 2 of Serine/threonine-protein phosphatase PP1-alpha catalytic subunit OS=Homo sapiens GN=PPP1CA | sp P62136-2 PP1A_HUMAN (+4)  |
| 718 | 40S ribosomal protein S16 OS=Homo sapiens GN=RPS16 PE=1 SV=2                                            | sp P62249 RS16_HUMAN (+1)    |
| 719 | 40S ribosomal protein S23 OS=Homo sapiens GN=RPS23 PE=1 SV=3                                            | sp P62266 RS23_HUMAN (+1)    |
| 720 | Eukaryotic peptide chain release factor subunit 1 OS=Homo sapiens GN=ETF1 PE=1 SV=3                     | sp P62495 ERF1_HUMAN (+2)    |
| 721 | Isoform 2 of Ras-related protein Rab-1A OS=Homo sapiens GN=RAB1A                                        | sp P62820-2 RAB1A_HUMAN (+3) |
| 722 | SUMO-conjugating enzyme UBC9 OS=Homo sapiens GN=UBE2I PE=1 SV=1                                         | sp P63279 UBC9_HUMAN (+3)    |
| 723 | 1,4-alpha-glucan-branching enzyme OS=Homo sapiens GN=GBE1 PE=1 SV=3                                     | sp Q04446 GLGB_HUMAN (+1)    |
| 724 | Single-stranded DNA-binding protein, mitochondrial OS=Homo sapiens GN=SSBP1 PE=1 SV=1                   | sp Q04837 SSBP_HUMAN         |
| 725 | Reticulocalbin-2 OS=Homo sapiens GN=RCN2 PE=1 SV=1                                                      | sp Q14257 RCN2_HUMAN (+2)    |
| 726 | Isoform 2 of 3-hydroxyisobutyryl-CoA hydrolase, mitochondrial OS=Homo sapiens GN=HIBCH                  | sp Q6NVY1-2 HIBCH_HUMAN (+1) |
| 727 | Eukaryotic translation initiation factor 3 subunit M OS=Homo sapiens GN=EIF3M PE=1 SV=1                 | sp Q7L2H7 EIF3M_HUMAN        |
| 728 | Isoform 2 of Thioredoxin domain-containing protein 5 OS=Homo sapiens GN=TXNDC5                          | sp Q8NBS9-2 TXND5_HUMAN (+2) |
| 729 | m7GpppX diphosphatase OS=Homo sapiens GN=DCPS PE=1 SV=2                                                 | sp Q96C86 DCPS_HUMAN         |
| 730 | Nucleosome assembly protein 1-like 4 OS=Homo sapiens GN=NAP1L4 PE=1 SV=1                                | sp Q99733 NP1L4_HUMAN (+2)   |
| 731 | Isoform 2 of Chitinase domain-containing protein 1 OS=Homo sapiens GN=CHID1                             | sp Q9BWS9-2 CHID1_HUMAN (+3) |
| 732 | Isoform 2 of Haloacid dehalogenase-like hydrolase domain-containing protein 2 OS=Homo sapiens GN=HDHD2  | sp Q9H0R4-2 HDHD2_HUMAN (+2) |
| 733 | Aminopeptidase B OS=Homo sapiens GN=RNPEP PE=1 SV=2                                                     | sp Q9H4A4 AMPB_HUMAN (+1)    |
| 734 | EH domain-containing protein 1 OS=Homo sapiens GN=EHD1 PE=1 SV=2                                        | sp Q9H4M9 EHD1_HUMAN         |
| 735 | Isoform 2 of Adipocyte plasma membrane-associated protein OS=Homo sapiens GN=APMAP                      | sp Q9HDC9-2 APMAP_HUMAN (+1) |
| 736 | Regulation of nuclear pre-mRNA domain-containing protein 1B OS=Homo sapiens GN=RPRD1B PE=1 SV=1         | sp Q9NQG5 RPR1B_HUMAN (+1)   |
| 737 | Isoform 2 of Endoplasmic reticulum aminopeptidase 1 OS=Homo sapiens GN=ERAP1                            | sp Q9NZ08-2 ERAP1_HUMAN (+1) |



|     |                                                                                            |                              |
|-----|--------------------------------------------------------------------------------------------|------------------------------|
| 738 | Protein RCC2 OS=Homo sapiens GN=RCC2 PE=1 SV=2                                             | sp Q9P258 RCC2_HUMAN         |
| 739 | Isoform 2 of Ankyrin repeat and FYVE domain-containing protein 1 OS=Homo sapiens GN=ANKFY1 | sp Q9P2R3-2 ANFY1_HUMAN (+2) |
| 740 | Cathepsin Z OS=Homo sapiens GN=CTSZ PE=1 SV=1                                              | sp Q9UBR2 CATZ_HUMAN         |
| 741 | Nuclear receptor-binding protein OS=Homo sapiens GN=NRBP1 PE=1 SV=1                        | sp Q9UHY1 NRBP_HUMAN (+1)    |
| 742 | Ras-related protein Rab-23 OS=Homo sapiens GN=RAB23 PE=1 SV=1                              | sp Q9ULC3 RAB23_HUMAN        |
| 743 | Eukaryotic translation initiation factor 2 subunit 1 OS=Homo sapiens GN=EIF2S1 PE=1 SV=3   | sp P05198 IF2A_HUMAN         |
| 744 | 40S ribosomal protein S18 OS=Homo sapiens GN=RPS18 PE=1 SV=3                               | sp P62269 RS18_HUMAN         |
| 745 | Transcriptional activator protein Pur-beta OS=Homo sapiens GN=PURB PE=1 SV=3               | sp Q96QR8 PURB_HUMAN         |
| 746 | Isoform 2 of Cysteine--tRNA ligase, cytoplasmic OS=Homo sapiens GN=CARS                    | sp P49589-2 SYCC_HUMAN (+4)  |
| 747 | 60S ribosomal protein L23 OS=Homo sapiens GN=RPL23 PE=1 SV=1                               | sp P62829 RL23_HUMAN         |
| 748 | D-dopachrome decarboxylase OS=Homo sapiens GN=DDT PE=1 SV=3                                | sp P30046 DOPD_HUMAN (+1)    |
| 749 | Phenylalanine--tRNA ligase alpha subunit OS=Homo sapiens GN=FARSA PE=1 SV=3                | sp Q9Y285 SYFA_HUMAN (+4)    |
| 750 | Methionine synthase OS=Homo sapiens GN=MTR PE=1 SV=2                                       | sp Q99707 METH_HUMAN (+1)    |
| 751 | Enhancer of rudimentary homolog OS=Homo sapiens GN=ERH PE=1 SV=1                           | sp P84090 ERH_HUMAN          |
| 752 | Isoform 2 of Podocan OS=Homo sapiens GN=PODN                                               | sp Q7Z5L7-2 PODN_HUMAN (+3)  |
| 753 | Isoform 2 of Mannose-6-phosphate isomerase OS=Homo sapiens GN=MPI                          | sp P34949-2 MPI_HUMAN (+3)   |
| 754 | Isoform 2 of Ribose-phosphate pyrophosphokinase 2 OS=Homo sapiens GN=PRPS2                 | sp P11908-2 PRPS2_HUMAN (+3) |
| 755 | Heat shock protein beta-7 OS=Homo sapiens GN=HSPB7 PE=1 SV=1                               | sp Q9UBY9 HSPB7_HUMAN (+5)   |
| 756 | Inorganic pyrophosphatase OS=Homo sapiens GN=PPA1 PE=2 SV=1                                | tr Q5SQT6 Q5SQT6_HUMAN (+1)  |
| 757 | WD40 repeat-containing protein SMU1 OS=Homo sapiens GN=SMU1 PE=1 SV=2                      | sp Q2TAY7 SMU1_HUMAN         |
| 758 | Isoform 3 of Agrin OS=Homo sapiens GN=AGRN                                                 | sp O00468-3 AGRIN_HUMAN (+6) |
| 759 | Eukaryotic translation initiation factor 3 subunit K OS=Homo sapiens GN=EIF3K PE=1 SV=1    | sp Q9UBQ5 EIF3K_HUMAN (+4)   |
| 760 | Calcium-binding protein 39 OS=Homo sapiens GN=CAB39 PE=1 SV=1                              | sp Q9Y376 CAB39_HUMAN        |
| 761 | Isoform Non-brain of Clathrin light chain A OS=Homo sapiens GN=CLTA                        | sp P09496-2 CLCA_HUMAN (+1)  |
| 762 | S-adenosylmethionine synthase isoform type-2 OS=Homo sapiens GN=MAT2A PE=1 SV=1            | sp P31153 METK2_HUMAN        |
| 763 | Isoform CNPI of 2',3'-cyclic-nucleotide 3'-phosphodiesterase OS=Homo sapiens GN=CNP        | sp P09543-2 CN37_HUMAN (+2)  |
| 764 | Thioredoxin domain-containing protein 17 OS=Homo sapiens GN=TXNDC17 PE=1 SV=1              | sp Q9BRA2 TXD17_HUMAN        |
| 765 | Nascent polypeptide-associated complex subunit alpha OS=Homo sapiens GN=NACA PE=2 SV=1     | tr E9PAV3 E9PAV3_HUMAN       |
