# Supplementary material for: A novel human leiomyoma tissue derived matrix for cell culture studies
Source: Springer Nature journal article supplement (doi:10.1186/s12885-015-1944-z), 2015-12-01
Supplement: MOESM4 [file 9745668]

Table S2. The pH-measurements of Myogel and Matrigel®

|      | Myogel with HSC-3 | Matrigel® with HSC-3 |
|------|-------------------|----------------------|
| 0 h  | 7.0 - 7.5         | 8.0 - 8.5            |
| 17 h | 7.0 - 7.5         | 8.0                  |
| 48 h | 6.5 - 7.0         | 6.0 - 6.5            |
