# Supplementary material for: A novel human leiomyoma tissue derived matrix for cell culture studies
Source: Springer Nature journal article supplement (doi:10.1186/s12885-015-1944-z), 2015-12-01
Supplement: MOESM5 [file 9745668]

Table S3. Microarray results showing genes with FC 1.5 or more when the HSC-3 cells cultured on the top of plastic were compared to the corresponding cells grown on Myogel

| probe set    | gene                                          | Accession | EntrezGene    | Description                      | Plastic (HG-U1) | Plastic (HG-U1) | Myogel (HG-U1) | Myogel (HG-U1) | fold change | lower bound o | upper bound o | difference of mean | filtered |
|--------------|-----------------------------------------------|-----------|---------------|----------------------------------|-----------------|-----------------|----------------|----------------|-------------|---------------|---------------|--------------------|----------|
| 240496_at    | Centaurin, gamma 3                            | AI652000  | 116988        | gb:AI652000 /DB_XREF=gi:4735!    | 29,35           | 25,26           | 2828,81        | 0,26           | 96,37       | 39,9          | 100000000     | 2799,45            | *        |
| 209189_at    | v-fos FBJ murine osteosarcoma viral oncogene  | BC004490  | 2353          | gb:BC004490.1 /DB_XREF=gi:13:    | 144,91          | 17,19           | 676,2          | 3,68           | 4,67        | 3,9           | 5,8           | 531,28             | *        |
| 1565867_a_at | KIAA0663 gene product                         | W01876    | 9877          | gb:W01876 /DB_XREF=gi:12740:     | 122,77          | 7,94            | 438,99         | 2,22           | 3,58        | 3,23          | 4             | 316,21             | *        |
| 201693_s_at  | early growth response 1                       | AV733950  | 1958          | gb:AV733950 /DB_XREF=gi:1085     | 537,23          | 24,63           | 1859,92        | 7,11           | 3,46        | 3,22          | 3,75          | 1322,69            | *        |
| 1554860_at   | protein tyrosine phosphatase, non-receptor    | AF394064  | 5778          | gb:AF394064.1 /DB_XREF=gi:216    | 73,52           | 4,5             | 249,35         | 1,33           | 3,39        | 3,08          | 3,77          | 175,83             | *        |
| 201461_s_at  | mitogen-activated protein kinase-activated    | NM_004759 | 9261          | gb:NM_004759.1 /DB_XREF=gi:1     | 73,39           | 9,53            | 240,04         | 2,91           | 3,27        | 2,69          | 4,16          | 166,65             | *        |
| 227404_s_at  | Early growth response 1                       | AI459194  | 1958          | gb:AI459194 /DB_XREF=gi:4311:    | 470,96          | 69,33           | 1527,07        | 21,38          | 3,24        | 2,61          | 4,28          | 1056,11            | *        |
| 244396_at    | Ras-GTPase-activating protein SH3-domain-     | BE673925  | 10146         | gb:BE673925 /DB_XREF=gi:1003     | 347,42          | 8,95            | 1113,1         | 2,79           | 3,2         | 3,07          | 3,35          | 765,67             | *        |
| 201694_s_at  | early growth response 1                       | NM_001964 | 1958          | gb:NM_001964.1 /DB_XREF=gi:4     | 1700,72         | 79,97           | 5317,7         | 25,58          | 3,13        | 2,9           | 3,39          | 3616,99            | *        |
| 1559561_at   | F-box protein, helicase, 18                   | AL832251  | 84893         | gb:AL832251.1 /DB_XREF=gi:217    | 76,32           | 0,4             | 237,56         | 0,13           | 3,11        | 3,09          | 3,14          | 161,24             | *        |
| 1559517_a_at | spire homolog 1 (Drosophila)                  | AL833817  | 56907         | gb:AL833817.1 /DB_XREF=gi:217    | 133,35          | 10,97           | 395,88         | 3,69           | 2,97        | 2,61          | 3,44          | 262,53             | *        |
| 238687_x_at  | hypothetical protein FLJ20582                 | AV753065  | 54989         | gb:AV753065 /DB_XREF=gi:1091     | 112,1           | 13,7            | 329,84         | 4,65           | 2,94        | 2,45          | 3,69          | 217,74             | *        |
| 224580_at    | Solute carrier family 38, member 1            | BF515894  | 81539         | gb:BF515894 /DB_XREF=gi:1160     | 371,01          | 15,91           | 970,18         | 6,08           | 2,62        | 2,44          | 2,82          | 599,18             | *        |
| 1558960_a_at | Milk fat globule-EGF factor 8 protein         | BG740880  | 4240          | gb:BG740880 /DB_XREF=gi:1405     | 117,71          | 0,75            | 302,79         | 0,29           | 2,57        | 2,55          | 2,6           | 185,07             | *        |
| 1561813_at   | MRNA full length insert cDNA clone EUROIM     | AL109711  |               | gb:AL109711.1 /DB_XREF=gi:568    | 122,44          | 2,64            | 315,15         | 1,02           | 2,57        | 2,48          | 2,67          | 192,71             | *        |
| 1566340_at   | RNA, U6C small nucleolar                      | BG944179  | 319103        | gb:BG944179 /DB_XREF=gi:1434     | 85,37           | 7,17            | 213,9          | 2,86           | 2,51        | 2,2           | 2,91          | 128,53             | *        |
| 235476_at    | tripartite motif-containing 59                | AW182459  | 286827        | gb:AW182459 /DB_XREF=gi:645      | 273,4           | 10,28           | 677,7          | 4,15           | 2,48        | 2,33          | 2,64          | 404,31             | *        |
| 217502_at    | interferon-induced protein with tetratricop   | BE888744  | 3433          | gb:BE888744 /DB_XREF=gi:1034     | 123,55          | 9,64            | 305,59         | 3,9            | 2,47        | 2,19          | 2,84          | 182,04             | *        |
| 222880_at    | v-akt murine thymoma viral oncogene hom       | AF135794  | 10000         | gb:AF135794.1 /DB_XREF=gi:457    | 304,81          | 18,31           | 737,63         | 7,57           | 2,42        | 2,2           | 2,69          | 432,82             | *        |
| 238831_at    | Transmembrane protein 33                      | BF114679  | 55161         | gb:BF114679 /DB_XREF=gi:1098     | 112,09          | 10,52           | 268,11         | 4,4            | 2,39        | 2,07          | 2,83          | 156,02             | *        |
| 227062_at    | trophoblast-derived noncoding RNA             | AU155361  | 283131        | gb:AU155361 /DB_XREF=gi:1101     | 162,23          | 5,83            | 388,37         | 2,43           | 2,39        | 2,26          | 2,55          | 226,14             | *        |
| 213286_at    | zinc finger RNA binding protein               | BF445199  | 51663         | gb:BF445199 /DB_XREF=gi:1151     | 494,42          | 27,74           | 1174,28        | 11,68          | 2,38        | 2,17          | 2,62          | 679,86             | *        |
| 241701_at    | Rho GTPase activating protein 21              | BF369489  | 57584         | gb:BF369489 /DB_XREF=gi:1133     | 192,52          | 13,8            | 454,38         | 5,85           | 2,36        | 2,11          | 2,68          | 261,86             | *        |
| 216555_at    | gb:AK026712.1 /DB_XREF=gi:10439629 /FE/       | AK026712  |               | gb:AK026712.1 /DB_XREF=gi:104    | 110,37          | 16,94           | 260,57         | 7,17           | 2,36        | 1,88          | 3,17          | 150,2              | *        |
| 208151_x_at  | DEAD (Asp-Glu-Ala-Asp) box polypeptide 17     | NM_030881 | 10521         | gb:NM_030881.1 /DB_XREF=gi:1     | 482,28          | 16,6            | 1132,38        | 7,07           | 2,35        | 2,22          | 2,49          | 650,11             | *        |
| 242160_at    | Syntaxin 17                                   | AI733506  | 55014         | gb:AI733506 /DB_XREF=gi:5054     | 100,41          | 8,33            | 234,97         | 3,56           | 2,34        | 2,05          | 2,72          | 134,56             | *        |
| 1560017_at   | SMILE protein                                 | AK074973  | 160418        | gb:AK074973.1 /DB_XREF=gi:227    | 245             | 15,42           | 565,8          | 6,68           | 2,31        | 2,09          | 2,58          | 320,8              | *        |
| 1570347_at   | MAX-like protein X                            | BC014537  | 6945          | gb:BC014537.1 /DB_XREF=gi:157    | 146,94          | 7,15            | 334,77         | 3,14           | 2,28        | 2,11          | 2,48          | 187,83             | *        |
| 224771_at    | neuron navigator 1                            | AI937060  | 89796         | gb:AI937060 /DB_XREF=gi:56759    | 90,87           | 4,67            | 206,45         | 2,06           | 2,27        | 2,09          | 2,49          | 115,58             | *        |
| 33148_at     | zinc finger RNA binding protein               | AI459274  | 51663         | Cluster Incl. AI459274:tk11f11.x | 438,92          | 9,57            | 991,88         | 4,24           | 2,26        | 2,18          | 2,35          | 552,96             | *        |
| 224321_at    | transmembrane protein with EGF-like and tr    | AB004064  | 23671         | gb:AB004064.1 /DB_XREF=gi:691    | 352,23          | 13,33           | 787,48         | 5,96           | 2,24        | 2,1           | 2,39          | 435,25             | *        |
| 210210_at    | myelin protein zero-like 1                    | AF181660  | 9019          | gb:AF181660.1 /DB_XREF=gi:600    | 171,79          | 9,87            | 383,61         | 4,42           | 2,23        | 2,04          | 2,47          | 211,82             | *        |
| 217448_s_at  | chromosome 14 open reading frame 92 ///       | AL117508  | 85412 /// 987 | gb:AL117508.1 /DB_XREF=gi:591    | 265,48          | 23,3            | 590,26         | 10,48          | 2,22        | 1,94          | 2,61          | 324,78             | *        |
| 238506_at    | hypothetical protein LOC116064                | BG285274  | 116064        | gb:BG285274 /DB_XREF=gi:1303     | 278,2           | 16,82           | 606,1          | 7,72           | 2,18        | 1,98          | 2,42          | 327,9              | *        |
| 1561093_at   | putative UST1-like organic anion transporte   | AK091990  | 387601        | gb:AK091990.1 /DB_XREF=gi:217    | 175,28          | 25,68           | 382,79         | 11,76          | 2,18        | 1,75          | 2,89          | 207,52             | *        |
| 242408_at    | serine/threonine/tyrosine interacting protei  | AW968935  | 6815          | gb:AW968935 /DB_XREF=gi:815      | 558,22          | 14,33           | 1209,63        | 6,61           | 2,17        | 2,08          | 2,26          | 651,41             | *        |
| 235588_at    | establishment of cohesion 1 homolog 2 (S. c   | AA740849  | 157570        | gb:AA740849 /DB_XREF=gi:2779     | 245,94          | 21,7            | 525,28         | 10,16          | 2,14        | 1,86          | 2,51          | 279,34             | *        |
| 227454_at    | TAO kinase 1                                  | AB037782  | 57551         | gb:AB037782.1 /DB_XREF=gi:727    | 512,14          | 15,22           | 1093,06        | 7,13           | 2,13        | 2,03          | 2,25          | 580,91             | *        |
| 211051_s_at  | exostoses (multiple)-like 3 /// exostoses (mi | BC006363  | 2137          | gb:BC006363.1 /DB_XREF=gi:130    | 134,28          | 12,53           | 285,25         | 5,9            | 2,12        | 1,83          | 2,52          | 150,97             | *        |
| 209013_x_at  | triple functional domain (PTPRF interacting)  | AF091395  | 7204          | gb:AF091395.1 /DB_XREF=gi:364    | 228,91          | 16,97           | 484,65         | 8,01           | 2,12        | 1,88          | 2,42          | 255,74             | *        |
| 1555546_a_at | protein O-fucosyltransferase 2                | AY066015  | 23275         | gb:AY066015.1 /DB_XREF=gi:180    | 113,82          | 6,05            | 241,7          | 2,85           | 2,12        | 1,95          | 2,33          | 127,88             | *        |
| 201473_at    | jun B proto-oncogene                          | NM_002229 | 3726          | gb:NM_002229.1 /DB_XREF=gi:4     | 201,48          | 30,58           | 424,41         | 14,52          | 2,11        | 1,67          | 2,82          | 222,93             | *        |
| 201728_s_at  | KIAA0100 gene product                         | AA904674  | 9703          | gb:AA904674 /DB_XREF=gi:3039     | 271,43          | 16,89           | 573,39         | 8              | 2,11        | 1,91          | 2,36          | 301,96             | *        |
| 231735_s_at  | PRO1073 protein                               | NM_014086 | 29005         | gb:NM_014086.1 /DB_XREF=gi:7     | 1548,62         | 23,67           | 3252,22        | 11,27          | 2,1         | 2,05          | 2,16          | 1703,6             | *        |
| 212107_s_at  | DEAH (Asp-Glu-Ala-His) box polypeptide 9      | BE561014  | 1660          | gb:BE561014 /DB_XREF=gi:9804     | 436,93          | 21,75           | 913,04         | 10,41          | 2,09        | 1,93          | 2,28          | 476,11             | *        |
| 212831_at    | EGF-like-domain, multiple 5                   | BF110421  | 1955          | gb:BF110421 /DB_XREF=gi:1094     | 94,29           | 3,37            | 196,68         | 1,61           | 2,09        | 1,97          | 2,22          | 102,39             | *        |
| 235645_at    | establishment of cohesion 1 homolog 1 (S. c   | AW501507  | 114799        | gb:AW501507 /DB_XREF=gi:711      | 178,09          | 7,84            | 371,54         | 3,76           | 2,09        | 1,94          | 2,25          | 193,45             | *        |

|              |                                               |           |                 |                                  |         |       |         |       |      |      |      |         |   |
|--------------|-----------------------------------------------|-----------|-----------------|----------------------------------|---------|-------|---------|-------|------|------|------|---------|---|
| 200951_s_at  | cyclin D2                                     | AW026491  | 894             | gb:AW026491 /DB_XREF=gi:588      | 995,24  | 37,86 | 2074,14 | 18,17 | 2,08 | 1,96 | 2,23 | 1078,91 | * |
| 204909_at    | DEAD (Asp-Glu-Ala-Asp) box polypeptide 6      | NM_004397 | 1656            | gb:NM_004397.2 /DB_XREF=gi:1     | 278,29  | 7,24  | 580,03  | 3,48  | 2,08 | 2    | 2,18 | 301,74  | * |
| 234347_s_at  | density-regulated protein                     | AF038554  | 8562            | gb:AF038554.1 /DB_XREF=gi:28     | 243,5   | 14,01 | 507,07  | 6,73  | 2,08 | 1,9  | 2,31 | 263,57  | * |
| 213956_at    | centrosome-associated protein 350             | AW299294  | 9857            | gb:AW299294 /DB_XREF=gi:670      | 180,57  | 13,45 | 375,42  | 6,47  | 2,08 | 1,85 | 2,38 | 194,85  | * |
| 200727_s_at  | ARP2 actin-related protein 2 homolog (yeas    | AA699583  | 10097           | gb:AA699583 /DB_XREF=gi:270      | 1718,78 | 63,96 | 3532,32 | 31,12 | 2,06 | 1,93 | 2,19 | 1813,54 | * |
| 48659_at     | hypothetical protein FLJ12438                 | W60802    | 60672           | Cluster Incl. W60802:zd27e02.s1  | 495,03  | 16    | 1014,6  | 7,81  | 2,05 | 1,94 | 2,17 | 519,57  | * |
| 235852_at    | Stonin 2                                      | BE379761  | 85439           | gb:BE379761 /DB_XREF=gi:9325     | 388,17  | 12,45 | 796,05  | 6,07  | 2,05 | 1,95 | 2,17 | 407,88  | * |
| 1555153_s_at | FCH domain only 2                             | BC014311  | 115548          | gb:BC014311.1 /DB_XREF=gi:15     | 107,15  | 6,8   | 219,63  | 3,32  | 2,05 | 1,85 | 2,29 | 112,48  | * |
| 208178_x_at  | triple functional domain (PTPRF interacting)  | NM_007118 | 7204            | gb:NM_007118.1 /DB_XREF=gi:6     | 270,61  | 18,65 | 551,35  | 9,15  | 2,04 | 1,82 | 2,3  | 280,74  | * |
| 1555384_a_at | c-Mpl binding protein                         | BC022377  | 113251          | gb:BC022377.1 /DB_XREF=gi:18     | 156,51  | 8,48  | 319,5   | 4,16  | 2,04 | 1,87 | 2,25 | 162,99  | * |
| 221220_s_at  | SCY1-like 2 (S. cerevisiae)                   | NM_017988 | 55681           | gb:NM_017988.1 /DB_XREF=gi:8     | 168,91  | 13,68 | 342,63  | 6,74  | 2,03 | 1,78 | 2,35 | 173,72  | * |
| 1553304_at   | family with sequence similarity 61, member    | NM_144703 | 149986          | gb:NM_144703.1 /DB_XREF=gi:2     | 216,31  | 13,4  | 435,53  | 6,66  | 2,01 | 1,82 | 2,25 | 219,22  | * |
| 236207_at    | sperm specific antigen 2                      | BE083088  | 6744            | gb:BE083088 /DB_XREF=gi:8473     | 130,11  | 7,04  | 257,12  | 3,56  | 1,98 | 1,81 | 2,17 | 127,01  | * |
| 214052_x_at  | BAT2 domain containing 1                      | AW301305  | 23215           | gb:AW301305 /DB_XREF=gi:671      | 175,05  | 7,52  | 346,08  | 3,8   | 1,98 | 1,84 | 2,13 | 171,03  | * |
| 232198_at    | CDNA FLJ12676 fis, clone NT2RM4002383         | BF509125  |                 | gb:BF509125 /DB_XREF=gi:1159     | 192,91  | 12,64 | 382,03  | 6,38  | 1,98 | 1,78 | 2,23 | 189,13  | * |
| 200917_s_at  | signal recognition particle receptor ('dockin | BG474541  | 6734            | gb:BG474541 /DB_XREF=gi:134      | 119,42  | 6,5   | 235,51  | 3,29  | 1,97 | 1,8  | 2,17 | 116,09  | * |
| 223888_s_at  | leucyl-tRNA synthetase                        | AF151026  | 51520           | gb:AF151026.1 /DB_XREF=gi:71     | 501,62  | 14,81 | 988,61  | 7,51  | 1,97 | 1,88 | 2,07 | 486,99  | * |
| 241683_at    | HECT domain containing 1                      | AW207734  | 25831           | gb:AW207734 /DB_XREF=gi:650      | 109,47  | 6,08  | 215,03  | 3,09  | 1,96 | 1,79 | 2,17 | 105,56  | * |
| 213688_at    | calmodulin 1 (phosphorylase kinase, delta)    | N25325    | 801             | gb:N25325 /DB_XREF=gi:113947     | 454,37  | 11,48 | 883,27  | 5,91  | 1,94 | 1,86 | 2,03 | 428,9   | * |
| 205809_s_at  | Wiskott-Aldrich syndrome-like                 | BE504979  | 8976            | gb:BE504979 /DB_XREF=gi:9707     | 778,76  | 26,87 | 1507,7  | 13,88 | 1,94 | 1,83 | 2,06 | 728,95  | * |
| 214007_s_at  | PTK9 protein tyrosine kinase 9                | AW665024  | 5756            | gb:AW665024 /DB_XREF=gi:745      | 325,42  | 19,76 | 628,1   | 10,24 | 1,93 | 1,75 | 2,15 | 302,68  | * |
| 201208_s_at  | tumor necrosis factor, alpha-induced protei   | BC001643  | 7126            | gb:BC001643.1 /DB_XREF=gi:12     | 122,62  | 15,49 | 236,18  | 8,04  | 1,93 | 1,58 | 2,45 | 113,56  | * |
| 208664_s_at  | tetratricopeptide repeat domain 3             | AU131711  | 7267            | gb:AU131711 /DB_XREF=gi:109      | 289,27  | 6,4   | 558,85  | 3,31  | 1,93 | 1,86 | 2,01 | 269,58  | * |
| 202081_at    | immediate early response 2                    | NM_004907 | 9592            | gb:NM_004907.1 /DB_XREF=gi:4     | 1053,57 | 12,89 | 2033,52 | 6,68  | 1,93 | 1,89 | 1,97 | 979,96  | * |
| 236957_at    | cell division cycle associated 2              | AI248208  | 157313          | gb:AI248208 /DB_XREF=gi:3843     | 592,12  | 30,09 | 1140,7  | 15,62 | 1,93 | 1,77 | 2,11 | 548,58  | * |
| 40284_at     | forkhead box A2                               | AB028021  | 3170            | Cluster Incl. AB028021:Homo sa   | 115,53  | 3,03  | 222,27  | 1,57  | 1,92 | 1,84 | 2,01 | 106,74  | * |
| 220946_s_at  | huntingtin interacting protein B              | NM_014159 | 29072           | gb:NM_014159.1 /DB_XREF=gi:7     | 204,73  | 14,4  | 393,12  | 7,5   | 1,92 | 1,71 | 2,18 | 188,4   | * |
| 89948_at     | Cluster Incl. AI743331:wg91f07.x1 Homo sa     | AI743331  |                 | Cluster Incl. AI743331:wg91f07.) | 218,05  | 12,61 | 419,07  | 6,56  | 1,92 | 1,75 | 2,13 | 201,02  | * |
| 214316_x_at  | Calreticulin                                  | AI378706  | 811             | gb:AI378706 /DB_XREF=gi:4188     | 115,96  | 10,25 | 222     | 5,35  | 1,91 | 1,66 | 2,25 | 106,04  | * |
| 209344_at    | tropomyosin 4                                 | BC002827  | 7171            | gb:BC002827.1 /DB_XREF=gi:12     | 662,85  | 16,04 | 1268,42 | 8,38  | 1,91 | 1,84 | 2    | 605,57  | * |
| 212439_at    | inositol hexaphosphate kinase 1               | BE614199  | 9807            | gb:BE614199 /DB_XREF=gi:9895     | 165,04  | 18,52 | 312,84  | 9,77  | 1,9  | 1,59 | 2,34 | 147,8   | * |
| 224189_x_at  | ets homologous factor                         | AF124438  | 26298           | gb:AF124438.1 /DB_XREF=gi:48     | 336,33  | 15,29 | 637,75  | 8,06  | 1,9  | 1,76 | 2,05 | 301,42  | * |
| 242665_at    | formin-like 2                                 | AL042120  | 114793          | gb:AL042120 /DB_XREF=gi:5421     | 265,33  | 13,48 | 503,42  | 7,11  | 1,9  | 1,74 | 2,08 | 238,09  | * |
| 208893_s_at  | dual specificity phosphatase 6                | BC005047  | 1848            | gb:BC005047.1 /DB_XREF=gi:13     | 680,19  | 36,29 | 1283,35 | 19,23 | 1,89 | 1,73 | 2,07 | 603,16  | * |
| 227248_at    | hypothetical protein FLJ21019                 | AL563218  | 79990           | gb:AL563218 /DB_XREF=gi:1291     | 117,46  | 8,53  | 221,44  | 4,53  | 1,89 | 1,68 | 2,15 | 103,98  | * |
| 204538_x_at  | nuclear pore complex interacting protein //,  | NM_006985 | 7 /// 440341 // | gb:NM_006985.1 /DB_XREF=gi:5     | 350,97  | 14,37 | 664,58  | 7,59  | 1,89 | 1,77 | 2,04 | 313,61  | * |
| 214474_at    | protein kinase, AMP-activated, beta 2 non-c   | NM_005399 | 5565            | gb:NM_005399.1 /DB_XREF=gi:4     | 315,87  | 9,65  | 590,13  | 5,17  | 1,87 | 1,78 | 1,97 | 274,26  | * |
| 204535_s_at  | RE1-silencing transcription factor            | AI978576  | 5978            | gb:AI978576 /DB_XREF=gi:5803     | 116,13  | 2,16  | 217,39  | 1,15  | 1,87 | 1,81 | 1,93 | 101,26  | * |
| 202323_s_at  | acyl-Coenzyme A binding domain containin      | AI636775  | 64746           | gb:AI636775 /DB_XREF=gi:4688     | 629,86  | 31,7  | 1175,34 | 16,99 | 1,87 | 1,72 | 2,04 | 545,48  | * |
| 1565765_x_at | Hypothetical protein FLJ14834                 | AL832478  | 84935           | gb:AL832478.1 /DB_XREF=gi:21     | 567,98  | 6,52  | 1059,66 | 3,5   | 1,87 | 1,83 | 1,9  | 491,68  | * |
| 204827_s_at  | cyclin F                                      | U17105    | 899             | gb:U17105.1 /DB_XREF=gi:5767     | 163,7   | 14,82 | 303,67  | 7,99  | 1,86 | 1,6  | 2,19 | 139,97  | * |
| 1556651_at   | Wolf-Hirschhorn syndrome candidate 2          | CA430403  | 7469            | gb:CA430403 /DB_XREF=gi:2479     | 188,71  | 3,72  | 350,64  | 2     | 1,86 | 1,8  | 1,92 | 161,93  | * |
| 243801_x_at  | Mitochondrial ribosomal protein L30           | AA971709  | 51263           | gb:AA971709 /DB_XREF=gi:314      | 437,8   | 15,42 | 811,31  | 8,32  | 1,85 | 1,75 | 1,97 | 373,51  | * |
| 221753_at    | slingshot homolog 1 (Drosophila)              | AI651213  | 54434           | gb:AI651213 /DB_XREF=gi:4735     | 228,87  | 9,82  | 423,06  | 5,31  | 1,85 | 1,72 | 1,99 | 194,19  | * |
| 226543_at    | muted homolog (mouse)                         | AI768114  | 63915           | gb:AI768114 /DB_XREF=gi:5234     | 421,14  | 31,73 | 777,79  | 17,18 | 1,85 | 1,63 | 2,12 | 356,66  | * |
| 243648_at    | gb:AA280627 /DB_XREF=gi:1924737 /DB_XI        | AA280627  |                 | gb:AA280627 /DB_XREF=gi:1924     | 640,5   | 23,21 | 1187,44 | 12,52 | 1,85 | 1,75 | 1,98 | 546,94  | * |
| 236940_at    | Transcribed locus, weakly similar to XP_539   | W60647    |                 | gb:W60647 /DB_XREF=gi:13676      | 192,53  | 6,38  | 355,75  | 3,46  | 1,85 | 1,75 | 1,96 | 163,22  | * |
| 233827_s_at  | suppressor of Ty 16 homolog (S. cerevisiae)   | AK024072  | 11198           | gb:AK024072.1 /DB_XREF=gi:10     | 1269,59 | 44,95 | 2339,72 | 24,39 | 1,84 | 1,74 | 1,96 | 1070,13 | * |
| 235507_at    | similar to hypothetical protein FLJ10883      | AA461195  | 115294          | gb:AA461195 /DB_XREF=gi:218      | 394,92  | 26,84 | 726,91  | 14,58 | 1,84 | 1,65 | 2,08 | 331,98  | * |
| 213816_s_at  | met proto-oncogene (hepatocyte growth fa      | AA005141  | 4233            | gb:AA005141 /DB_XREF=gi:144      | 299,65  | 13,76 | 547,4   | 7,53  | 1,83 | 1,69 | 1,98 | 247,75  | * |

|              |                                              |           |                 |                              |         |       |         |       |      |      |      |         |   |
|--------------|----------------------------------------------|-----------|-----------------|------------------------------|---------|-------|---------|-------|------|------|------|---------|---|
| 219679_s_at  | WW domain containing adaptor with coiled     | NM_018604 | 51322           | gb:NM_018604.1 /DB_XREF=gi:8 | 507,65  | 15,02 | 930,93  | 8,19  | 1,83 | 1,74 | 1,93 | 423,28  | * |
| 1316_at      | thyroid hormone receptor, alpha (erythrobl   | X55005    | 7067            | X55005 /FEATURE=mRNA /DEFI   | 238,7   | 15,78 | 435,26  | 8,65  | 1,82 | 1,64 | 2,05 | 196,56  | * |
| 233819_s_at  | zinc finger protein 294                      | AK023499  | 26046           | gb:AK023499.1 /DB_XREF=gi:10 | 404,36  | 16,97 | 734,69  | 9,34  | 1,82 | 1,69 | 1,96 | 330,33  | * |
| 1566887_x_at | LOC441699                                    | AY094612  | 441699          | gb:AY094612.1 /DB_XREF=gi:21 | 175,59  | 1,01  | 318,86  | 0,55  | 1,82 | 1,8  | 1,83 | 143,27  | * |
| 213813_x_at  | gb:AI345238 /DB_XREF=gi:4082444 /DB_XR       | AI345238  |                 | gb:AI345238 /DB_XREF=gi:4082 | 398,03  | 21,09 | 724,43  | 11,59 | 1,82 | 1,67 | 2    | 326,41  | * |
| 221765_at    | gb:AI378044 /DB_XREF=gi:4187897 /DB_XR       | AI378044  |                 | gb:AI378044 /DB_XREF=gi:4187 | 1274,84 | 39,6  | 2322,49 | 21,74 | 1,82 | 1,73 | 1,92 | 1047,65 | * |
| 202476_s_at  | tubulin, gamma complex associated protein    | BF002130  | 10844           | gb:BF002130 /DB_XREF=gi:1070 | 137,27  | 8,52  | 247,92  | 4,72  | 1,81 | 1,63 | 2,02 | 110,65  | * |
| 242352_at    | Nipped-B homolog (Drosophila)                | AW272262  | 25836           | gb:AW272262 /DB_XREF=gi:665  | 1006,58 | 30,5  | 1823,07 | 16,84 | 1,81 | 1,72 | 1,91 | 816,49  | * |
| 211159_s_at  | protein phosphatase 2, regulatory subunit B  | AB000635  | 5528            | gb:AB000635.1 /DB_XREF=gi:21 | 253,94  | 6,66  | 457,44  | 3,7   | 1,8  | 1,72 | 1,89 | 203,5   | * |
| 220800_s_at  | tropomodulin 3 (ubiquitous)                  | NM_014547 | 29766           | gb:NM_014547.1 /DB_XREF=gi:7 | 274,27  | 15,44 | 493,75  | 8,58  | 1,8  | 1,64 | 1,99 | 219,48  | * |
| 218273_s_at  | protein phosphatase 2C, magnesium-depen      | NM_018444 | 54704           | gb:NM_018444.1 /DB_XREF=gi:8 | 434,42  | 10,53 | 776,44  | 5,89  | 1,79 | 1,72 | 1,86 | 342,01  | * |
| 238419_at    | pleckstrin homology-like domain, family B, r | T68150    | 90102           | gb:T68150 /DB_XREF=gi:679298 | 319,48  | 18,76 | 572,84  | 10,46 | 1,79 | 1,63 | 1,99 | 253,36  | * |
| 1570126_at   | Homo sapiens, clone IMAGE:5015646, mRN       | BC033216  |                 | gb:BC033216.1 /DB_XREF=gi:23 | 206,79  | 4,55  | 370,98  | 2,54  | 1,79 | 1,73 | 1,86 | 164,19  | * |
| 211949_s_at  | nucleolar and coiled-body phosphoprotein 1   | AI355279  | 9221            | gb:AI355279 /DB_XREF=gi:4095 | 578,41  | 20,56 | 1027,18 | 11,58 | 1,78 | 1,67 | 1,89 | 448,76  | * |
| 219930_at    | Kruppel-like factor 8                        | NM_007250 | 11279           | gb:NM_007250.1 /DB_XREF=gi:6 | 209,81  | 5,09  | 374,33  | 2,85  | 1,78 | 1,71 | 1,86 | 164,52  | * |
| 213971_s_at  | suppressor of zeste 12 homolog (Drosophila   | AI924660  | 23512           | gb:AI924660 /DB_XREF=gi:5660 | 458,84  | 17,47 | 814,5   | 9,84  | 1,78 | 1,67 | 1,9  | 355,66  | * |
| 224227_s_at  | B double prime 1, subunit of RNA polymera    | AF298152  | 55814           | gb:AF298152.1 /DB_XREF=gi:11 | 219,13  | 8,75  | 389,9   | 4,92  | 1,78 | 1,66 | 1,91 | 170,77  | * |
| 223195_s_at  | sestrin 2                                    | BF131886  | 83667           | gb:BF131886 /DB_XREF=gi:1097 | 243,22  | 11,08 | 433,84  | 6,21  | 1,78 | 1,65 | 1,93 | 190,63  | * |
| 1567224_at   | Lipoma cell line Li-538/SV40 ectopic sequen  | U29113    |                 | gb:U29113.1 /DB_XREF=gi:9400 | 252,03  | 19,6  | 447,95  | 11,03 | 1,78 | 1,56 | 2,05 | 195,92  | * |
| 218906_x_at  | likely ortholog of kinesin light chain 2     | NM_022822 | 64837           | gb:NM_022822.1 /DB_XREF=gi:1 | 912,64  | 35,54 | 1615,49 | 20,08 | 1,77 | 1,66 | 1,9  | 702,86  | * |
| 226531_at    | hypothetical protein FLJ14466                | AL530596  | 84876           | gb:AL530596 /DB_XREF=gi:1279 | 346,66  | 20,79 | 615,23  | 11,71 | 1,77 | 1,61 | 1,98 | 268,57  | * |
| 206383_s_at  | Ras-GTPase activating protein SH3 domain-l   | NM_012297 | 9908            | gb:NM_012297.1 /DB_XREF=gi:7 | 367,27  | 13,33 | 647,33  | 7,56  | 1,76 | 1,66 | 1,88 | 280,07  | * |
| 210057_at    | PI-3-kinase-related kinase SMG-1             | U32581    | 23049           | gb:U32581.2 /DB_XREF=gi:5542 | 239,35  | 5,69  | 420,6   | 3,24  | 1,76 | 1,69 | 1,83 | 181,26  | * |
| 212650_at    | EH domain binding protein 1                  | BF116032  | 23301           | gb:BF116032 /DB_XREF=gi:1098 | 493,72  | 22,58 | 870,25  | 12,81 | 1,76 | 1,63 | 1,91 | 376,54  | * |
| 216074_x_at  | KIBRA protein                                | AK001727  | 23286           | gb:AK001727.1 /DB_XREF=gi:70 | 202,72  | 15,23 | 353,93  | 8,72  | 1,75 | 1,54 | 2    | 151,21  | * |
| 1560020_at   | DnaJ (Hsp40) homolog, subfamily C, membe     | BC043583  | 23317           | gb:BC043583.1 /DB_XREF=gi:27 | 147,07  | 10,32 | 257,47  | 5,89  | 1,75 | 1,56 | 1,99 | 110,4   | * |
| 223546_x_at  | LUC7-like (S. cerevisiae)                    | AY005111  | 55692           | gb:AY005111.1 /DB_XREF=gi:10 | 141,64  | 13,03 | 248,15  | 7,44  | 1,75 | 1,51 | 2,08 | 106,5   | * |
| 205717_x_at  | protocadherin gamma subfamily C, 3 /// prc   | NM_002588 | 56105 /// 5610  | gb:NM_002588.1 /DB_XREF=gi:4 | 269,78  | 13,66 | 470,97  | 7,83  | 1,75 | 1,6  | 1,91 | 201,19  | * |
| 1559436_x_at | Arrestin, beta 2                             | AL832061  | 409             | gb:AL832061.1 /DB_XREF=gi:21 | 553,94  | 9,95  | 963,02  | 5,73  | 1,74 | 1,69 | 1,79 | 409,08  | * |
| 237252_at    | thrombomodulin                               | AW119113  | 7056            | gb:AW119113 /DB_XREF=gi:608  | 293,48  | 7,72  | 509,8   | 4,44  | 1,74 | 1,66 | 1,82 | 216,32  | * |
| 203950_s_at  | chloride channel 6                           | NM_001286 | 1185            | gb:NM_001286.1 /DB_XREF=gi:4 | 150,82  | 11,53 | 260,24  | 6,68  | 1,73 | 1,52 | 1,99 | 109,43  | * |
| 208892_s_at  | dual specificity phosphatase 6               | BC003143  | 1848            | gb:BC003143.1 /DB_XREF=gi:13 | 1024,56 | 23,17 | 1774,91 | 13,38 | 1,73 | 1,67 | 1,8  | 750,35  | * |
| 219850_s_at  | ets homologous factor                        | NM_012153 | 26298           | gb:NM_012153.1 /DB_XREF=gi:6 | 427,2   | 19,81 | 740,81  | 11,42 | 1,73 | 1,6  | 1,88 | 313,61  | * |
| 218969_at    | mitochondria-associated protein involved in  | NM_016069 | 51025           | gb:NM_016069.1 /DB_XREF=gi:7 | 435,17  | 24,62 | 754,56  | 14,2  | 1,73 | 1,58 | 1,92 | 319,39  | * |
| 219560_at    | hypothetical protein FLJ21125                | NM_024627 | 79680           | gb:NM_024627.1 /DB_XREF=gi:1 | 155,95  | 18,7  | 269,9   | 10,81 | 1,73 | 1,43 | 2,17 | 113,95  | * |
| 224917_at    | gb:BF674052 /DB_XREF=gi:11947947 /DB_x       | BF674052  |                 | gb:BF674052 /DB_XREF=gi:1194 | 680,28  | 29,92 | 1179,19 | 17,26 | 1,73 | 1,61 | 1,88 | 498,91  | * |
| 201635_s_at  | fragile X mental retardation, autosomal hon  | AI990766  | 8087            | gb:AI990766 /DB_XREF=gi:5837 | 2319,37 | 70,88 | 3981,39 | 41,29 | 1,72 | 1,63 | 1,81 | 1662,02 | * |
| 1553106_at   | hypothetical protein FLJ37562                | NM_152409 | 134553          | gb:NM_152409.1 /DB_XREF=gi:2 | 672,56  | 32,25 | 1158,05 | 18,73 | 1,72 | 1,59 | 1,88 | 485,49  | * |
| 212952_at    | Calreticulin                                 | AA910371  | 811             | gb:AA910371 /DB_XREF=gi:304  | 484,62  | 28,6  | 829,42  | 16,71 | 1,71 | 1,55 | 1,9  | 344,8   | * |
| 202062_s_at  | sel-1 suppressor of lin-12-like (C. elegans) | NM_005065 | 6400            | gb:NM_005065.1 /DB_XREF=gi:4 | 321,08  | 11,31 | 548,84  | 6,62  | 1,71 | 1,61 | 1,82 | 227,76  | * |
| 226637_at    | Ubiquitin-conjugating enzyme E2H (UBC8 ho    | AA916831  | 7328            | gb:AA916831 /DB_XREF=gi:305  | 144,92  | 10,05 | 247,6   | 5,88  | 1,71 | 1,52 | 1,94 | 102,68  | * |
| 1554916_a_at | jerky homolog (mouse)                        | BC043351  | 8629            | gb:BC043351.1 /DB_XREF=gi:27 | 195,23  | 9,35  | 334,75  | 5,45  | 1,71 | 1,58 | 1,87 | 139,52  | * |
| 229115_at    | dynein, cytoplasmic, heavy polypeptide 1     | BF000332  | 1778            | gb:BF000332 /DB_XREF=gi:1070 | 448,81  | 5,95  | 762,94  | 3,5   | 1,7  | 1,66 | 1,74 | 314,13  | * |
| 227849_at    | Retinitis pigmentosa 9 (autosomal dominan    | BF438270  | 6100            | gb:BF438270 /DB_XREF=gi:1145 | 143,99  | 7,44  | 244,5   | 4,38  | 1,7  | 1,56 | 1,86 | 100,51  | * |
| 1557258_a_at | B-cell CLL/lymphoma 10                       | AA994334  | 8915            | gb:AA994334 /DB_XREF=gi:318  | 557,2   | 14,19 | 945,72  | 8,36  | 1,7  | 1,62 | 1,78 | 388,52  | * |
| 238628_s_at  | hematopoietic stem/progenitor cells 176      | AW827150  | 51693           | gb:AW827150 /DB_XREF=gi:792  | 183,8   | 12,03 | 313,02  | 7,07  | 1,7  | 1,53 | 1,92 | 129,21  | * |
| 218550_s_at  | leucine rich repeat containing 20            | NM_018205 | 55222           | gb:NM_018205.1 /DB_XREF=gi:8 | 164,47  | 12,81 | 278,79  | 7,56  | 1,7  | 1,49 | 1,96 | 114,31  | * |
| 208790_s_at  | polymerase I and transcript release factor   | AF312393  | 284119          | gb:AF312393.1 /DB_XREF=gi:11 | 552,19  | 38,43 | 939,84  | 22,58 | 1,7  | 1,52 | 1,93 | 387,65  | * |
| 227129_x_at  | hypothetical protein LOC284701 /// hypoth    | AW006934  | 8312 /// 3998   | gb:AW006934 /DB_XREF=gi:585  | 228,37  | 17,54 | 388,14  | 10,32 | 1,7  | 1,5  | 1,96 | 159,77  | * |
| 214870_x_at  | nuclear pore complex interacting protein //, | AC002045  | 7 /// 440341 // | gb:AC002045 /DB_XREF=gi:2951 | 358,39  | 14,65 | 610,06  | 8,6   | 1,7  | 1,59 | 1,83 | 251,68  | * |

|              |                                                  |           |               |                                 |         |       |         |       |      |      |      |         |   |
|--------------|--------------------------------------------------|-----------|---------------|---------------------------------|---------|-------|---------|-------|------|------|------|---------|---|
| 241223_x_at  | gb:AI821721 /DB_XREF=gi:5440800 /DB_XR           | AI821721  |               | gb:AI821721 /DB_XREF=gi:5440800 | 1075,82 | 39,64 | 1832,87 | 23,27 | 1,7  | 1,6  | 1,82 | 757,05  | * |
| 211756_at    | parathyroid hormone-like hormone /// para        | BC005961  | 5744          | gb:BC005961.1 /DB_XREF=gi:133   | 429,51  | 14,41 | 723,82  | 8,55  | 1,69 | 1,59 | 1,79 | 294,31  | * |
| 213799_s_at  | protein tyrosine phosphatase, receptor type      | BF740139  | 5786          | gb:BF740139 /DB_XREF=gi:1206    | 361,45  | 17,76 | 610,75  | 10,51 | 1,69 | 1,56 | 1,85 | 249,31  | * |
| 208947_s_at  | regulator of nonsense transcripts 1              | U59323    | 5976          | gb:U59323.1 /DB_XREF=gi:1633    | 159,21  | 4,7   | 269,3   | 2,78  | 1,69 | 1,61 | 1,78 | 110,09  | * |
| 202509_s_at  | tumor necrosis factor, alpha-induced protei      | AI862445  | 7127          | gb:AI862445 /DB_XREF=gi:5526    | 145,88  | 12,62 | 247,13  | 7,45  | 1,69 | 1,47 | 1,99 | 101,25  | * |
| 32062_at     | leucine rich repeat containing 14                | D25216    | 9684          | Cluster Incl. D25216:Human mR   | 1217,42 | 8,93  | 2059,22 | 5,28  | 1,69 | 1,67 | 1,71 | 841,8   | * |
| 212492_s_at  | jumonji domain containing 2B                     | AW237172  | 23030         | gb:AW237172 /DB_XREF=gi:656     | 205,67  | 16,22 | 346,55  | 9,63  | 1,69 | 1,48 | 1,95 | 140,88  | * |
| 223365_at    | DEAH (Asp-Glu-Ala-His) box polypeptide 37        | BC004463  | 57647         | gb:BC004463.1 /DB_XREF=gi:133   | 295,2   | 15,61 | 500,32  | 9,21  | 1,69 | 1,55 | 1,86 | 205,13  | * |
| 1560430_at   | NTPase, KAP family P-loop domain containir       | AK090919  | 284353        | gb:AK090919.1 /DB_XREF=gi:21    | 230,72  | 6,97  | 390,89  | 4,11  | 1,69 | 1,61 | 1,79 | 160,17  | * |
| 212113_at    | Similar to microtubule-associated proteins 1     | AI927479  | 387869        | gb:AI927479 /DB_XREF=gi:5663    | 363,18  | 11,56 | 612,49  | 6,85  | 1,69 | 1,6  | 1,78 | 249,31  | * |
| 225920_at    | hypothetical protein LOC148413 /// similar       | AW452640  | 8413 /// 4407 | gb:AW452640 /DB_XREF=gi:699     | 578,75  | 24,56 | 980,9   | 14,49 | 1,69 | 1,58 | 1,83 | 402,16  | * |
| 244624_at    | ribosomal protein S27a /// similar to bA92K      | AW013893  | 389425 //     | gb:AW013893 /DB_XREF=gi:586     | 241,57  | 2,06  | 408,06  | 1,22  | 1,69 | 1,66 | 1,71 | 166,49  | * |
| 207598_x_at  | X-ray repair complementing defective repair      | NM_005431 | 7516          | gb:NM_005431.1 /DB_XREF=gi:4    | 194,1   | 12,06 | 325,44  | 7,19  | 1,68 | 1,51 | 1,88 | 131,34  | * |
| 224828_at    | cytoplasmic polyadenylation element bindir       | AV704132  | 80315         | gb:AV704132 /DB_XREF=gi:1072    | 321,28  | 12,2  | 540,2   | 7,26  | 1,68 | 1,58 | 1,8  | 218,92  | * |
| 213485_s_at  | ATP-binding cassette, sub-family C (CFTR/M       | AK000002  | 89845         | gb:AK000002.1 /DB_XREF=gi:72    | 303,26  | 25,13 | 508,28  | 14,99 | 1,68 | 1,46 | 1,95 | 205,01  | * |
| 225009_at    | chemokine-like factor super family 4             | AA191708  | 146223        | gb:AA191708 /DB_XREF=gi:178     | 415,75  | 16,53 | 697,72  | 9,85  | 1,68 | 1,57 | 1,8  | 281,97  | * |
| 1561221_x_at | Hypothetical LOC387905                           | BC036362  | 387905        | gb:BC036362.1 /DB_XREF=gi:233   | 168,92  | 4,25  | 283,48  | 2,53  | 1,68 | 1,61 | 1,75 | 114,56  | * |
| 1567985_at   | Similar to calreticulin                          | AJ012500  | 441884        | gb:AJ012500.1 /DB_XREF=gi:544   | 192,26  | 11,08 | 322,4   | 6,6   | 1,68 | 1,52 | 1,86 | 130,14  | * |
| 225899_x_at  | hypothetical protein LOC284701 /// hypoth        | AL040396  | 9844 /// 4404 | gb:AL040396 /DB_XREF=gi:5409    | 287,08  | 12,32 | 481,38  | 7,35  | 1,68 | 1,56 | 1,81 | 194,3   | * |
| 213003_s_at  | gb:BF061054 /DB_XREF=gi:10819964 /DB_X           | BF061054  |               | gb:BF061054 /DB_XREF=gi:1081    | 377,64  | 4,25  | 636,16  | 2,52  | 1,68 | 1,65 | 1,72 | 258,52  | * |
| 221963_x_at  | Transcribed locus, strongly similar to XP_42     | BE999967  |               | gb:BE999967 /DB_XREF=gi:1070    | 468,11  | 26,68 | 785,12  | 15,9  | 1,68 | 1,52 | 1,86 | 317,02  | * |
| 204015_s_at  | dual specificity phosphatase 4                   | BC002671  | 1846          | gb:BC002671.1 /DB_XREF=gi:12    | 347,34  | 6,2   | 580,06  | 3,71  | 1,67 | 1,62 | 1,72 | 232,72  | * |
| 208891_at    | dual specificity phosphatase 6                   | BC003143  | 1848          | gb:BC003143.1 /DB_XREF=gi:133   | 851,57  | 11,66 | 1422,32 | 6,98  | 1,67 | 1,63 | 1,71 | 570,75  | * |
| 209996_x_at  | pericentriolar material 1                        | AA931266  | 5108          | gb:AA931266 /DB_XREF=gi:308     | 180,18  | 7,84  | 301,15  | 4,69  | 1,67 | 1,55 | 1,81 | 120,97  | * |
| 202936_s_at  | SRY (sex determining region Y)-box 9 (camp       | NM_000346 | 6662          | gb:NM_000346.1 /DB_XREF=gi:4    | 220,74  | 5,24  | 369,56  | 3,13  | 1,67 | 1,61 | 1,75 | 148,82  | * |
| 1555259_at   | Sterile alpha motif and leucine zipper contai    | AF465843  | 51776         | gb:AF465843.1 /DB_XREF=gi:283   | 188,22  | 7,2   | 315,13  | 4,3   | 1,67 | 1,57 | 1,79 | 126,92  | * |
| 239742_at    | Tubby like protein 4                             | H15278    | 56995         | gb:H15278 /DB_XREF=gi:88009     | 323,64  | 18,1  | 541,55  | 10,82 | 1,67 | 1,52 | 1,85 | 217,91  | * |
| 235009_at    | family with sequence similarity 44, member       | AI049791  | 259282        | gb:AI049791 /DB_XREF=gi:329     | 354,92  | 11,65 | 592,58  | 6,98  | 1,67 | 1,58 | 1,77 | 237,66  | * |
| 208297_s_at  | ecotropic viral integration site 5 /// similar t | NM_005665 | 40593 /// 781 | gb:NM_005665.1 /DB_XREF=gi:5    | 401,16  | 13,11 | 667,98  | 7,87  | 1,67 | 1,57 | 1,77 | 266,82  | * |
| 216858_x_at  | gb:AL080112.1 /DB_XREF=gi:5262539 /FEA=          | AL080112  |               | gb:AL080112.1 /DB_XREF=gi:52    | 318,44  | 10,23 | 531,37  | 6,13  | 1,67 | 1,58 | 1,77 | 212,94  | * |
| 202600_s_at  | nuclear receptor interacting protein 1           | AI824012  | 8204          | gb:AI824012 /DB_XREF=gi:5444    | 397,15  | 19,82 | 660,5   | 11,92 | 1,66 | 1,53 | 1,82 | 263,35  | * |
| 214869_x_at  | GTPase activating protein and VPS9 domain        | AK021533  | 26130         | gb:AK021533.1 /DB_XREF=gi:10    | 1036,93 | 14,72 | 1724,83 | 8,85  | 1,66 | 1,62 | 1,71 | 687,9   | * |
| 208721_s_at  | anaphase promoting complex subunit 5             | BF967271  | 51433         | gb:BF967271 /DB_XREF=gi:1233    | 443,31  | 14,22 | 736,34  | 8,56  | 1,66 | 1,57 | 1,76 | 293,03  | * |
| 242895_x_at  | Ring finger protein 39                           | R63837    | 80352         | gb:R63837 /DB_XREF=gi:835716    | 313,21  | 4,23  | 520,9   | 2,55  | 1,66 | 1,62 | 1,7  | 207,7   | * |
| 1564362_x_at | hypothetical protein MGC46336                    | AK096248  | 283933        | gb:AK096248.1 /DB_XREF=gi:21    | 275,8   | 12,28 | 457,87  | 7,4   | 1,66 | 1,54 | 1,8  | 182,08  | * |
| 207679_at    | paired box gene 3 (Waardenburg syndrome          | NM_000438 | 5077          | gb:NM_000438.2 /DB_XREF=gi:6    | 191,36  | 5,27  | 315,96  | 3,19  | 1,65 | 1,57 | 1,73 | 124,6   | * |
| 204275_at    | small optic lobes homolog (Drosophila)           | AI796687  | 6650          | gb:AI796687 /DB_XREF=gi:5362    | 301,65  | 8,61  | 496,39  | 5,23  | 1,65 | 1,57 | 1,73 | 194,73  | * |
| 215568_x_at  | Lysophospholipase II                             | AL031295  | 11313         | gb:AL031295 /DB_XREF=gi:4376    | 1186,35 | 8,03  | 1952,71 | 4,88  | 1,65 | 1,63 | 1,67 | 766,35  | * |
| 216222_s_at  | myosin X                                         | AI561354  | 4651          | gb:AI561354 /DB_XREF=gi:4511    | 1119,93 | 23,31 | 1841,96 | 14,18 | 1,64 | 1,59 | 1,71 | 722,03  | * |
| 209136_s_at  | ubiquitin specific protease 10                   | BG390445  | 9100          | gb:BG390445 /DB_XREF=gi:132     | 544     | 18,94 | 891,1   | 11,56 | 1,64 | 1,54 | 1,74 | 347,1   | * |
| 41387_r_at   | jumonji domain containing 3                      | AB002344  | 23135         | Cluster Incl. AB002344:Human r  | 266,5   | 9,22  | 437,06  | 5,62  | 1,64 | 1,55 | 1,75 | 170,56  | * |
| 1555947_at   | chromosome 9 open reading frame 10               | AU116818  | 23196         | gb:AU116818 /DB_XREF=gi:109     | 202,67  | 9,25  | 333,23  | 5,63  | 1,64 | 1,52 | 1,79 | 130,55  | * |
| 222456_s_at  | epithelial protein lost in neoplasm beta         | BF197289  | 51474         | gb:BF197289 /DB_XREF=gi:1108    | 475,32  | 15,41 | 778,91  | 9,4   | 1,64 | 1,55 | 1,74 | 303,59  | * |
| 224775_at    | hypothetical protein FLJ10006                    | AW451291  | 55677         | gb:AW451291 /DB_XREF=gi:699     | 265,47  | 20,22 | 434,6   | 12,35 | 1,64 | 1,44 | 1,89 | 169,13  | * |
| 202124_s_at  | amyotrophic lateral sclerosis 2 (juvenile) chi   | AV705253  | 66008         | gb:AV705253 /DB_XREF=gi:1072    | 395,41  | 13,44 | 648,31  | 8,19  | 1,64 | 1,55 | 1,74 | 252,9   | * |
| 233702_x_at  | CDNA: FLJ20946 fis, clone ADSE01819              | AK024599  |               | gb:AK024599.1 /DB_XREF=gi:10    | 796,23  | 25,19 | 1306,18 | 15,36 | 1,64 | 1,55 | 1,74 | 509,95  | * |
| 215615_x_at  | Arginine-glutamic acid dipeptide (RE) repeat     | AU148274  | 473           | gb:AU148274 /DB_XREF=gi:110     | 1770,15 | 17,12 | 2887,77 | 10,5  | 1,63 | 1,6  | 1,66 | 1117,62 | * |
| 204680_s_at  | Rap guanine nucleotide exchange factor (GE       | AI263837  | 9771          | gb:AI263837 /DB_XREF=gi:3872    | 187,93  | 8,41  | 306,73  | 5,15  | 1,63 | 1,51 | 1,77 | 118,8   | * |
| 241642_x_at  | tousled-like kinase 1                            | AI791189  | 9874          | gb:AI791189 /DB_XREF=gi:5338    | 198,19  | 4,35  | 322,23  | 2,67  | 1,63 | 1,57 | 1,69 | 124,03  | * |
| 1555058_a_at | lysophosphatidylglycerol acyltransferase 1       | BC034621  | 9926          | gb:BC034621.1 /DB_XREF=gi:22    | 869,55  | 47,59 | 1420,84 | 29,13 | 1,63 | 1,49 | 1,81 | 551,29  | * |

|              |                                                |           |        |                                |         |       |         |       |      |      |      |         |   |
|--------------|------------------------------------------------|-----------|--------|--------------------------------|---------|-------|---------|-------|------|------|------|---------|---|
| 233487_s_at  | leucine rich repeat containing 8               | AK024649  | 56262  | gb:AK024649.1 /DB_XREF=gi:10   | 490,6   | 19,18 | 802     | 11,73 | 1,63 | 1,53 | 1,75 | 311,4   | * |
| 237475_x_at  | CH5400                                         | AI151104  |        | gb:AI151104 /DB_XREF=gi:3679   | 763,99  | 15,78 | 1241,97 | 9,7   | 1,63 | 1,57 | 1,69 | 477,97  | * |
| 209457_at    | dual specificity phosphatase 5                 | U16996    | 1847   | gb:U16996.1 /DB_XREF=gi:6420   | 284,06  | 15,92 | 459,15  | 9,85  | 1,62 | 1,47 | 1,79 | 175,09  | * |
| 213944_x_at  | guanine nucleotide binding protein (G prote    | BG236220  | 2767   | gb:BG236220 /DB_XREF=gi:1275   | 212,05  | 14,33 | 344,33  | 8,82  | 1,62 | 1,45 | 1,84 | 132,28  | * |
| 205787_x_at  | KIAA0663 gene product                          | AI803216  | 9877   | gb:AI803216 /DB_XREF=gi:5368   | 808,73  | 14,32 | 1311,44 | 8,83  | 1,62 | 1,57 | 1,67 | 502,71  | * |
| 201793_x_at  | chromosome 1 open reading frame 16             | BF509099  | 9887   | gb:BF509099 /DB_XREF=gi:1159   | 422,43  | 12,67 | 684,55  | 7,82  | 1,62 | 1,54 | 1,71 | 262,12  | * |
| 212886_at    | DKFZP434C171 protein                           | AL080169  | 26112  | gb:AL080169.1 /DB_XREF=gi:52   | 308,27  | 19,33 | 498,58  | 11,95 | 1,62 | 1,45 | 1,82 | 190,32  | * |
| 201299_s_at  | MOB1, Mps One Binder kinase activator-like     | NM_018221 | 55233  | gb:NM_018221.1 /DB_XREF=gi:8   | 2013,26 | 74,8  | 3261,59 | 46,17 | 1,62 | 1,52 | 1,73 | 1248,33 | * |
| 209346_s_at  | phosphatidylinositol 4-kinase type II          | BC003167  | 55361  | gb:BC003167.1 /DB_XREF=gi:13   | 211,82  | 18,2  | 344,08  | 11,21 | 1,62 | 1,41 | 1,91 | 132,26  | * |
| 1558080_s_at | hypothetical protein LOC144871                 | BG913589  | 144871 | gb:BG913589 /DB_XREF=gi:142    | 496,28  | 15,22 | 805,97  | 9,37  | 1,62 | 1,54 | 1,72 | 309,68  | * |
| 201041_s_at  | dual specificity phosphatase 1                 | NM_004417 | 1843   | gb:NM_004417.2 /DB_XREF=gi:7   | 1517,13 | 43,77 | 2446,62 | 27,14 | 1,61 | 1,53 | 1,7  | 929,5   | * |
| 209701_at    | type 1 tumor necrosis factor receptor shedc    | D16217    | 51752  | gb:D16217.1 /DB_XREF=gi:3035   | 339,66  | 11,4  | 547,72  | 7,07  | 1,61 | 1,52 | 1,71 | 208,06  | * |
| 49679_s_at   | hypothetical LOC400843                         | AA243774  | 400843 | Cluster Incl. AA243774:zr67d03 | 375,97  | 15,77 | 606,8   | 9,77  | 1,61 | 1,5  | 1,74 | 230,83  | * |
| 232596_at    | gb:AL354829 /DB_XREF=gi:8670914 /FEA=D         | AL354829  |        | gb:AL354829 /DB_XREF=gi:8670   | 809,99  | 31,07 | 1304,72 | 19,29 | 1,61 | 1,51 | 1,73 | 494,73  | * |
| 201791_s_at  | 7-dehydrocholesterol reductase                 | NM_001360 | 1717   | gb:NM_001360.1 /DB_XREF=gi:4   | 1514,57 | 26,2  | 2429,52 | 16,33 | 1,6  | 1,56 | 1,65 | 914,95  | * |
| 200841_s_at  | glutamyl-prolyl-tRNA synthetase                | AI142677  | 2058   | gb:AI142677 /DB_XREF=gi:3659   | 776,89  | 30,77 | 1239,32 | 19,29 | 1,6  | 1,49 | 1,71 | 462,42  | * |
| 204863_s_at  | interleukin 6 signal transducer (gp130, onco   | BE856546  | 3572   | gb:BE856546 /DB_XREF=gi:1036   | 471,76  | 20,68 | 755,1   | 12,92 | 1,6  | 1,48 | 1,73 | 283,34  | * |
| 211000_s_at  | interleukin 6 signal transducer (gp130, onco   | AB015706  | 3572   | gb:AB015706.1 /DB_XREF=gi:49   | 278,73  | 15    | 447,16  | 9,35  | 1,6  | 1,46 | 1,77 | 168,44  | * |
| 216450_x_at  | tumor rejection antigen (gp96) 1               | AK025862  | 7184   | gb:AK025862.1 /DB_XREF=gi:10   | 1011,99 | 18,88 | 1614,33 | 11,83 | 1,6  | 1,54 | 1,65 | 602,34  | * |
| 218565_at    | chromosome 9 open reading frame 114            | BG223334  | 51490  | gb:BG223334 /DB_XREF=gi:127    | 223,7   | 15,27 | 357,72  | 9,55  | 1,6  | 1,42 | 1,81 | 134,02  | * |
| 37170_at     | BMP2 inducible kinase                          | AB015331  | 55589  | Cluster Incl. AB015331:Homo sa | 192,03  | 5,45  | 306,7   | 3,41  | 1,6  | 1,52 | 1,68 | 114,67  | * |
| 216490_x_at  | similar to dJ408B20.3 (novel protein similar   | AL133267  | 442175 | gb:AL133267 /DB_XREF=gi:1018   | 499,61  | 5,94  | 797,34  | 3,72  | 1,6  | 1,56 | 1,63 | 297,73  | * |
| 214974_x_at  | chemokine (C-X-C motif) ligand 5               | AK026546  | 6374   | gb:AK026546.1 /DB_XREF=gi:10   | 416,83  | 1,12  | 663,82  | 0,7   | 1,59 | 1,59 | 1,6  | 246,99  | * |
| 1557227_s_at | translocated promoter region (to activated     | AW235355  | 7175   | gb:AW235355 /DB_XREF=gi:656    | 704,59  | 32,74 | 1118,33 | 20,63 | 1,59 | 1,47 | 1,73 | 413,74  | * |
| 204047_s_at  | phosphatase and actin regulator 2              | AW295193  | 9749   | gb:AW295193 /DB_XREF=gi:670    | 180,3   | 18,38 | 286,46  | 11,57 | 1,59 | 1,34 | 1,93 | 106,15  | * |
| 223295_s_at  | LUC7-like (S. cerevisiae)                      | BE049621  | 55692  | gb:BE049621 /DB_XREF=gi:8366   | 303,63  | 13,78 | 481,58  | 8,69  | 1,59 | 1,47 | 1,72 | 177,95  | * |
| 242608_x_at  | Zinc finger protein 410                        | AW517479  | 57862  | gb:AW517479 /DB_XREF=gi:715    | 285,16  | 9,45  | 452,36  | 5,96  | 1,59 | 1,5  | 1,68 | 167,19  | * |
| 228633_s_at  | LYST-interacting protein LIP8                  | AI668799  | 116840 | gb:AI668799 /DB_XREF=gi:4833   | 268,6   | 12,74 | 426,6   | 8,02  | 1,59 | 1,46 | 1,73 | 158     | * |
| 241418_at    | Hypothetical LOC344887                         | AI819386  | 344887 | gb:AI819386 /DB_XREF=gi:5438   | 183,73  | 11,22 | 292,46  | 7,05  | 1,59 | 1,43 | 1,78 | 108,74  | * |
| 217878_s_at  | cell division cycle 27                         | AI203880  | 996    | gb:AI203880 /DB_XREF=gi:3756   | 2264,65 | 71,18 | 3573,72 | 45,11 | 1,58 | 1,49 | 1,67 | 1309,07 | * |
| 215541_s_at  | diaphanous homolog 1 (Drosophila)              | AK023345  | 1729   | gb:AK023345.1 /DB_XREF=gi:10   | 880,97  | 21,74 | 1393,07 | 13,75 | 1,58 | 1,51 | 1,65 | 512,1   | * |
| 202176_at    | excision repair cross-complementing rodent     | NM_000122 | 2071   | gb:NM_000122.1 /DB_XREF=gi:4   | 385,51  | 25,31 | 610,93  | 15,97 | 1,58 | 1,42 | 1,79 | 225,42  | * |
| 202118_s_at  | copine III                                     | AA541758  | 8895   | gb:AA541758 /DB_XREF=gi:228    | 1145,62 | 36,82 | 1812,82 | 23,27 | 1,58 | 1,5  | 1,68 | 667,2   | * |
| 203463_s_at  | epsin 2                                        | H05668    | 22905  | gb:H05668 /DB_XREF=gi:86922    | 487,8   | 9,23  | 771,79  | 5,83  | 1,58 | 1,53 | 1,64 | 283,98  | * |
| 217678_at    | solute carrier family 7, (cationic amino acid  | AA488687  | 23657  | gb:AA488687 /DB_XREF=gi:221    | 681,23  | 25,66 | 1073,15 | 16,29 | 1,58 | 1,48 | 1,69 | 391,92  | * |
| 221985_at    | DRE1 protein                                   | AW006750  | 54800  | gb:AW006750 /DB_XREF=gi:585    | 419,42  | 13,71 | 661,62  | 8,69  | 1,58 | 1,49 | 1,67 | 242,2   | * |
| 222027_at    | Nuclear ubiquitous casein kinase and cyclin-   | AW515443  | 64710  | gb:AW515443 /DB_XREF=gi:715    | 879,23  | 36,05 | 1391,62 | 22,78 | 1,58 | 1,47 | 1,71 | 512,39  | * |
| 228986_at    | oxysterol binding protein-like 8               | AW978375  | 114882 | gb:AW978375 /DB_XREF=gi:816    | 1103,15 | 32,78 | 1745,08 | 20,72 | 1,58 | 1,5  | 1,67 | 641,94  | * |
| 239486_at    | Transcribed locus                              | BG111636  |        | gb:BG111636 /DB_XREF=gi:126    | 657,21  | 17,21 | 1037,11 | 10,9  | 1,58 | 1,51 | 1,65 | 379,89  | * |
| 208624_s_at  | eukaryotic translation initiation factor 4 gan | BE966878  | 1981   | gb:BE966878 /DB_XREF=gi:1177   | 1788,42 | 34,7  | 2816,04 | 22,04 | 1,57 | 1,52 | 1,63 | 1027,61 | * |
| 212240_s_at  | phosphoinositide-3-kinase, regulatory subu     | AI679268  | 5295   | gb:AI679268 /DB_XREF=gi:4889   | 647,28  | 13,9  | 1016,78 | 8,85  | 1,57 | 1,51 | 1,63 | 369,49  | * |
| 203759_at    | ST3 beta-galactoside alpha-2,3-sialyltransfer  | NM_006278 | 6484   | gb:NM_006278.1 /DB_XREF=gi:5   | 253,16  | 21,98 | 398,24  | 13,98 | 1,57 | 1,36 | 1,85 | 145,09  | * |
| 213494_s_at  | YY1 transcription factor                       | AA748649  | 7528   | gb:AA748649 /DB_XREF=gi:278    | 349,6   | 10,28 | 549,45  | 6,54  | 1,57 | 1,49 | 1,66 | 199,84  | * |
| 215553_x_at  | WD repeat domain 45                            | AK024315  | 11152  | gb:AK024315.1 /DB_XREF=gi:10   | 543,13  | 5,85  | 853,61  | 3,72  | 1,57 | 1,54 | 1,6  | 310,48  | * |
| 241955_at    | HECT domain containing 1                       | BE243270  | 25831  | gb:BE243270 /DB_XREF=gi:9095   | 1378,06 | 48,74 | 2165,46 | 31,02 | 1,57 | 1,48 | 1,68 | 787,4   | * |
| 204324_s_at  | golgi phosphoprotein 4                         | NM_014498 | 27333  | gb:NM_014498.1 /DB_XREF=gi:7   | 688,29  | 7,3   | 1077,18 | 4,66  | 1,57 | 1,54 | 1,59 | 388,89  | * |
| 224469_s_at  | chromosome 14 open reading frame 151 //,       | BC006173  | 84800  | gb:BC006173.1 /DB_XREF=gi:13   | 438,57  | 9,25  | 690,41  | 5,88  | 1,57 | 1,52 | 1,64 | 251,84  | * |
| 238547_at    | hypothetical protein MGC39389                  | AI972367  | 124790 | gb:AI972367 /DB_XREF=gi:5769   | 192,74  | 2,56  | 302,89  | 1,63  | 1,57 | 1,54 | 1,61 | 110,15  | * |
| 243724_at    | gb:AW979182 /DB_XREF=gi:8170469 /DB_x          | AW979182  |        | gb:AW979182 /DB_XREF=gi:817    | 182,08  | 1,7   | 285,72  | 1,08  | 1,57 | 1,54 | 1,6  | 103,63  | * |
| 242979_at    | Transcribed locus                              | AI474666  |        | gb:AI474666 /DB_XREF=gi:4327   | 183,08  | 12,1  | 287,44  | 7,7   | 1,57 | 1,4  | 1,78 | 104,36  | * |

|             |                                                 |           |        |                                 |         |        |         |        |      |      |      |         |   |
|-------------|-------------------------------------------------|-----------|--------|---------------------------------|---------|--------|---------|--------|------|------|------|---------|---|
| 227547_at   | Transcribed locus, weakly similar to XP_496     | AA824321  |        | gb:AA824321 /DB_XREF=gi:2896    | 210,38  | 5,03   | 329,77  | 3,21   | 1,57 | 1,5  | 1,64 | 119,39  | * |
| 209164_s_at | cytochrome b-561                                | BC002976  | 1534   | gb:BC002976.1 /DB_XREF=gi:124   | 252,24  | 12,25  | 394,08  | 7,84   | 1,56 | 1,44 | 1,71 | 141,83  | * |
| 211074_at   | folate receptor 1 (adult) /// folate receptor   | AF000381  | 2348   | gb:AF000381.1 /DB_XREF=gi:256   | 413,11  | 9,49   | 643,71  | 6,09   | 1,56 | 1,5  | 1,62 | 230,6   | * |
| 211094_s_at | neurofibromin 1 (neurofibromatosis, von Re      | D12625    | 4763   | gb:D12625.1 /DB_XREF=gi:2199    | 350,79  | 11,5   | 548,53  | 7,35   | 1,56 | 1,48 | 1,66 | 197,74  | * |
| 221830_at   | RAP2A, member of RAS oncogene family            | AI302106  | 5911   | gb:AI302106 /DB_XREF=gi:39614   | 525,11  | 25,59  | 820,07  | 16,39  | 1,56 | 1,44 | 1,71 | 294,96  | * |
| 201070_x_at | splicing factor 3b, subunit 1, 155kDa           | AI739389  | 23451  | gb:AI739389 /DB_XREF=gi:5101    | 820,19  | 48,48  | 1277,13 | 31,13  | 1,56 | 1,41 | 1,74 | 456,94  | * |
| 223584_s_at | kelch repeat and BTB (POZ) domain containi      | BF000166  | 25948  | gb:BF000166 /DB_XREF=gi:1070    | 432,52  | 9,06   | 673,5   | 5,82   | 1,56 | 1,5  | 1,62 | 240,99  | * |
| 221649_s_at | peter pan homolog (Drosophila)                  | BC000535  | 56342  | gb:BC000535.1 /DB_XREF=gi:124   | 554,65  | 11,41  | 867,77  | 7,29   | 1,56 | 1,51 | 1,62 | 313,13  | * |
| 1558822_at  | AT rich interactive domain 1B (SWI1-like)       | AF147412  | 57492  | gb:AF147412.1 /DB_XREF=gi:476   | 309,91  | 1,98   | 481,93  | 1,28   | 1,56 | 1,54 | 1,57 | 172,01  | * |
| 211993_at   | WNK lysine deficient protein kinase 1 /// WI    | AI768512  | 65125  | gb:AI768512 /DB_XREF=gi:5235    | 988,07  | 52,37  | 1541,73 | 33,56  | 1,56 | 1,42 | 1,72 | 553,67  | * |
| 225954_s_at | midnolin                                        | AL512725  | 90007  | gb:AL512725.1 /DB_XREF=gi:122   | 656,36  | 9,87   | 1022,35 | 6,33   | 1,56 | 1,52 | 1,6  | 366     | * |
| 227633_at   | gb:AA056145 /DB_XREF=gi:1548483 /DB_XI          | AA056145  |        | gb:AA056145 /DB_XREF=gi:1548    | 259,52  | 6,52   | 405,64  | 4,17   | 1,56 | 1,5  | 1,64 | 146,12  | * |
| 204470_at   | chemokine (C-X-C motif) ligand 1 (melanom       | NM_001511 | 2919   | gb:NM_001511.1 /DB_XREF=gi:4    | 393,79  | 8,3    | 608,84  | 5,37   | 1,55 | 1,49 | 1,61 | 215,04  | * |
| 203752_s_at | jun D proto-oncogene                            | NM_005354 | 3727   | gb:NM_005354.2 /DB_XREF=gi:1    | 832,18  | 18,05  | 1292,39 | 11,62  | 1,55 | 1,49 | 1,62 | 460,21  | * |
| 215498_s_at | mitogen-activated protein kinase kinase 3 /,    | AA780381  | 5606   | gb:AA780381 /DB_XREF=gi:2835    | 428,34  | 17,22  | 665,81  | 11,08  | 1,55 | 1,45 | 1,67 | 237,46  | * |
| 201039_s_at | RAD23 homolog A (S. cerevisiae)                 | BF572938  | 5886   | gb:BF572938 /DB_XREF=gi:1164    | 805,69  | 49,31  | 1245,48 | 31,9   | 1,55 | 1,39 | 1,73 | 439,79  | * |
| 201085_s_at | SON DNA binding protein                         | AA664291  | 6651   | gb:AA664291 /DB_XREF=gi:2618    | 1418,29 | 87,93  | 2202,65 | 56,62  | 1,55 | 1,4  | 1,74 | 784,36  | * |
| 214305_s_at | splicing factor 3b, subunit 1, 155kDa           | AW003030  | 23451  | gb:AW003030 /DB_XREF=gi:584     | 1105,65 | 48,8   | 1715,34 | 31,45  | 1,55 | 1,44 | 1,68 | 609,69  | * |
| 203899_s_at | calcitonin gene-related peptide-receptor co     | NM_014478 | 27297  | gb:NM_014478.1 /DB_XREF=gi:7    | 404,25  | 21,85  | 627,29  | 14,08  | 1,55 | 1,41 | 1,71 | 223,04  | * |
| 46665_at    | sema domain, immunoglobulin domain (Ig),        | AI949392  | 54910  | Cluster Incl. AI949392:wq11a04. | 443,14  | 14,68  | 687,54  | 9,46   | 1,55 | 1,46 | 1,65 | 244,4   | * |
| 223907_s_at | PIN2-interacting protein 1                      | AF205718  | 54984  | gb:AF205718.1 /DB_XREF=gi:105   | 304,96  | 19,1   | 472,06  | 12,34  | 1,55 | 1,39 | 1,74 | 167,1   | * |
| 206460_at   | transmembrane protein SHREW1                    | NM_018836 | 55966  | gb:NM_018836.1 /DB_XREF=gi:5    | 377,52  | 16,46  | 584,62  | 10,63  | 1,55 | 1,44 | 1,68 | 207,11  | * |
| 237333_at   | Syncoilin, intermediate filament 1              | T90771    | 81493  | gb:T90771 /DB_XREF=gi:722684    | 447,42  | 17,7   | 694,45  | 11,4   | 1,55 | 1,45 | 1,67 | 247,03  | * |
| 224346_at   | gb:AF116671.1 /DB_XREF=gi:7959840 /FEA-         | AF116671  |        | gb:AF116671.1 /DB_XREF=gi:795   | 184,33  | 9,03   | 285,96  | 5,82   | 1,55 | 1,43 | 1,7  | 101,63  | * |
| 202859_x_at | interleukin 8                                   | NM_000584 | 3576   | gb:NM_000584.1 /DB_XREF=gi:1    | 1034,62 | 9,12   | 1589,1  | 5,93   | 1,54 | 1,51 | 1,56 | 554,49  | * |
| 201831_s_at | vesicle docking protein p115                    | BE875592  | 8615   | gb:BE875592 /DB_XREF=gi:1032    | 998,24  | 18,84  | 1538,44 | 12,22  | 1,54 | 1,49 | 1,59 | 540,2   | * |
| 223196_s_at | sestrin 2                                       | AL136551  | 83667  | gb:AL136551.1 /DB_XREF=gi:132   | 358,79  | 6,28   | 551,91  | 4,08   | 1,54 | 1,49 | 1,59 | 193,12  | * |
| 230188_at   | hypothetical protein LOC348938                  | AW138350  | 348938 | gb:AW138350 /DB_XREF=gi:614     | 242,24  | 12,46  | 373,38  | 8,08   | 1,54 | 1,41 | 1,69 | 131,15  | * |
| 213926_s_at | HIV-1 Rev binding protein                       | AI742626  | 3267   | gb:AI742626 /DB_XREF=gi:51105   | 262,67  | 9,31   | 401,53  | 6,09   | 1,53 | 1,44 | 1,63 | 138,86  | * |
| 215628_x_at | Protein phosphatase 2 (formerly 2A), cataly     | AL049285  | 5515   | gb:AL049285.1 /DB_XREF=gi:450   | 238,53  | 18,37  | 364,21  | 12,03  | 1,53 | 1,34 | 1,77 | 125,69  | * |
| 204611_s_at | protein phosphatase 2, regulatory subunit B     | NM_006244 | 5526   | gb:NM_006244.1 /DB_XREF=gi:5    | 204,68  | 1,46   | 313,99  | 0,95   | 1,53 | 1,51 | 1,55 | 109,31  | * |
| 212332_at   | retinoblastoma-like 2 (p130)                    | BF110947  | 5934   | gb:BF110947 /DB_XREF=gi:1094    | 236,18  | 9,02   | 361,83  | 5,89   | 1,53 | 1,43 | 1,64 | 125,64  | * |
| 243256_at   | MAP kinase interacting serine/threonine kin     | AW796364  | 8569   | gb:AW796364 /DB_XREF=gi:784     | 206,99  | 6,8    | 316,77  | 4,44   | 1,53 | 1,44 | 1,63 | 109,79  | * |
| 203055_s_at | Rho guanine nucleotide exchange factor (GE      | NM_004706 | 9138   | gb:NM_004706.1 /DB_XREF=gi:4    | 355,4   | 7,12   | 543,55  | 4,65   | 1,53 | 1,48 | 1,59 | 188,15  | * |
| 32094_at    | carbohydrate (chondroitin 6) sulfotransfera     | AB017915  | 9469   | Cluster Incl. AB017915:Homo sa  | 519,12  | 16,35  | 793,82  | 10,69  | 1,53 | 1,45 | 1,62 | 274,7   | * |
| 223577_x_at | PRO1073 protein                                 | AA827878  | 29005  | gb:AA827878 /DB_XREF=gi:2900    | 1394,16 | 38,72  | 2132,25 | 25,32  | 1,53 | 1,46 | 1,61 | 738,09  | * |
| 221501_x_at | hypothetical protein LOC339047                  | AF229069  | 339047 | gb:AF229069.1 /DB_XREF=gi:898   | 462,09  | 13,27  | 708,55  | 8,65   | 1,53 | 1,46 | 1,62 | 246,46  | * |
| 239046_at   | Transcribed locus                               | AA322245  |        | gb:AA322245 /DB_XREF=gi:1974    | 423,67  | 12,56  | 648,01  | 8,21   | 1,53 | 1,45 | 1,61 | 224,34  | * |
| 206562_s_at | casein kinase 1, alpha 1                        | NM_001892 | 1452   | gb:NM_001892.1 /DB_XREF=gi:4    | 3154,25 | 170,1  | 4800,2  | 111,77 | 1,52 | 1,39 | 1,68 | 1645,95 | * |
| 213957_s_at | centrosome-associated protein 350               | AA635523  | 9857   | gb:AA635523 /DB_XREF=gi:2555    | 362,39  | 15,99  | 551,65  | 10,5   | 1,52 | 1,41 | 1,65 | 189,26  | * |
| 222439_s_at | thyroid hormone receptor associated protei      | BE967048  | 9967   | gb:BE967048 /DB_XREF=gi:1177    | 2812,98 | 100,61 | 4262,67 | 66,39  | 1,52 | 1,42 | 1,62 | 1449,69 | * |
| 205018_s_at | muscleblind-like 2 (Drosophila)                 | NM_005757 | 10150  | gb:NM_005757.2 /DB_XREF=gi:5    | 274,8   | 9,85   | 416,55  | 6,5    | 1,52 | 1,42 | 1,62 | 141,76  | * |
| 208003_s_at | nuclear factor of activated T-cells 5, tonicity | NM_006599 | 10725  | gb:NM_006599.1 /DB_XREF=gi:5    | 381,83  | 21,95  | 581,15  | 14,42  | 1,52 | 1,38 | 1,69 | 199,32  | * |
| 212553_at   | KIAA0460 protein                                | AK026120  | 23248  | gb:AK026120.1 /DB_XREF=gi:104   | 693,41  | 10,26  | 1050,72 | 6,77   | 1,52 | 1,48 | 1,56 | 357,31  | * |
| 218030_at   | G protein-coupled receptor kinase interacto     | NM_014030 | 28964  | gb:NM_014030.1 /DB_XREF=gi:7    | 1063,76 | 10,05  | 1616,5  | 6,61   | 1,52 | 1,49 | 1,55 | 552,74  | * |
| 219742_at   | proline rich 7 (synaptic)                       | NM_030567 | 80758  | gb:NM_030567.1 /DB_XREF=gi:1    | 218,88  | 7,32   | 333,74  | 4,8    | 1,52 | 1,44 | 1,62 | 114,86  | * |
| 233543_s_at | hypothetical protein FLJ13614                   | AK021582  | 84142  | gb:AK021582.1 /DB_XREF=gi:104   | 204,58  | 15,24  | 310,29  | 10,05  | 1,52 | 1,33 | 1,75 | 105,71  | * |
| 1565641_at  | Chromosome 16 open reading frame 45             | BE503823  | 89927  | gb:BE503823 /DB_XREF=gi:9706    | 213,69  | 7,71   | 324,64  | 5,08   | 1,52 | 1,43 | 1,62 | 110,95  | * |
| 241706_at   | gb:AA431782 /DB_XREF=gi:2115490 /DB_XI          | AA431782  |        | gb:AA431782 /DB_XREF=gi:2115    | 435,02  | 4,81   | 661,42  | 3,16   | 1,52 | 1,49 | 1,55 | 226,4   | * |
| 239452_at   | Transcribed locus                               | AI088640  |        | gb:AI088640 /DB_XREF=gi:34271   | 311,4   | 4,47   | 473,15  | 2,94   | 1,52 | 1,48 | 1,56 | 161,75  | * |



|              |                                                 |           |                |                               |         |       |         |        |       |       |       |          |   |
|--------------|-------------------------------------------------|-----------|----------------|-------------------------------|---------|-------|---------|--------|-------|-------|-------|----------|---|
| 209661_at    | kinesin family member C3                        | BC001211  | 3801           | gb:BC001211.1 /DB_XREF=gi:121 | 385,54  | 5,95  | 583,84  | 3,93   | 1,51  | 1,47  | 1,56  | 198,3    | * |
| 209039_x_at  | EH-domain containing 1                          | AF001434  | 10938          | gb:AF001434.1 /DB_XREF=gi:25  | 622,46  | 4     | 937,89  | 2,66   | 1,51  | 1,49  | 1,52  | 315,43   | * |
| 1558747_at   | structural maintenance of chromosomes fle       | AA336502  | 23347          | gb:AA336502 /DB_XREF=gi:198   | 255,98  | 24,84 | 385,64  | 16,49  | 1,51  | 1,28  | 1,81  | 129,66   | * |
| 207253_s_at  | ubiquitin 1                                     | NM_016936 | 29855          | gb:NM_016936.1 /DB_XREF=gi:5  | 529,85  | 6,61  | 799,3   | 4,38   | 1,51  | 1,48  | 1,54  | 269,44   | * |
| 222626_at    | chromosome 13 open reading frame 10             | T79937    | 64062          | gb:T79937 /DB_XREF=gi:698446  | 314,98  | 10,66 | 476,88  | 7,04   | 1,51  | 1,43  | 1,61  | 161,9    | * |
| 218762_at    | zinc finger protein 574                         | NM_022752 | 64763          | gb:NM_022752.1 /DB_XREF=gi:1  | 201,11  | 12,33 | 302,97  | 8,19   | 1,51  | 1,35  | 1,69  | 101,86   | * |
| 227292_at    | hypothetical protein BC007540                   | AI866590  | 144097         | gb:AI866590 /DB_XREF=gi:5530  | 751,66  | 15,73 | 1135,15 | 10,42  | 1,51  | 1,46  | 1,57  | 383,49   | * |
| 1558723_at   | hypothetical protein LOC284014                  | AK095567  | 284014         | gb:AK095567.1 /DB_XREF=gi:21  | 248,55  | 4,49  | 374,37  | 2,98   | 1,51  | 1,46  | 1,56  | 125,82   | * |
| 1555742_at   | gb:U92817.1 /DB_XREF=gi:2465327 /TID=H          | U92817    |                | gb:U92817.1 /DB_XREF=gi:2465  | 236,75  | 14,3  | 358,24  | 9,45   | 1,51  | 1,36  | 1,69  | 121,49   | * |
| 213384_x_at  | phospholipase C, beta 3 (phosphatidylinosit     | Z37544    | 5331           | gb:Z37544 /DB_XREF=gi:609185  | 818,37  | 43,35 | 1226,29 | 28,93  | 1,5   | 1,37  | 1,65  | 407,93   | * |
| 1569188_s_at | Ribosomal protein L10                           | BC021806  | 6134           | gb:BC021806.1 /DB_XREF=gi:21  | 218,61  | 2,5   | 327,73  | 1,67   | 1,5   | 1,47  | 1,53  | 109,12   | * |
| 1558924_s_at | restin (Reed-Steinberg cell-expressed intern    | BF673049  | 6249           | gb:BF673049 /DB_XREF=gi:1194  | 701,61  | 25,73 | 1052,67 | 17,15  | 1,5   | 1,41  | 1,61  | 351,06   | * |
| 202241_at    | tribbles homolog 1 (Drosophila)                 | NM_025195 | 10221          | gb:NM_025195.1 /DB_XREF=gi:1  | 398,99  | 24,89 | 598,68  | 16,59  | 1,5   | 1,35  | 1,69  | 199,69   | * |
| 220511_s_at  | deleted in liver cancer 1                       | NM_024767 | 10395          | gb:NM_024767.1 /DB_XREF=gi:1  | 282,03  | 1,81  | 423,15  | 1,21   | 1,5   | 1,48  | 1,52  | 141,13   | * |
| 223578_x_at  | PRO1073 protein                                 | AF113016  | 29005          | gb:AF113016.1 /DB_XREF=gi:66  | 459,87  | 25,17 | 690,97  | 16,75  | 1,5   | 1,37  | 1,66  | 231,1    | * |
| 227152_at    | hypothetical protein FLJ10652                   | AI979334  | 55196          | gb:AI979334 /DB_XREF=gi:5804  | 515,04  | 13,09 | 772,52  | 8,73   | 1,5   | 1,43  | 1,57  | 257,48   | * |
| 230629_s_at  | E1A binding protein p400                        | AI809582  | 57634          | gb:AI809582 /DB_XREF=gi:5396  | 388,43  | 8,59  | 584,39  | 5,71   | 1,5   | 1,45  | 1,57  | 195,96   | * |
| 221705_s_at  | hypothetical protein FLJ21168 /// hypotheti     | BC005934  | 80143          | gb:BC005934.1 /DB_XREF=gi:13  | 208,31  | 3,37  | 312,27  | 2,25   | 1,5   | 1,46  | 1,54  | 103,95   | * |
| 221789_x_at  | ras homolog gene family, member T2              | AK024450  | 89941          | gb:AK024450.1 /DB_XREF=gi:10  | 225,48  | 4,87  | 337,62  | 3,25   | 1,5   | 1,44  | 1,56  | 112,14   | * |
| 213865_at    | discoidin, CUB and LCCL domain containing       | AI378788  | 131566         | gb:AI378788 /DB_XREF=gi:4188  | 726,47  | 11,44 | 1086,3  | 7,65   | 1,5   | 1,45  | 1,54  | 359,83   | * |
| 222252_x_at  | gb:AK023354.1 /DB_XREF=gi:10435253 /FE/         | AK023354  |                | gb:AK023354.1 /DB_XREF=gi:10  | 1534,24 | 19,06 | 2299,3  | 12,71  | 1,5   | 1,47  | 1,53  | 765,06   | * |
| 203311_s_at  | ADP-ribosylation factor 6                       | M57763    | 382            | gb:M57763.1 /DB_XREF=gi:1789  | 1011,7  | 19,35 | 675,38  | 28,99  | -1,5  | -1,39 | -1,62 | -336,32  | * |
| 214893_x_at  | hyperpolarization activated cyclic nucleotide   | AI421964  | 610            | gb:AI421964 /DB_XREF=gi:4267  | 392,36  | 0,72  | 262     | 1,07   | -1,5  | -1,49 | -1,51 | -130,36  | * |
| 1555730_a_at | cofilin 1 (non-muscle)                          | D00682    | 1072           | gb:D00682.1 /DB_XREF=gi:2195  | 2500,76 | 16,7  | 1669,67 | 25,02  | -1,5  | -1,46 | -1,54 | -831,1   | * |
| 206635_at    | cholinergic receptor, nicotinic, beta polypep   | NM_000748 | 1141           | gb:NM_000748.1 /DB_XREF=gi:4  | 374,11  | 4,5   | 248,72  | 6,77   | -1,5  | -1,43 | -1,58 | -125,39  | * |
| 206284_x_at  | clathrin, light polypeptide (Lcb)               | NM_001834 | 1212           | gb:NM_001834.1 /DB_XREF=gi:4  | 1108,93 | 22,96 | 740,9   | 34,37  | -1,5  | -1,38 | -1,63 | -368,03  | * |
| 209126_x_at  | keratin 6B                                      | L42612    | 3854           | gb:L42612.1 /DB_XREF=gi:9088  | 4167,88 | 22,43 | 2774,85 | 33,69  | -1,5  | -1,47 | -1,54 | -1393,03 | * |
| 204734_at    | keratin 15                                      | NM_002275 | 3866           | gb:NM_002275.1 /DB_XREF=gi:4  | 6447,3  | 72,12 | 4305,98 | 107,98 | -1,5  | -1,43 | -1,57 | -2141,32 | * |
| 227312_at    | Syntrophin, beta 2 (dystrophin-associated p     | AI694536  | 6645           | gb:AI694536 /DB_XREF=gi:4971  | 538,57  | 11,47 | 359,57  | 17,19  | -1,5  | -1,38 | -1,64 | -179     | * |
| 202658_at    | peroxisomal biogenesis factor 11B               | NM_003846 | 8799           | gb:NM_003846.1 /DB_XREF=gi:4  | 738,5   | 15,83 | 491,14  | 23,8   | -1,5  | -1,38 | -1,65 | -247,37  | * |
| 236416_at    | Rho guanine nucleotide exchange factor (GE      | AI681617  | 8874           | gb:AI681617 /DB_XREF=gi:4891  | 362,25  | 0,75  | 241,74  | 1,12   | -1,5  | -1,49 | -1,51 | -120,51  | * |
| 1554148_a_at | solute carrier family 33 (acetyl-CoA transpor   | BC014416  | 9197           | gb:BC014416.1 /DB_XREF=gi:15  | 630,5   | 10,16 | 420,77  | 15,23  | -1,5  | -1,41 | -1,6  | -209,73  | * |
| 210288_at    | killer cell lectin-like receptor subfamily G, m | AF081675  | 10219          | gb:AF081675.1 /DB_XREF=gi:34  | 998,23  | 2,42  | 667,7   | 3,62   | -1,5  | -1,48 | -1,51 | -330,53  | * |
| 218388_at    | 6-phosphogluconolactonase                       | NM_012088 | 25796          | gb:NM_012088.1 /DB_XREF=gi:6  | 898,04  | 16,77 | 600,32  | 25,09  | -1,5  | -1,39 | -1,62 | -297,72  | * |
| 224582_s_at  | Nuclear ubiquitous casein kinase and cyclin-    | H09085    | 64710          | gb:H09085 /DB_XREF=gi:873907  | 1120,91 | 11,44 | 745,92  | 17,2   | -1,5  | -1,44 | -1,57 | -374,99  | * |
| 221477_s_at  | hypothetical protein MGC5618                    | BF575213  | 79099          | gb:BF575213 /DB_XREF=gi:1164  | 2647,62 | 5,75  | 1764,44 | 8,63   | -1,5  | -1,49 | -1,51 | -883,18  | * |
| 233380_s_at  | RUN and FYVE domain containing 1                | AA429145  | 80230          | gb:AA429145 /DB_XREF=gi:211   | 425,54  | 5,5   | 283,97  | 8,25   | -1,5  | -1,42 | -1,58 | -141,58  | * |
| 222278_at    | hypothetical LOC389393                          | AW969655  | 389393         | gb:AW969655 /DB_XREF=gi:815   | 407,61  | 0,83  | 270,91  | 1,25   | -1,5  | -1,49 | -1,52 | -136,7   | * |
| 237355_at    | Similar to Zgc:85944 protein                    | AW448981  | 390468         | gb:AW448981 /DB_XREF=gi:698   | 322,49  | 0,89  | 214,99  | 1,33   | -1,5  | -1,48 | -1,52 | -107,5   | * |
| 202576_s_at  | DEAD (Asp-Glu-Ala-As) box polypeptide 19 /      | AL553254  | /// 544314 /// | gb:AL553254 /DB_XREF=gi:1289  | 1748,77 | 12,15 | 1167,34 | 18,2   | -1,5  | -1,46 | -1,54 | -581,43  | * |
| 228168_at    | ATP synthase, H+ transporting, mitochondri      | AU153583  | 518            | gb:AU153583 /DB_XREF=gi:110   | 403,21  | 8,59  | 266,86  | 12,98  | -1,51 | -1,39 | -1,65 | -136,35  | * |
| 201971_s_at  | ATPase, H+ transporting, lysosomal 70kDa, v     | NM_001690 | 523            | gb:NM_001690.1 /DB_XREF=gi:4  | 498,31  | 17,33 | 330,24  | 26,15  | -1,51 | -1,32 | -1,75 | -168,07  | * |
| 205595_at    | desmoglein 3 (pemphigus vulgaris antigen)       | NM_001944 | 1830           | gb:NM_001944.1 /DB_XREF=gi:4  | 857,89  | 11,06 | 566,28  | 16,75  | -1,51 | -1,44 | -1,6  | -291,61  | * |
| 202363_at    | sparc/osteonectin, cwcv and kazal-like dom      | AF231124  | 6695           | gb:AF231124.1 /DB_XREF=gi:72  | 629,7   | 6,38  | 417,89  | 9,62   | -1,51 | -1,45 | -1,57 | -211,81  | * |
| 1558254_s_at | SFRS protein kinase 2                           | BU155802  | 6733           | gb:BU155802 /DB_XREF=gi:226   | 340,78  | 4,6   | 225,78  | 6,95   | -1,51 | -1,43 | -1,6  | -115,01  | * |
| 219924_s_at  | zinc finger protein 258                         | NM_007167 | 9204           | gb:NM_007167.1 /DB_XREF=gi:6  | 889,09  | 10,59 | 589,02  | 15,99  | -1,51 | -1,44 | -1,59 | -300,07  | * |
| 214553_s_at  | cyclic AMP phosphoprotein, 19 kD                | NM_006628 | 10776          | gb:NM_006628.1 /DB_XREF=gi:5  | 478,5   | 9,99  | 317,79  | 15,04  | -1,51 | -1,39 | -1,64 | -160,71  | * |
| 231771_at    | gap junction protein, beta 6 (connexin 30)      | AI694073  | 10804          | gb:AI694073 /DB_XREF=gi:4971  | 496,33  | 2,05  | 329,16  | 3,1    | -1,51 | -1,48 | -1,53 | -167,17  | * |
| 213935_at    | abhydrolase domain containing 5                 | AF007132  | 51099          | gb:AF007132.1 /DB_XREF=gi:28  | 323,92  | 3,74  | 214,01  | 5,65   | -1,51 | -1,44 | -1,59 | -109,9   | * |
| 222531_s_at  | chromosome 14 open reading frame 108            | AW137526  | 55745          | gb:AW137526 /DB_XREF=gi:614   | 1430,28 | 34,47 | 947,89  | 52,01  | -1,51 | -1,37 | -1,67 | -482,39  | * |

|              |                                                  |           |        |                               |          |       |         |        |       |       |       |          |   |
|--------------|--------------------------------------------------|-----------|--------|-------------------------------|----------|-------|---------|--------|-------|-------|-------|----------|---|
| 218752_at    | U11/U12 snRNP 20K                                | NM_019103 | 55954  | gb:NM_019103.1 /DB_XREF=gi:5  | 517,18   | 8,24  | 342,99  | 12,42  | -1,51 | -1,41 | -1,61 | -174,19  | * |
| 223735_at    | ADP-ribosylation factor-like 6                   | AL136815  | 84100  | gb:AL136815.1 /DB_XREF=gi:120 | 384,04   | 4,05  | 255,07  | 6,1    | -1,51 | -1,44 | -1,57 | -128,98  | * |
| 227835_at    | Hypothetical gene supported by AL713796          | T86830    | 389831 | gb:T86830 /DB_XREF=gi:715182  | 389,11   | 6,93  | 256,97  | 10,5   | -1,51 | -1,41 | -1,63 | -132,14  | * |
| 204645_at    | cyclin T2                                        | NM_001241 | 905    | gb:NM_001241.1 /DB_XREF=gi:4  | 391,79   | 10,54 | 258,42  | 15,98  | -1,52 | -1,36 | -1,7  | -133,37  | * |
| 204305_at    | mitochondrial intermediate peptidase             | NM_005932 | 4285   | gb:NM_005932.1 /DB_XREF=gi:5  | 763,09   | 27,2  | 502,25  | 41,32  | -1,52 | -1,32 | -1,78 | -260,83  | * |
| 213465_s_at  | protein phosphatase 1, regulatory subunit 7      | BF718769  | 5510   | gb:BF718769 /DB_XREF=gi:1201  | 1602,18  | 6,09  | 1051,2  | 9,29   | -1,52 | -1,5  | -1,55 | -550,98  | * |
| 216899_s_at  | src family associated phosphoprotein 2           | AC003999  | 8935   | gb:AC003999 /DB_XREF=gi:2772  | 407,77   | 4,74  | 268,2   | 7,2    | -1,52 | -1,45 | -1,6  | -139,57  | * |
| 210852_s_at  | aminoadipate-semialdehyde synthase               | AF229180  | 10157  | gb:AF229180.1 /DB_XREF=gi:720 | 363,49   | 5,7   | 238,99  | 8,66   | -1,52 | -1,43 | -1,63 | -124,5   | * |
| 201264_at    | coatamer protein complex, subunit epsilon        | NM_007263 | 11316  | gb:NM_007263.1 /DB_XREF=gi:6  | 396,64   | 9     | 260,3   | 13,72  | -1,52 | -1,39 | -1,68 | -136,34  | * |
| 214449_s_at  | ras homolog gene family, member Q                | NM_012249 | 23433  | gb:NM_012249.1 /DB_XREF=gi:6  | 607,36   | 8,07  | 400,75  | 12,23  | -1,52 | -1,44 | -1,6  | -206,61  | * |
| 214581_x_at  | tumor necrosis factor receptor superfamily,      | BE568134  | 27242  | gb:BE568134 /DB_XREF=gi:9811  | 566,61   | 3,4   | 371,89  | 5,18   | -1,52 | -1,49 | -1,56 | -194,72  | * |
| 212032_s_at  | prostate tumor overexpressed gene 1              | AL046054  | 53635  | gb:AL046054 /DB_XREF=gi:5936  | 542,77   | 7,59  | 357,53  | 11,52  | -1,52 | -1,43 | -1,61 | -185,24  | * |
| 221781_s_at  | DnaJ (Hsp40) homolog, subfamily C, membe         | BG168666  | 54431  | gb:BG168666 /DB_XREF=gi:1267  | 614,5    | 6,47  | 403,21  | 9,85   | -1,52 | -1,46 | -1,59 | -211,29  | * |
| 228397_at    | Hypothetical protein FLJ20618                    | AW082208  | 55000  | gb:AW082208 /DB_XREF=gi:603   | 377,18   | 5,09  | 248,51  | 7,72   | -1,52 | -1,44 | -1,61 | -128,68  | * |
| 230943_at    | SRY (sex determining region Y)-box 17            | AI821669  | 64321  | gb:AI821669 /DB_XREF=gi:5440  | 297,66   | 2,24  | 196,11  | 3,4    | -1,52 | -1,47 | -1,57 | -101,55  | * |
| 228536_at    | hypothetical protein BC004337                    | AA574240  | 90826  | gb:AA574240 /DB_XREF=gi:2348  | 385,53   | 4,36  | 253     | 6,64   | -1,52 | -1,45 | -1,6  | -132,53  | * |
| 203442_x_at  | hypothetical protein FLJ35827                    | AA478965  | 256364 | gb:AA478965 /DB_XREF=gi:2207  | 448,3    | 5,07  | 295,37  | 7,7    | -1,52 | -1,45 | -1,59 | -152,93  | * |
| 225062_at    | hypothetical gene supported by AL713796          | BF667120  | 389831 | gb:BF667120 /DB_XREF=gi:1194  | 595,34   | 9,89  | 392,77  | 14,99  | -1,52 | -1,42 | -1,63 | -202,57  | * |
| 231975_s_at  | gb:AK002183.1 /DB_XREF=gi:7023905 /FEA:          | AK002183  |        | gb:AK002183.1 /DB_XREF=gi:70  | 369,96   | 5,66  | 243,86  | 8,59   | -1,52 | -1,43 | -1,62 | -126,09  | * |
| 214578_s_at  | gb:AV683882 /DB_XREF=gi:10285745 /DB_)           | AV683882  |        | gb:AV683882 /DB_XREF=gi:1028  | 1412,66  | 20,38 | 927,65  | 31,04  | -1,52 | -1,44 | -1,62 | -485,01  | * |
| 1553551_s_at | gb:NM_173709.1 /DB_XREF=gi:27754201 /C           | NM_173709 |        | gb:NM_173709.1 /DB_XREF=gi:2  | 10209,61 | 88,49 | 6725,65 | 134,33 | -1,52 | -1,47 | -1,57 | -3483,96 | * |
| 201850_at    | capping protein (actin filament), gelsolin-like  | NM_001747 | 822    | gb:NM_001747.1 /DB_XREF=gi:4  | 1600,5   | 21,89 | 1046,43 | 33,48  | -1,53 | -1,45 | -1,62 | -554,07  | * |
| 213581_at    | programmed cell death 2                          | BF446180  | 5134   | gb:BF446180 /DB_XREF=gi:1151  | 1115,84  | 13,28 | 727,07  | 20,38  | -1,53 | -1,46 | -1,61 | -388,77  | * |
| 203329_at    | protein tyrosine phosphatase, receptor type      | NM_002845 | 5797   | gb:NM_002845.1 /DB_XREF=gi:4  | 355,01   | 2,54  | 231,61  | 3,89   | -1,53 | -1,49 | -1,58 | -123,4   | * |
| 227164_at    | Splicing factor, arginine/serine-rich 1 (splicir | AL521786  | 6426   | gb:AL521786 /DB_XREF=gi:1278  | 504,96   | 1,57  | 329,75  | 2,41   | -1,53 | -1,51 | -1,55 | -175,2   | * |
| 214168_s_at  | tight junction protein 1 (zona occludens 1)      | AA813018  | 7082   | gb:AA813018 /DB_XREF=gi:2883  | 599,37   | 12,31 | 392,13  | 18,82  | -1,53 | -1,41 | -1,67 | -207,24  | * |
| 226268_at    | RAB21, member RAS oncogene family                | AI309554  | 23011  | gb:AI309554 /DB_XREF=gi:4004  | 521,75   | 5,5   | 341,88  | 8,4    | -1,53 | -1,46 | -1,6  | -179,87  | * |
| 219201_s_at  | twisted gastrulation homolog 1 (Drosophila)      | NM_020648 | 57045  | gb:NM_020648.1 /DB_XREF=gi:1  | 477,13   | 6,97  | 312,44  | 10,65  | -1,53 | -1,44 | -1,63 | -164,69  | * |
| 231867_at    | odz, odd Oz/ten-m homolog 2 (Drosophila)         | AB032953  | 57451  | gb:AB032953.1 /DB_XREF=gi:63  | 678,48   | 10,79 | 442,05  | 16,56  | -1,53 | -1,44 | -1,64 | -236,42  | * |
| 219469_at    | dynein, cytoplasmic, heavy polypeptide 2         | NM_024606 | 79659  | gb:NM_024606.1 /DB_XREF=gi:1  | 599,28   | 8,93  | 391,2   | 13,69  | -1,53 | -1,44 | -1,63 | -208,09  | * |
| 226506_at    | hypothetical protein FLJ13710                    | AI742570  | 79875  | gb:AI742570 /DB_XREF=gi:5110  | 329,16   | 8,22  | 214,91  | 12,58  | -1,53 | -1,38 | -1,71 | -114,25  | * |
| 238863_x_at  | Transcribed locus, weakly similar to NP_055      | AI524240  |        | gb:AI524240 /DB_XREF=gi:4438  | 758,01   | 6,94  | 495,23  | 10,62  | -1,53 | -1,47 | -1,59 | -262,78  | * |
| 209275_s_at  | ceroid-lipofuscinosis, neuronal 3, juvenile (B   | AF015593  | 1201   | gb:AF015593.1 /DB_XREF=gi:410 | 290,41   | 4,5   | 188,43  | 6,93   | -1,54 | -1,45 | -1,65 | -101,99  | * |
| 242363_at    | Dynein, cytoplasmic, intermediate polypept       | BF592008  | 1781   | gb:BF592008 /DB_XREF=gi:1168  | 580,55   | 21,22 | 375,77  | 32,78  | -1,54 | -1,33 | -1,82 | -204,79  | * |
| 205770_at    | glutathione reductase                            | NM_000637 | 2936   | gb:NM_000637.1 /DB_XREF=gi:1  | 811,68   | 10,38 | 526,54  | 16,01  | -1,54 | -1,46 | -1,63 | -285,14  | * |
| 214359_s_at  | heat shock 90kDa protein 1, beta                 | AI218219  | 3326   | gb:AI218219 /DB_XREF=gi:3798  | 2823,84  | 30,58 | 1836,02 | 47,04  | -1,54 | -1,47 | -1,61 | -987,82  | * |
| 213680_at    | keratin 6B                                       | AI831452  | 3854   | gb:AI831452 /DB_XREF=gi:5452  | 880,63   | 10,29 | 573,03  | 15,82  | -1,54 | -1,46 | -1,62 | -307,6   | * |
| 203466_at    | MpV17 transgene, murine homolog, glomer          | NM_002437 | 4358   | gb:NM_002437.1 /DB_XREF=gi:4  | 677,44   | 7,46  | 440,31  | 11,48  | -1,54 | -1,47 | -1,61 | -237,13  | * |
| 217457_s_at  | RAP1, GTP-GDP dissociation stimulator 1          | X63465    | 5910   | gb:X63465.1 /DB_XREF=gi:3207  | 773,84   | 1,47  | 501,95  | 2,27   | -1,54 | -1,53 | -1,55 | -271,89  | * |
| 201006_at    | peroxiredoxin 2                                  | NM_005809 | 7001   | gb:NM_005809.1 /DB_XREF=gi:5  | 548,59   | 4,7   | 356,49  | 7,24   | -1,54 | -1,48 | -1,6  | -192,09  | * |
| 212041_at    | ATPase, H+ transporting, lysosomal 38kDa, \      | AL566172  | 9114   | gb:AL566172 /DB_XREF=gi:1291  | 1296,04  | 26,56 | 843,8   | 40,8   | -1,54 | -1,41 | -1,68 | -452,25  | * |
| 217847_s_at  | thyroid hormone receptor associated protei       | NM_005119 | 9967   | gb:NM_005119.1 /DB_XREF=gi:4  | 380,11   | 5,99  | 246,61  | 9,24   | -1,54 | -1,44 | -1,65 | -133,49  | * |
| 216071_x_at  | mediator of RNA polymerase II transcripior       | AF132033  | 9968   | gb:AF132033 /DB_XREF=gi:5524  | 1659,53  | 5,91  | 1076,25 | 9,11   | -1,54 | -1,52 | -1,57 | -583,27  | * |
| 202955_s_at  | ADP-ribosylation factor guanine nucleotide-      | AF084520  | 10565  | gb:AF084520.1 /DB_XREF=gi:50  | 337,03   | 1,79  | 218,63  | 2,76   | -1,54 | -1,51 | -1,58 | -118,4   | * |
| 217188_s_at  | chromosome 14 open reading frame 1               | AC007182  | 11161  | gb:AC007182 /DB_XREF=gi:5708  | 687,55   | 8,96  | 447,24  | 13,77  | -1,54 | -1,46 | -1,63 | -240,31  | * |
| 222478_at    | chromosome 13 open reading frame 9               | AL576924  | 51028  | gb:AL576924 /DB_XREF=gi:1293  | 1214,1   | 13,73 | 786,01  | 21,21  | -1,54 | -1,47 | -1,62 | -428,09  | * |
| 226888_at    | Casein kinase 1, gamma 1                         | BG104860  | 53944  | gb:BG104860 /DB_XREF=gi:125   | 564,99   | 9,67  | 366,12  | 14,92  | -1,54 | -1,44 | -1,66 | -198,86  | * |
| 218437_s_at  | leucine zipper transcription factor-like 1       | NM_020347 | 54585  | gb:NM_020347.1 /DB_XREF=gi:5  | 299,84   | 1,5   | 194,63  | 2,31   | -1,54 | -1,51 | -1,57 | -105,21  | * |
| 219527_at    | hypothetical protein FLJ20605                    | NM_017898 | 54996  | gb:NM_017898.1 /DB_XREF=gi:8  | 293,97   | 3,34  | 191,51  | 5,12   | -1,54 | -1,46 | -1,61 | -102,47  | * |
| 1554679_a_at | lysosomal associated protein transmembran        | AF317417  | 55353  | gb:AF317417.1 /DB_XREF=gi:14  | 981,94   | 15,97 | 638,04  | 24,57  | -1,54 | -1,44 | -1,65 | -343,91  | * |



|              |                                                |           |                |                              |          |        |          |        |       |       |       |          |   |
|--------------|------------------------------------------------|-----------|----------------|------------------------------|----------|--------|----------|--------|-------|-------|-------|----------|---|
| 218584_at    | hypothetical protein FLJ21127                  | NM_024549 | 79600          | gb:NM_024549.1 /DB_XREF=gi:1 | 380,62   | 5,36   | 246,47   | 8,28   | -1,54 | -1,46 | -1,64 | -134,15  | * |
| 234945_at    | family with sequence similarity 54, member     | AL138828  | 113115         | gb:AL138828 /DB_XREF=gi:1044 | 379,91   | 4,34   | 247,41   | 6,66   | -1,54 | -1,46 | -1,61 | -132,5   | * |
| 225328_at    | F-box protein 32                               | N21643    | 114907         | gb:N21643 /DB_XREF=gi:112681 | 344,57   | 1,05   | 224,38   | 1,61   | -1,54 | -1,52 | -1,56 | -120,19  | * |
| 227270_at    | hypothetical protein LOC285550                 | BF593037  | 285550         | gb:BF593037 /DB_XREF=gi:1168 | 354,65   | 4,58   | 229,95   | 7,06   | -1,54 | -1,46 | -1,63 | -124,7   | * |
| 238656_at    | Transcribed locus, strongly similar to XP_51   | AA877043  |                | gb:AA877043 /DB_XREF=gi:2986 | 325,59   | 7,53   | 211,86   | 11,58  | -1,54 | -1,4  | -1,7  | -113,73  | * |
| 211558_s_at  | deoxyhypusine synthase                         | U26266    | 1725           | gb:U26266.1 /DB_XREF=gi:1373 | 297,17   | 7,11   | 191,16   | 11,06  | -1,55 | -1,41 | -1,73 | -106,01  | * |
| 210233_at    | interleukin 1 receptor accessory protein       | AF167343  | 3556           | gb:AF167343.1 /DB_XREF=gi:80 | 328,29   | 6,17   | 212,43   | 9,53   | -1,55 | -1,43 | -1,68 | -115,85  | * |
| 201234_at    | integrin-linked kinase                         | NM_004517 | 3611           | gb:NM_004517.1 /DB_XREF=gi:4 | 847,8    | 12,04  | 548,32   | 18,62  | -1,55 | -1,46 | -1,64 | -299,48  | * |
| 206544_x_at  | SWI/SNF related, matrix associated, actin de   | NM_003070 | 6595           | gb:NM_003070.1 /DB_XREF=gi:4 | 607,64   | 6,38   | 391,37   | 9,91   | -1,55 | -1,49 | -1,63 | -216,27  | * |
| 216697_at    | Triple functional domain (PTPRF interacting)   | AL161955  | 7204           | gb:AL161955.1 /DB_XREF=gi:73 | 1022,7   | 1,54   | 660,24   | 2,39   | -1,55 | -1,54 | -1,56 | -362,46  | * |
| 217799_x_at  | ubiquitin-conjugating enzyme E2H (UBC8 hc      | NM_003344 | 7328           | gb:NM_003344.1 /DB_XREF=gi:4 | 1629,11  | 25,51  | 1050,68  | 39,55  | -1,55 | -1,45 | -1,66 | -578,42  | * |
| 211238_at    | a disintegrin and metalloproteinase domain     | AF215824  | 8756           | gb:AF215824.1 /DB_XREF=gi:12 | 1762,71  | 5,85   | 1140,49  | 9,04   | -1,55 | -1,52 | -1,57 | -622,22  | * |
| 203404_at    | armadillo repeat containing, X-linked 2        | NM_014782 | 9823           | gb:NM_014782.1 /DB_XREF=gi:7 | 363,7    | 4,24   | 235,06   | 6,57   | -1,55 | -1,47 | -1,63 | -128,64  | * |
| 1554352_s_at | c-myc promoter binding protein                 | BC041706  | 10260          | gb:BC041706.1 /DB_XREF=gi:27 | 492,38   | 5,31   | 316,91   | 8,26   | -1,55 | -1,48 | -1,63 | -175,47  | * |
| 202784_s_at  | nicotinamide nucleotide transhydrogenase       | NM_012343 | 23530          | gb:NM_012343.1 /DB_XREF=gi:6 | 605,3    | 5,15   | 389,8    | 7,99   | -1,55 | -1,5  | -1,61 | -215,49  | * |
| 218036_x_at  | NMD3 homolog (S. cerevisiae)                   | NM_015938 | 51068          | gb:NM_015938.1 /DB_XREF=gi:7 | 941,35   | 18,44  | 606,5    | 28,62  | -1,55 | -1,43 | -1,69 | -334,84  | * |
| 211376_s_at  | chromosome 10 open reading frame 86            | BC005212  | 54780          | gb:BC005212.1 /DB_XREF=gi:13 | 1214,43  | 29,66  | 784,22   | 45,93  | -1,55 | -1,4  | -1,73 | -430,21  | * |
| 224373_s_at  | 6-pyruvoyl-tetrahydropterin synthase/dime      | AF253979  | 84105          | gb:AF253979.1 /DB_XREF=gi:12 | 16477,91 | 148,17 | 10602,71 | 230,28 | -1,55 | -1,5  | -1,62 | -5875,2  | * |
| 1556429_a_at | unknown MGC21654 product                       | BC026969  | 93594          | gb:BC026969.1 /DB_XREF=gi:20 | 309,64   | 4,65   | 199,28   | 7,23   | -1,55 | -1,46 | -1,66 | -110,36  | * |
| 227119_at    | CCR4-NOT transcription complex, subunit 6-     | BF103856  | 246175         | gb:BF103856 /DB_XREF=gi:1088 | 393,01   | 4,84   | 253,34   | 7,5    | -1,55 | -1,47 | -1,64 | -139,67  | * |
| 212969_x_at  | hypothetical protein FLJ35827                  | BE222618  | 256364         | gb:BE222618 /DB_XREF=gi:8909 | 434,33   | 3,88   | 279,7    | 6,03   | -1,55 | -1,5  | -1,61 | -154,63  | * |
| 223443_s_at  | hypothetical protein LOC51321 /// hypothe      | BC003669  | 11283 /// 5132 | gb:BC003669.1 /DB_XREF=gi:13 | 560,48   | 4,06   | 362,26   | 6,29   | -1,55 | -1,5  | -1,6  | -198,22  | * |
| 216383_at    | ribosomal protein L18a /// similar to ribosoi  | U52111    | 47544 /// 614  | gb:U52111 /DB_XREF=gi:833175 | 465,48   | 7,2    | 299,95   | 11,17  | -1,55 | -1,45 | -1,66 | -165,53  | * |
| 205750_at    | biphenyl hydrolase-like (serine hydrolase; bi  | NM_004332 | 670            | gb:NM_004332.1 /DB_XREF=gi:4 | 681,1    | 18,76  | 435,65   | 29,34  | -1,56 | -1,39 | -1,77 | -245,46  | * |
| 205196_s_at  | adaptor-related protein complex 1, sigma 1     | NM_001283 | 1174           | gb:NM_001283.1 /DB_XREF=gi:4 | 633,26   | 11,69  | 406,33   | 18,22  | -1,56 | -1,44 | -1,69 | -226,93  | * |
| 227677_at    | Janus kinase 3 (a protein tyrosine kinase, leu | BF512748  | 3718           | gb:BF512748 /DB_XREF=gi:1159 | 522,59   | 3,83   | 335,21   | 5,97   | -1,56 | -1,51 | -1,61 | -187,38  | * |
| 210102_at    | loss of heterozygosity, 11, chromosomal reg    | BC001234  | 4013           | gb:BC001234.1 /DB_XREF=gi:12 | 493,11   | 10,61  | 315,94   | 16,57  | -1,56 | -1,43 | -1,72 | -177,17  | * |
| 212016_s_at  | polypyrimidine tract binding protein 1         | AA679988  | 5725           | gb:AA679988 /DB_XREF=gi:2656 | 484,39   | 3,65   | 311,22   | 5,69   | -1,56 | -1,51 | -1,61 | -173,16  | * |
| 211536_x_at  | mitogen-activated protein kinase kinase kin    | AB009358  | 6885           | gb:AB009358.2 /DB_XREF=gi:89 | 340,12   | 10,63  | 217,87   | 16,59  | -1,56 | -1,37 | -1,8  | -122,25  | * |
| 242879_x_at  | V-akt murine thymoma viral oncogene hom        | AI939442  | 10000          | gb:AI939442 /DB_XREF=gi:5678 | 302,34   | 3,78   | 193,93   | 5,9    | -1,56 | -1,48 | -1,65 | -108,42  | * |
| 230926_s_at  | KIAA1229 protein                               | AW452022  | 57489          | gb:AW452022 /DB_XREF=gi:699  | 308,04   | 3,69   | 197,42   | 5,76   | -1,56 | -1,48 | -1,65 | -110,62  | * |
| 225631_at    | KIAA1706 protein                               | BE501865  | 80820          | gb:BE501865 /DB_XREF=gi:9704 | 494,59   | 3,7    | 317,21   | 5,77   | -1,56 | -1,51 | -1,61 | -177,38  | * |
| 1553929_at   | N-acylsphingosine amidohydrolase (alkaline     | NM_133492 | 125981         | gb:NM_133492.1 /DB_XREF=gi:1 | 1737,15  | 4,07   | 1114,84  | 6,35   | -1,56 | -1,54 | -1,57 | -622,31  | * |
| 208596_s_at  | UDP glycosyltransferase 1 family, polypeptic   | NM_019093 | /// 54579 ///  | gb:NM_019093.1 /DB_XREF=gi:1 | 436,2    | 13     | 279,2    | 20,3   | -1,56 | -1,38 | -1,79 | -157     | * |
| 206042_x_at  | small nuclear ribonucleoprotein polypeptide    | NM_022804 | 6638 /// 8926  | gb:NM_022804.1 /DB_XREF=gi:1 | 722,59   | 9,99   | 463,29   | 15,59  | -1,56 | -1,47 | -1,66 | -259,3   | * |
| 239973_at    | Full-length cDNA clone CS0DJ013YE21 of T c     | AW450675  |                | gb:AW450675 /DB_XREF=gi:699  | 466,75   | 2,07   | 298,67   | 3,23   | -1,56 | -1,53 | -1,59 | -168,08  | * |
| 1555852_at   | gb:AI375915 /DB_XREF=gi:4175905 /DB_XR         | AI375915  |                | gb:AI375915 /DB_XREF=gi:4175 | 383,31   | 6,08   | 245,87   | 9,49   | -1,56 | -1,46 | -1,67 | -137,44  | * |
| 215719_x_at  | Fas (TNF receptor superfamily, member 6)       | X83493    | 355            | gb:X83493.1 /DB_XREF=gi:9714 | 852,85   | 3,91   | 544,57   | 6,13   | -1,57 | -1,54 | -1,6  | -308,28  | * |
| 225805_at    | Heterogeneous nuclear ribonucleoprotein L      | AW137669  | 3192           | gb:AW137669 /DB_XREF=gi:614  | 625,69   | 10,61  | 398,83   | 16,64  | -1,57 | -1,46 | -1,69 | -226,85  | * |
| 201604_s_at  | protein phosphatase 1, regulatory (inhibitor   | NM_002480 | 4659           | gb:NM_002480.1 /DB_XREF=gi:4 | 1446,95  | 10,4   | 922,04   | 16,33  | -1,57 | -1,52 | -1,62 | -524,91  | * |
| 218129_s_at  | nuclear transcription factor Y, beta           | NM_006166 | 4801           | gb:NM_006166.2 /DB_XREF=gi:1 | 751,03   | 15,48  | 477,56   | 24,35  | -1,57 | -1,44 | -1,73 | -273,46  | * |
| 217356_s_at  | phosphoglycerate kinase 1                      | S81916    | 5230           | gb:S81916.1 /DB_XREF=gi:1470 | 5680,24  | 24,07  | 3623,67  | 37,72  | -1,57 | -1,54 | -1,6  | -2056,56 | * |
| 216175_at    | Polymerase (DNA directed), delta 2, regulat    | AK025276  | 5425           | gb:AK025276.1 /DB_XREF=gi:10 | 276,3    | 1,61   | 176,2    | 2,53   | -1,57 | -1,53 | -1,61 | -100,1   | * |
| 203210_s_at  | replication factor C (activator 1) 5, 36.5kDa  | NM_007370 | 5985           | gb:NM_007370.1 /DB_XREF=gi:6 | 544,19   | 12,62  | 345,86   | 19,85  | -1,57 | -1,43 | -1,75 | -198,33  | * |
| 210372_s_at  | tumor protein D52-like 1                       | AF208012  | 7164           | gb:AF208012.1 /DB_XREF=gi:12 | 896,02   | 16,45  | 569,29   | 25,89  | -1,57 | -1,46 | -1,71 | -326,73  | * |
| 201813_s_at  | TBC1 domain family, member 5                   | AI654161  | 9779           | gb:AI654161 /DB_XREF=gi:4738 | 399,14   | 7,09   | 254,45   | 11,13  | -1,57 | -1,45 | -1,7  | -144,7   | * |
| 209316_s_at  | HBS1-like (S. cerevisiae)                      | BC001465  | 10767          | gb:BC001465.1 /DB_XREF=gi:12 | 2448,85  | 15,61  | 1562,14  | 24,47  | -1,57 | -1,53 | -1,61 | -886,71  | * |
| 223400_s_at  | polybromo 1                                    | AF197569  | 55193          | gb:AF197569.1 /DB_XREF=gi:11 | 305,11   | 6,53   | 193,79   | 10,28  | -1,57 | -1,44 | -1,74 | -111,32  | * |
| 214941_s_at  | formin binding protein 3                       | AA675900  | 55660          | gb:AA675900 /DB_XREF=gi:2775 | 1282,77  | 12     | 817,43   | 18,83  | -1,57 | -1,51 | -1,64 | -465,33  | * |
| 213312_at    | chromosome 6 open reading frame 162            | NM_020425 | 57150          | gb:NM_020425.1 /DB_XREF=gi:1 | 451,86   | 11,74  | 287,57   | 18,45  | -1,57 | -1,41 | -1,77 | -164,28  | * |

|              |                                                 |           |           |                               |         |       |         |        |       |       |       |          |   |
|--------------|-------------------------------------------------|-----------|-----------|-------------------------------|---------|-------|---------|--------|-------|-------|-------|----------|---|
| 228429_x_at  | kinesin family member 9                         | BG168764  | 64147     | gb:BG168764 /DB_XREF=gi:1267  | 478,54  | 2,61  | 305,02  | 4,1    | -1,57 | -1,53 | -1,61 | -173,51  | * |
| 1553708_at   | hypothetical protein MGC16075                   | NM_032761 | 84847     | gb:NM_032761.1 /DB_XREF=gi:1  | 495,92  | 9,24  | 315,63  | 14,52  | -1,57 | -1,45 | -1,71 | -180,29  | * |
| 1557055_s_at | hypothetical protein LOC284591                  | BC042880  | 284591    | gb:BC042880.1 /DB_XREF=gi:27! | 700,67  | 16,89 | 446,49  | 26,5   | -1,57 | -1,42 | -1,75 | -254,18  | * |
| 208229_at    | gb:NM_022975.1 /DB_XREF=gi:13186264 /C          | NM_022975 |           | gb:NM_022975.1 /DB_XREF=gi:1  | 287,59  | 3,54  | 183,24  | 5,55   | -1,57 | -1,49 | -1,66 | -104,35  | * |
| 1554241_at   | coagulation factor C homolog, cochlin (Limu     | BC007230  | 1690      | gb:BC007230.1 /DB_XREF=gi:13! | 1275,38 | 8,18  | 809,06  | 12,89  | -1,58 | -1,53 | -1,62 | -466,32  | * |
| 207590_s_at  | FSH primary response (LRPR1 homolog, rat)       | NM_006733 | 2491      | gb:NM_006733.1 /DB_XREF=gi:!  | 593,65  | 6,52  | 375,11  | 10,32  | -1,58 | -1,51 | -1,66 | -218,54  | * |
| 204867_at    | GTP cyclohydrolase I feedback regulator         | NM_005258 | 2644      | gb:NM_005258.2 /DB_XREF=gi:!  | 287,78  | 1,3   | 181,58  | 2,06   | -1,58 | -1,55 | -1,62 | -106,2   | * |
| 205157_s_at  | keratin 17                                      | NM_000422 | 3872      | gb:NM_000422.1 /DB_XREF=gi:!  | 5296,25 | 84,63 | 3350    | 133,79 | -1,58 | -1,48 | -1,7  | -1946,25 | * |
| 212741_at    | monoamine oxidase A                             | AA923354  | 4128      | gb:AA923354 /DB_XREF=gi:307C  | 1687,9  | 14,09 | 1067,07 | 22,28  | -1,58 | -1,53 | -1,64 | -620,83  | * |
| 203226_s_at  | sarcoma amplified sequence                      | AL514076  | 6302      | gb:AL514076 /DB_XREF=gi:1277  | 459,92  | 11,81 | 291,97  | 18,6   | -1,58 | -1,41 | -1,77 | -167,95  | * |
| 201527_at    | ATPase, H+ transporting, lysosomal 14kDa, \     | NM_004231 | 9296      | gb:NM_004231.1 /DB_XREF=gi:!  | 1503,16 | 30,57 | 951,41  | 48,29  | -1,58 | -1,45 | -1,73 | -551,75  | * |
| 225294_s_at  | trafficking protein particle complex 1          | BG340967  | 58485     | gb:BG340967 /DB_XREF=gi:1314  | 324,82  | 10,77 | 205,15  | 17,05  | -1,58 | -1,38 | -1,85 | -119,68  | * |
| 221573_at    | chromosome 7 open reading frame 25              | BC000769  | 79020     | gb:BC000769.1 /DB_XREF=gi:12! | 281,59  | 5,11  | 178,58  | 8,06   | -1,58 | -1,46 | -1,71 | -103,01  | * |
| 222393_s_at  | Mak3 homolog (S. cerevisiae)                    | AU149868  | 80218     | gb:AU149868 /DB_XREF=gi:110!  | 2255,57 | 27,22 | 1424,4  | 43,1   | -1,58 | -1,5  | -1,67 | -831,17  | * |
| 1554489_a_at | p10-binding protein                             | BC016050  | 80321     | gb:BC016050.1 /DB_XREF=gi:16! | 860,23  | 12,86 | 544,11  | 20,33  | -1,58 | -1,48 | -1,69 | -316,13  | * |
| 1552486_s_at | lactamase, beta                                 | NM_171846 | 114294    | gb:NM_171846.1 /DB_XREF=gi:!  | 420,82  | 5,78  | 267,16  | 9,1    | -1,58 | -1,48 | -1,68 | -153,66  | * |
| 235433_at    | chromosome X open reading frame 33              | BG290639  | 139322    | gb:BG290639 /DB_XREF=gi:1304  | 373,47  | 6,82  | 236,23  | 10,78  | -1,58 | -1,46 | -1,72 | -137,24  | * |
| 208310_s_at  | chromosome 7 open reading frame 28A ///         | NM_007085 | 21960 /// | gb:NM_007085.1 /DB_XREF=gi:!  | 1505,04 | 18,46 | 952,3   | 29,18  | -1,58 | -1,5  | -1,67 | -552,73  | * |
| 209805_at    | PMS2 postmeiotic segregation increased 2 (      | U14658    | 41194 /// | gb:U14658.1 /DB_XREF=gi:5574! | 366,59  | 3,74  | 232,18  | 5,91   | -1,58 | -1,51 | -1,65 | -134,42  | * |
| 235917_at    | Transcribed locus                               | AI950319  |           | gb:AI950319 /DB_XREF=gi:5742! | 416,41  | 2,61  | 263,39  | 4,12   | -1,58 | -1,54 | -1,63 | -153,01  | * |
| 201122_x_at  | eukaryotic translation initiation factor 5A     | BC000751  | 1984      | gb:BC000751.1 /DB_XREF=gi:12! | 5180,79 | 34,01 | 3254,16 | 54,15  | -1,59 | -1,55 | -1,64 | -1926,63 | * |
| 210904_s_at  | interleukin 13 receptor, alpha 1                | U81380    | 3597      | gb:U81380.2 /DB_XREF=gi:5174  | 599,76  | 12,09 | 377,93  | 19,19  | -1,59 | -1,45 | -1,74 | -221,83  | * |
| 203417_at    | microfibrillar-associated protein 2             | NM_017459 | 4237      | gb:NM_017459.1 /DB_XREF=gi:!  | 594,64  | 5,12  | 374,19  | 8,13   | -1,59 | -1,53 | -1,65 | -220,46  | * |
| 201476_s_at  | ribonucleotide reductase M1 polypeptide         | AI692974  | 6240      | gb:AI692974 /DB_XREF=gi:4970: | 653,73  | 17,22 | 410,21  | 27,44  | -1,59 | -1,42 | -1,8  | -243,52  | * |
| 216591_s_at  | succinate dehydrogenase complex, subunit        | AF080579  | 6391      | gb:AF080579 /DB_XREF=gi:3406  | 1279,11 | 11,87 | 804,24  | 18,87  | -1,59 | -1,53 | -1,66 | -474,87  | * |
| 210317_s_at  | tyrosine 3-monooxygenase/tryptophan 5-m         | U28936    | 7531      | gb:U28936.1 /DB_XREF=gi:9843  | 610,12  | 6     | 383,8   | 9,54   | -1,59 | -1,52 | -1,66 | -226,33  | * |
| 216266_s_at  | ADP-ribosylation factor guanine nucleotide-     | AK025637  | 10565     | gb:AK025637.1 /DB_XREF=gi:10! | 478,38  | 6,67  | 300,38  | 10,62  | -1,59 | -1,5  | -1,7  | -178     | * |
| 210028_s_at  | origin recognition complex, subunit 3-like (y   | AF125507  | 23595     | gb:AF125507.1 /DB_XREF=gi:43: | 2734,82 | 9,9   | 1721,91 | 15,73  | -1,59 | -1,56 | -1,61 | -1012,91 | * |
| 223649_s_at  | CGI-69 protein                                  | AF317711  | 51629     | gb:AF317711.1 /DB_XREF=gi:12! | 1134,36 | 10,26 | 712,16  | 16,34  | -1,59 | -1,53 | -1,66 | -422,19  | * |
| 218787_x_at  | CWF19-like 1, cell cycle control (S. pombe)     | NM_018294 | 55280     | gb:NM_018294.1 /DB_XREF=gi:!  | 464,27  | 3,11  | 292,08  | 4,94   | -1,59 | -1,54 | -1,64 | -172,19  | * |
| 1555334_s_at | solute carrier family 30 (zinc transporter), nr | AF439324  | 64924     | gb:AF439324.1 /DB_XREF=gi:19! | 487,44  | 9,41  | 306,04  | 14,98  | -1,59 | -1,46 | -1,74 | -181,41  | * |
| 225659_at    | hypothetical protein LOC339745                  | BF516590  | 339745    | gb:BF516590 /DB_XREF=gi:1160  | 414,94  | 3,03  | 261,44  | 4,81   | -1,59 | -1,54 | -1,64 | -153,51  | * |
| 228791_at    | Hypothetical protein MGC61550                   | BF434655  | 348110    | gb:BF434655 /DB_XREF=gi:1144  | 384,56  | 11,57 | 242,39  | 18,36  | -1,59 | -1,4  | -1,83 | -142,17  | * |
| 229227_at    | FLJ45244 protein                                | BF511219  | 400242    | gb:BF511219 /DB_XREF=gi:1159  | 378,06  | 4,06  | 237,92  | 6,45   | -1,59 | -1,52 | -1,67 | -140,14  | * |
| 233732_at    | MRNA; cDNA DKFZp566O134 (from clone D           | AL137445  |           | gb:AL137445.1 /DB_XREF=gi:68! | 704,26  | 0,71  | 443,91  | 1,12   | -1,59 | -1,58 | -1,59 | -260,35  | * |
| 214505_s_at  | four and a half LIM domains 1                   | AF220153  | 2273      | gb:AF220153.1 /DB_XREF=gi:69! | 402,66  | 4,3   | 251,29  | 6,89   | -1,6  | -1,53 | -1,68 | -151,37  | * |
| 202592_at    | biogenesis of lysosome-related organelles c     | NM_001487 | 2647      | gb:NM_001487.1 /DB_XREF=gi:!  | 473,76  | 11,4  | 296,43  | 18,22  | -1,6  | -1,44 | -1,79 | -177,33  | * |
| 201644_at    | tissue specific transplantation antigen P35B    | NM_003313 | 7264      | gb:NM_003313.2 /DB_XREF=gi:!  | 923,93  | 6,04  | 578,13  | 9,65   | -1,6  | -1,55 | -1,65 | -345,79  | * |
| 204453_at    | zinc finger protein 84 (HPF2)                   | NM_003428 | 7637      | gb:NM_003428.1 /DB_XREF=gi:!  | 309,28  | 5,85  | 193,19  | 9,36   | -1,6  | -1,47 | -1,75 | -116,08  | * |
| 204871_at    | transcription termination factor, mitochond     | NM_006980 | 7978      | gb:NM_006980.1 /DB_XREF=gi:!  | 496,89  | 5,74  | 310,75  | 9,17   | -1,6  | -1,52 | -1,69 | -186,14  | * |
| 208811_s_at  | DnaJ (Hsp40) homolog, subfamily B, membe        | AF080569  | 10049     | gb:AF080569.1 /DB_XREF=gi:43: | 2000,36 | 24,96 | 1251,73 | 39,89  | -1,6  | -1,51 | -1,69 | -748,63  | * |
| 1555167_s_at | pre-B-cell colony enhancing factor 1            | BC020691  | 10135     | gb:BC020691.1 /DB_XREF=gi:18! | 342,95  | 7,26  | 214,82  | 11,58  | -1,6  | -1,46 | -1,76 | -128,14  | * |
| 242916_at    | centrosomal protein 1                           | AA642477  | 11064     | gb:AA642477 /DB_XREF=gi:2567  | 345,19  | 1,32  | 215,41  | 2,11   | -1,6  | -1,58 | -1,63 | -129,78  | * |
| 214507_s_at  | exosome component 2                             | NM_014285 | 23404     | gb:NM_014285.1 /DB_XREF=gi:!  | 437,11  | 9,92  | 272,97  | 15,88  | -1,6  | -1,45 | -1,78 | -164,14  | * |
| 219260_s_at  | S-phase 2 protein                               | NM_015362 | 23587     | gb:NM_015362.1 /DB_XREF=gi:!  | 519,59  | 5,3   | 325,32  | 8,47   | -1,6  | -1,53 | -1,67 | -194,27  | * |
| 228091_at    | Syntaxin 17                                     | AI800609  | 55014     | gb:AI800609 /DB_XREF=gi:5366: | 714,32  | 5,78  | 446,28  | 9,25   | -1,6  | -1,54 | -1,66 | -268,05  | * |
| 221447_s_at  | glycosyltransferase 8 domain containing 2 /,    | NM_031302 | 83468     | gb:NM_031302.1 /DB_XREF=gi:!  | 353,72  | 9,62  | 221,42  | 15,37  | -1,6  | -1,42 | -1,82 | -132,3   | * |
| 1570523_s_at | APG10 autophagy 10-like (S. cerevisiae)         | AF318326  | 83734     | gb:AF318326.1 /DB_XREF=gi:18! | 424,93  | 6,43  | 265,01  | 10,31  | -1,6  | -1,5  | -1,72 | -159,93  | * |
| 212891_s_at  | growth arrest and DNA-damage-inducible, g       | BF972185  | 90480     | gb:BF972185 /DB_XREF=gi:1233  | 1673,41 | 3,43  | 1048,46 | 5,47   | -1,6  | -1,58 | -1,61 | -624,95  | * |
| 225832_s_at  | KCCR13L                                         | BE795104  | 221955    | gb:BE795104 /DB_XREF=gi:1021  | 304,02  | 6,14  | 189,85  | 9,83   | -1,6  | -1,47 | -1,76 | -114,17  | * |

|              |                                                |           |        |                               |         |       |         |       |       |       |       |          |   |
|--------------|------------------------------------------------|-----------|--------|-------------------------------|---------|-------|---------|-------|-------|-------|-------|----------|---|
| 222987_s_at  | transmembrane protein 9                        | NM_016456 | 252839 | gb:NM_016456.1 /DB_XREF=gi:7  | 1250,97 | 8,32  | 781,74  | 13,31 | -1,6  | -1,55 | -1,65 | -469,23  | * |
| 225200_at    | zinc finger, CSL domain containing 2           | AU151106  | 285381 | gb:AU151106 /DB_XREF=gi:1101  | 486,64  | 8,22  | 303,23  | 13,2  | -1,6  | -1,49 | -1,74 | -183,41  | * |
| 216918_s_at  | dystonin                                       | AL096710  | 667    | gb:AL096710 /DB_XREF=gi:5738  | 1539,89 | 20,62 | 955,32  | 33,24 | -1,61 | -1,52 | -1,72 | -584,57  | * |
| 226160_at    | hexose-6-phosphate dehydrogenase (glucos       | AW138757  | 9563   | gb:AW138757 /DB_XREF=gi:614   | 273,78  | 4,8   | 170,52  | 7,7   | -1,61 | -1,49 | -1,74 | -103,26  | * |
| 200988_s_at  | proteasome (prosome, macropain) activato       | NM_005789 | 10197  | gb:NM_005789.1 /DB_XREF=gi:5  | 632,24  | 9,35  | 392,84  | 15,05 | -1,61 | -1,51 | -1,72 | -239,4   | * |
| 203779_s_at  | epithelial V-like antigen 1                    | NM_005797 | 10205  | gb:NM_005797.1 /DB_XREF=gi:5  | 311,37  | 3,74  | 193,83  | 6     | -1,61 | -1,52 | -1,7  | -117,54  | * |
| 220773_s_at  | gephyrin                                       | NM_020806 | 10243  | gb:NM_020806.1 /DB_XREF=gi:1  | 406,75  | 8,06  | 252,44  | 12,99 | -1,61 | -1,48 | -1,77 | -154,31  | * |
| 218382_s_at  | U2 (RNU2) small nuclear RNA auxiliary facto    | NM_007279 | 11338  | gb:NM_007279.1 /DB_XREF=gi:6  | 322,31  | 10,83 | 200,73  | 17,39 | -1,61 | -1,39 | -1,89 | -121,59  | * |
| 222991_s_at  | ubiquilin 1                                    | AL136643  | 29979  | gb:AL136643.1 /DB_XREF=gi:120 | 1965,12 | 40,48 | 1220,91 | 65,16 | -1,61 | -1,47 | -1,77 | -744,21  | * |
| 1552617_a_at | ring finger and WD repeat domain 2             | NM_022457 | 64326  | gb:NM_022457.4 /DB_XREF=gi:2  | 887,03  | 8,24  | 552,65  | 13,23 | -1,61 | -1,54 | -1,68 | -334,38  | * |
| 226104_at    | Ring finger protein 170                        | AI052736  | 81790  | gb:AI052736 /DB_XREF=gi:3308  | 278,46  | 5,01  | 172,72  | 8,07  | -1,61 | -1,49 | -1,76 | -105,74  | * |
| 214727_at    | breast cancer 2, early onset                   | X95152    | 675    | gb:X95152 /DB_XREF=gi:117154  | 379,2   | 5,13  | 234,01  | 8,31  | -1,62 | -1,52 | -1,73 | -145,19  | * |
| 211080_s_at  | NIMA (never in mitosis gene a)-related kina    | Z25425    | 4751   | gb:Z25425.1 /DB_XREF=gi:40572 | 659,52  | 17,53 | 407,04  | 28,4  | -1,62 | -1,44 | -1,84 | -252,48  | * |
| 210004_at    | oxidised low density lipoprotein (lectin-like) | AF035776  | 4973   | gb:AF035776.1 /DB_XREF=gi:394 | 961,22  | 15,69 | 593,56  | 25,4  | -1,62 | -1,5  | -1,75 | -367,67  | * |
| 200695_at    | protein phosphatase 2 (formerly 2A), regula    | NM_014225 | 5518   | gb:NM_014225.1 /DB_XREF=gi:7  | 333,99  | 5,87  | 206,41  | 9,5   | -1,62 | -1,5  | -1,76 | -127,58  | * |
| 200964_at    | ubiquitin-activating enzyme E1 (A1S9T and I    | NM_003334 | 7317   | gb:NM_003334.1 /DB_XREF=gi:4  | 368,55  | 12,8  | 227,82  | 20,71 | -1,62 | -1,39 | -1,92 | -140,72  | * |
| 228967_at    | Putative translation initiation factor         | BE964053  | 10209  | gb:BE964053 /DB_XREF=gi:1176  | 275,99  | 4,18  | 170,82  | 6,76  | -1,62 | -1,51 | -1,74 | -105,16  | * |
| 227912_s_at  | Exosome component 3                            | AA747303  | 51010  | gb:AA747303 /DB_XREF=gi:2787  | 367,07  | 5,15  | 226,73  | 8,34  | -1,62 | -1,52 | -1,73 | -140,34  | * |
| 1558014_s_at | male sterility domain containing 2             | BG261090  | 84188  | gb:BG261090 /DB_XREF=gi:1277  | 701,41  | 5,81  | 432,44  | 9,42  | -1,62 | -1,56 | -1,69 | -268,97  | * |
| 235428_at    | Transcribed locus, strongly similar to XP_51   | H78106    |        | gb:H78106 /DB_XREF=gi:105619  | 372,3   | 5,52  | 229,66  | 8,95  | -1,62 | -1,52 | -1,74 | -142,64  | * |
| 205195_at    | adaptor-related protein complex 1, sigma 1     | NM_001283 | 1174   | gb:NM_001283.1 /DB_XREF=gi:4  | 492,8   | 8,2   | 302,93  | 13,33 | -1,63 | -1,51 | -1,76 | -189,87  | * |
| 209428_s_at  | zinc finger protein-like 1                     | BG420865  | 7542   | gb:BG420865 /DB_XREF=gi:1332  | 265,29  | 2,37  | 162,35  | 3,87  | -1,63 | -1,57 | -1,71 | -102,94  | * |
| 215832_x_at  | phosphatidylinositol binding clathrin assembl  | AV722190  | 8301   | gb:AV722190 /DB_XREF=gi:1082  | 490,51  | 13,03 | 300,89  | 21,24 | -1,63 | -1,45 | -1,86 | -189,61  | * |
| 204899_s_at  | sin3-associated polypeptide, 30kDa             | BF247098  | 8819   | gb:BF247098 /DB_XREF=gi:1116  | 292,63  | 5,76  | 179,05  | 9,42  | -1,63 | -1,49 | -1,8  | -113,58  | * |
| 218261_at    | adaptor-related protein complex 1, mu 2 su     | NM_005498 | 10053  | gb:NM_005498.2 /DB_XREF=gi:5  | 280,44  | 3,88  | 172,08  | 6,32  | -1,63 | -1,53 | -1,74 | -108,36  | * |
| 231850_x_at  | KIAA1712                                       | AB051499  | 80817  | gb:AB051499.1 /DB_XREF=gi:120 | 772,04  | 6,06  | 473,14  | 9,88  | -1,63 | -1,57 | -1,69 | -298,9   | * |
| 211228_s_at  | RAD17 homolog (S. pombe)                       | AF085736  | 5884   | gb:AF085736.1 /DB_XREF=gi:364 | 543,1   | 6,78  | 330,77  | 11,13 | -1,64 | -1,55 | -1,74 | -212,33  | * |
| 211537_x_at  | mitogen-activated protein kinase kinase kin    | AF218074  | 6885   | gb:AF218074.1 /DB_XREF=gi:674 | 476,8   | 4,94  | 290,1   | 8,12  | -1,64 | -1,57 | -1,73 | -186,69  | * |
| 210978_s_at  | transgelin 2                                   | BC002616  | 8407   | gb:BC002616.1 /DB_XREF=gi:121 | 2214,82 | 27,29 | 1352    | 44,71 | -1,64 | -1,55 | -1,74 | -862,82  | * |
| 208456_s_at  | related RAS viral (r-ras) oncogene homolog     | NM_012250 | 22800  | gb:NM_012250.1 /DB_XREF=gi:6  | 2585,99 | 11,85 | 1575,04 | 19,45 | -1,64 | -1,61 | -1,68 | -1010,95 | * |
| 222242_s_at  | kallikrein 5                                   | AF243527  | 25818  | gb:AF243527 /DB_XREF=gi:1124  | 783,86  | 13,32 | 477,62  | 21,87 | -1,64 | -1,52 | -1,78 | -306,25  | * |
| 228124_at    | chromosome 20 open reading frame 22            | AW303865  | 26090  | gb:AW303865 /DB_XREF=gi:671   | 262,47  | 6,25  | 160,29  | 10,23 | -1,64 | -1,47 | -1,84 | -102,18  | * |
| 229113_s_at  | hypothetical protein FLJ31031                  | W16779    | 199990 | gb:W16779 /DB_XREF=gi:129110  | 534,21  | 6,12  | 325,67  | 10,03 | -1,64 | -1,56 | -1,73 | -208,54  | * |
| 227052_at    | Hypothetical protein LOC201895                 | AI810669  | 201895 | gb:AI810669 /DB_XREF=gi:5397  | 1643,8  | 16,48 | 1004,22 | 26,98 | -1,64 | -1,56 | -1,72 | -639,58  | * |
| 201718_s_at  | erythrocyte membrane protein band 4.1-like     | BF511685  | 2037   | gb:BF511685 /DB_XREF=gi:1159  | 412,31  | 7,4   | 249,71  | 12,23 | -1,65 | -1,52 | -1,8  | -162,6   | * |
| 210153_s_at  | malic enzyme 2, NAD(+)-dependent, mitoch       | M55905    | 4200   | gb:M55905.1 /DB_XREF=gi:1872  | 597,6   | 9,84  | 361,81  | 16,26 | -1,65 | -1,53 | -1,79 | -235,79  | * |
| 230764_at    | Chromosome 9 open reading frame 5              | BF109998  | 23731  | gb:BF109998 /DB_XREF=gi:1093  | 265,46  | 1,2   | 160,93  | 1,99  | -1,65 | -1,61 | -1,69 | -104,53  | * |
| 214790_at    | SUMO1/sentrin specific protease 6              | AK001406  | 26054  | gb:AK001406.1 /DB_XREF=gi:70  | 256,93  | 3,29  | 155,58  | 5,43  | -1,65 | -1,56 | -1,76 | -101,36  | * |
| 219078_at    | G patch domain containing 2                    | NM_018040 | 55105  | gb:NM_018040.1 /DB_XREF=gi:8  | 292,8   | 6,32  | 177     | 10,46 | -1,65 | -1,5  | -1,84 | -115,8   | * |
| 225942_at    | neurolysin (metallopeptidase M3 family)        | AB033052  | 57486  | gb:AB033052.1 /DB_XREF=gi:63  | 277,47  | 4,28  | 168,29  | 7,06  | -1,65 | -1,53 | -1,78 | -109,18  | * |
| 205321_at    | eukaryotic translation initiation factor 2, su | NM_001415 | 1968   | gb:NM_001415.1 /DB_XREF=gi:4  | 1377,37 | 12    | 829,98  | 19,91 | -1,66 | -1,59 | -1,73 | -547,4   | * |
| 1554885_a_at | primase, polypeptide 2A, 58kDa                 | BC017833  | 5558   | gb:BC017833.1 /DB_XREF=gi:17  | 454,83  | 5,22  | 274,08  | 8,66  | -1,66 | -1,57 | -1,76 | -180,75  | * |
| 202129_s_at  | RIO kinase 3 (yeast) /// RIO kinase 3 (yeast)  | AW006290  | 8780   | gb:AW006290 /DB_XREF=gi:585   | 900,22  | 8,92  | 543,18  | 14,79 | -1,66 | -1,58 | -1,74 | -357,04  | * |
| 1554464_a_at | cartilage associated protein                   | BC008745  | 10491  | gb:BC008745.1 /DB_XREF=gi:14  | 1284,23 | 11,89 | 775,21  | 19,7  | -1,66 | -1,59 | -1,73 | -509,02  | * |
| 233809_at    | Huntingtin interacting protein K               | AK022435  | 25764  | gb:AK022435.1 /DB_XREF=gi:104 | 294,79  | 6,35  | 177,16  | 10,57 | -1,66 | -1,5  | -1,86 | -117,63  | * |
| 202407_s_at  | PRP31 pre-mRNA processing factor 31 hom        | BF342707  | 26121  | gb:BF342707 /DB_XREF=gi:1128  | 336,85  | 8,16  | 203,18  | 13,52 | -1,66 | -1,48 | -1,87 | -133,67  | * |
| 236694_at    | Chromosome Y open reading frame 15A            | AW468885  | 246126 | gb:AW468885 /DB_XREF=gi:703   | 417,88  | 6,27  | 251,04  | 10,44 | -1,66 | -1,55 | -1,79 | -166,84  | * |
| 205355_at    | acyl-Coenzyme A dehydrogenase, short/bra       | NM_001609 | 36     | gb:NM_001609.1 /DB_XREF=gi:4  | 435,63  | 6,31  | 261,21  | 10,52 | -1,67 | -1,56 | -1,79 | -174,43  | * |
| 210818_s_at  | BTB and CNC homology 1, basic leucine zipp     | AF026199  | 571    | gb:AF026199.1 /DB_XREF=gi:256 | 404,63  | 2,58  | 242,83  | 4,3   | -1,67 | -1,62 | -1,72 | -161,81  | * |
| 235747_at    | Solute carrier family 25 (mitochondrial carri  | AI305170  | 8034   | gb:AI305170 /DB_XREF=gi:39884 | 309,03  | 10,06 | 185,56  | 16,75 | -1,67 | -1,43 | -1,97 | -123,46  | * |

|              |                                               |           |        |                               |         |       |         |       |       |       |       |          |   |
|--------------|-----------------------------------------------|-----------|--------|-------------------------------|---------|-------|---------|-------|-------|-------|-------|----------|---|
| 201781_s_at  | aryl hydrocarbon receptor interacting prote   | AL558532  | 9049   | gb:AL558532 /DB_XREF=gi:1290  | 594,33  | 6,41  | 355,98  | 10,71 | -1,67 | -1,59 | -1,76 | -238,35  | * |
| 201378_s_at  | ubiquitin associated protein 2-like           | NM_014847 | 9898   | gb:NM_014847.1 /DB_XREF=gi:7  | 408,74  | 8,1   | 244,48  | 13,55 | -1,67 | -1,52 | -1,85 | -164,27  | * |
| 207079_s_at  | mediator of RNA polymerase II transcrip       | NM_005466 | 10001  | gb:NM_005466.1 /DB_XREF=gi:4  | 960,19  | 10,33 | 574,88  | 17,26 | -1,67 | -1,59 | -1,76 | -385,31  | * |
| 219326_s_at  | UDP-GlcNAc:betaGal beta-1,3-N-acetylglucc     | NM_006577 | 10678  | gb:NM_006577.2 /DB_XREF=gi:5  | 271,97  | 8,06  | 162,82  | 13,46 | -1,67 | -1,46 | -1,95 | -109,15  | * |
| 223103_at    | START domain containing 10                    | AF151810  | 10809  | gb:AF151810.1 /DB_XREF=gi:49  | 476,81  | 4,35  | 286,21  | 7,25  | -1,67 | -1,59 | -1,74 | -190,61  | * |
| 212280_x_at  | APG4 autophagy 4 homolog B (S. cerevisiae)    | AA532726  | 23192  | gb:AA532726 /DB_XREF=gi:2278  | 288,18  | 3,44  | 172,27  | 5,75  | -1,67 | -1,58 | -1,78 | -115,91  | * |
| 223879_s_at  | oxidation resistance 1                        | AF309387  | 55074  | gb:AF309387.1 /DB_XREF=gi:10  | 490,05  | 3,07  | 293,44  | 5,13  | -1,67 | -1,62 | -1,72 | -196,61  | * |
| 235559_at    | hypothetical protein FLJ22374                 | AI539542  | 84182  | gb:AI539542 /DB_XREF=gi:4453  | 347,64  | 0,95  | 208,5   | 1,58  | -1,67 | -1,65 | -1,69 | -139,14  | * |
| 208232_x_at  | gb:L12260.1 /DB_XREF=gi:292047 /FEA=FLn       | L12260    |        | gb:L12260.1 /DB_XREF=gi:29204 | 827,1   | 4,07  | 495,28  | 6,8   | -1,67 | -1,63 | -1,71 | -331,82  | * |
| 210186_s_at  | FK506 binding protein 1A, 12kDa               | BC005147  | 2280   | gb:BC005147.1 /DB_XREF=gi:13  | 1717,25 | 16,17 | 1024,44 | 27,11 | -1,68 | -1,6  | -1,76 | -692,81  | * |
| 215708_s_at  | primase, polypeptide 2A, 58kDa                | AL121975  | 5558   | gb:AL121975 /DB_XREF=gi:9663  | 363,42  | 3,18  | 216,01  | 5,35  | -1,68 | -1,61 | -1,76 | -147,41  | * |
| 209754_s_at  | thymopoietin                                  | AF113682  | 7112   | gb:AF113682.1 /DB_XREF=gi:68  | 599,73  | 5,74  | 356,32  | 9,67  | -1,68 | -1,61 | -1,77 | -243,41  | * |
| 209488_s_at  | RNA binding protein with multiple splicing    | D84109    | 11030  | gb:D84109.1 /DB_XREF=gi:1669  | 311,5   | 0,62  | 185,47  | 1,05  | -1,68 | -1,66 | -1,7  | -126,03  | * |
| 211801_x_at  | mitofusin 1                                   | AF329637  | 55669  | gb:AF329637.1 /DB_XREF=gi:12  | 539,81  | 9,18  | 320,87  | 15,44 | -1,68 | -1,55 | -1,83 | -218,94  | * |
| 221423_s_at  | golgi membrane protein SB140 /// golgi me     | NM_030799 | 81555  | gb:NM_030799.1 /DB_XREF=gi:1  | 1080,28 | 3,75  | 644,7   | 6,28  | -1,68 | -1,65 | -1,7  | -435,59  | * |
| 202516_s_at  | discs, large homolog 1 (Drosophila)           | NM_004087 | 1739   | gb:NM_004087.1 /DB_XREF=gi:4  | 284,38  | 3,19  | 167,84  | 5,41  | -1,69 | -1,6  | -1,79 | -116,54  | * |
| 213562_s_at  | squalene epoxidase                            | BF979497  | 6713   | gb:BF979497 /DB_XREF=gi:1234  | 1043,67 | 8,6   | 616,48  | 14,56 | -1,69 | -1,63 | -1,77 | -427,19  | * |
| 219072_at    | B-cell CLL/lymphoma 7C                        | NM_004765 | 9274   | gb:NM_004765.1 /DB_XREF=gi:4  | 558,28  | 6,97  | 330,22  | 11,78 | -1,69 | -1,59 | -1,8  | -228,06  | * |
| 209732_at    | C-type lectin domain family 2, member B       | BC005254  | 9976   | gb:BC005254.1 /DB_XREF=gi:13  | 2729,5  | 15,37 | 1611,86 | 26,03 | -1,69 | -1,65 | -1,74 | -1117,64 | * |
| 212170_at    | RNA binding motif protein 12                  | BF447705  | 10137  | gb:BF447705 /DB_XREF=gi:1151  | 367,02  | 2,83  | 216,72  | 4,79  | -1,69 | -1,63 | -1,76 | -150,3   | * |
| 214493_s_at  | InaD-like (Drosophila)                        | NM_005799 | 10207  | gb:NM_005799.1 /DB_XREF=gi:5  | 294,72  | 6,54  | 174,52  | 11,04 | -1,69 | -1,52 | -1,9  | -120,2   | * |
| 203871_at    | SUMO1/sentrin/SMT3 specific protease 3        | NM_015670 | 26168  | gb:NM_015670.1 /DB_XREF=gi:7  | 605,29  | 12,82 | 358,39  | 21,65 | -1,69 | -1,53 | -1,89 | -246,9   | * |
| 220285_at    | chromosome 9 open reading frame 77            | NM_016014 | 51104  | gb:NM_016014.1 /DB_XREF=gi:7  | 285,77  | 2,19  | 169,5   | 3,69  | -1,69 | -1,62 | -1,75 | -116,27  | * |
| 234942_s_at  | deoxynucleotidyltransferase, terminal, inter  | AK025220  | 116092 | gb:AK025220.1 /DB_XREF=gi:10  | 1194,23 | 9,9   | 706,69  | 16,73 | -1,69 | -1,62 | -1,76 | -487,54  | * |
| 200041_s_at  | HLA-B associated transcript 1 /// HLA-B assc  | NM_004640 | 7919   | gb:NM_004640.1 /DB_XREF=gi:4  | 926,23  | 6,28  | 543,71  | 10,71 | -1,7  | -1,65 | -1,76 | -382,52  | * |
| 219015_s_at  | glycosyltransferase 28 domain containing 1    | NM_018466 | 55849  | gb:NM_018466.1 /DB_XREF=gi:8  | 560,14  | 7,42  | 330,01  | 12,59 | -1,7  | -1,59 | -1,82 | -230,13  | * |
| 221966_at    | chromosome 11 hypothetical protein ORF4       | AA813194  | 56834  | gb:AA813194 /DB_XREF=gi:2883  | 1769,24 | 11,64 | 1041,79 | 19,77 | -1,7  | -1,64 | -1,76 | -727,45  | * |
| 214256_at    | ATPase, Class V, type 10A                     | AB011138  | 57194  | gb:AB011138.1 /DB_XREF=gi:30  | 338,83  | 3,66  | 198,87  | 6,24  | -1,7  | -1,62 | -1,8  | -139,96  | * |
| 1562836_at   | DEAD (Asp-Glu-Ala-Asp) box polypeptide 6      | AK021715  | 1656   | gb:AK021715.1 /DB_XREF=gi:10  | 264,21  | 2,66  | 154,24  | 4,55  | -1,71 | -1,63 | -1,8  | -109,97  | * |
| 200008_s_at  | GDP dissociation inhibitor 2 /// GDP dissoci  | D13988    | 2665   | gb:D13988.1 /DB_XREF=gi:2859  | 3849,45 | 33,37 | 2254,34 | 56,98 | -1,71 | -1,64 | -1,79 | -1595,11 | * |
| 211799_x_at  | Major histocompatibility complex, class I, C  | U62824    | 3107   | gb:U62824.1 /DB_XREF=gi:1575  | 1241,18 | 20,1  | 726,6   | 34,33 | -1,71 | -1,58 | -1,86 | -514,59  | * |
| 242277_at    | Phosphatase and actin regulator 2             | AW880875  | 9749   | gb:AW880875 /DB_XREF=gi:804   | 252,42  | 4,4   | 147,61  | 7,53  | -1,71 | -1,57 | -1,87 | -104,81  | * |
| 203961_at    | nebullette                                    | AL157398  | 10529  | gb:AL157398 /DB_XREF=gi:1004  | 277,69  | 3,08  | 162,79  | 5,26  | -1,71 | -1,61 | -1,81 | -114,89  | * |
| 210829_s_at  | single-stranded DNA binding protein 2         | AF077048  | 23635  | gb:AF077048.1 /DB_XREF=gi:468 | 504,18  | 4,33  | 294,47  | 7,42  | -1,71 | -1,64 | -1,79 | -209,72  | * |
| 211002_s_at  | tripartite motif-containing 29                | AF230389  | 23650  | gb:AF230389.1 /DB_XREF=gi:12  | 423,29  | 8,83  | 247,06  | 15,13 | -1,71 | -1,55 | -1,91 | -176,23  | * |
| 222699_s_at  | pleckstrin homology domain containing, fan    | BF439250  | 79666  | gb:BF439250 /DB_XREF=gi:1145  | 633,23  | 8,42  | 371,33  | 14,37 | -1,71 | -1,6  | -1,83 | -261,9   | * |
| 1553515_at   | helicase/primase complex protein              | NM_138336 | 150678 | gb:NM_138336.1 /DB_XREF=gi:1  | 752,07  | 1,74  | 440,69  | 2,98  | -1,71 | -1,69 | -1,73 | -311,39  | * |
| 239169_at    | RAD52 homolog B (S. cerevisiae)               | AA761980  | 201299 | gb:AA761980 /DB_XREF=gi:281   | 350,34  | 3,21  | 205,18  | 5,49  | -1,71 | -1,63 | -1,79 | -145,16  | * |
| 214845_s_at  | calumenin                                     | AF257659  | 813    | gb:AF257659.1 /DB_XREF=gi:85  | 411,28  | 5,51  | 239,45  | 9,46  | -1,72 | -1,61 | -1,84 | -171,83  | * |
| 223758_s_at  | general transcription factor IIH, polypeptide | BC005345  | 2966   | gb:BC005345.1 /DB_XREF=gi:13  | 497,32  | 3,54  | 288,97  | 6,08  | -1,72 | -1,66 | -1,79 | -208,35  | * |
| 1554768_a_at | MAD2 mitotic arrest deficient-like 1 (yeast)  | AF394735  | 4085   | gb:AF394735.1 /DB_XREF=gi:25  | 2657,68 | 17,14 | 1542,34 | 29,53 | -1,72 | -1,67 | -1,78 | -1115,34 | * |
| 223115_at    | cofactor required for Sp1 transcriptional act | AK001674  | 9440   | gb:AK001674.1 /DB_XREF=gi:70  | 386,5   | 4,76  | 224,72  | 8,18  | -1,72 | -1,62 | -1,84 | -161,78  | * |
| 212528_at    | DNA segment, Chr 15, Wayne State Universi     | AI348009  | 27351  | gb:AI348009 /DB_XREF=gi:4085  | 246,22  | 3,31  | 142,74  | 5,71  | -1,72 | -1,61 | -1,85 | -103,48  | * |
| 1553661_a_at | HUS1 checkpoint homolog b (S. pombe)          | NM_148959 | 135458 | gb:NM_148959.1 /DB_XREF=gi:2  | 254,55  | 2,12  | 148,29  | 3,63  | -1,72 | -1,65 | -1,79 | -106,26  | * |
| 201866_s_at  | nuclear receptor subfamily 3, group C, mem    | NM_000176 | 2908   | gb:NM_000176.1 /DB_XREF=gi:4  | 768,56  | 12,15 | 445,37  | 20,96 | -1,73 | -1,59 | -1,88 | -323,2   | * |
| 225575_at    | Leukemia inhibitory factor receptor           | AI680541  | 3977   | gb:AI680541 /DB_XREF=gi:4890  | 360,89  | 4,19  | 208,55  | 7,25  | -1,73 | -1,63 | -1,84 | -152,34  | * |
| 206166_s_at  | chloride channel, calcium activated, family r | AF043977  | 9635   | gb:AF043977.1 /DB_XREF=gi:51  | 269,11  | 1,75  | 155,96  | 3,02  | -1,73 | -1,67 | -1,79 | -113,16  | * |
| 212595_s_at  | DAZ associated protein 2                      | AL534321  | 9802   | gb:AL534321 /DB_XREF=gi:1279  | 978,95  | 10,62 | 565,58  | 18,38 | -1,73 | -1,64 | -1,83 | -413,37  | * |
| 226882_x_at  | WD repeat domain 4                            | AI861913  | 10785  | gb:AI861913 /DB_XREF=gi:5526  | 370,69  | 8,48  | 214,37  | 14,67 | -1,73 | -1,54 | -1,96 | -156,32  | * |
| 228824_s_at  | leukotriene B4 12-hydroxydehydrogenase        | BE566894  | 22949  | gb:BE566894 /DB_XREF=gi:9810  | 1772,94 | 23,66 | 1021,89 | 41,06 | -1,73 | -1,62 | -1,86 | -751,05  | * |

|              |                                               |           |        |                                  |         |       |         |       |       |       |       |          |   |
|--------------|-----------------------------------------------|-----------|--------|----------------------------------|---------|-------|---------|-------|-------|-------|-------|----------|---|
| 202736_s_at  | LSM4 homolog, U6 small nuclear RNA assoc      | AA112507  | 25804  | gb:AA112507 /DB_XREF=gi:1665     | 2381,4  | 27,56 | 1372,82 | 47,82 | -1,73 | -1,64 | -1,85 | -1008,59 | * |
| 213872_at    | Chromosome 6 open reading frame 62            | BE465032  | 81688  | gb:BE465032 /DB_XREF=gi:9510     | 1089,63 | 12,07 | 629,39  | 20,89 | -1,73 | -1,64 | -1,84 | -460,24  | * |
| 239431_at    | toll-like receptor adaptor molecule 2         | AI400110  | 353376 | gb:AI400110 /DB_XREF=gi:4243:    | 246,82  | 5,93  | 142,68  | 10,25 | -1,73 | -1,54 | -1,97 | -104,15  | * |
| 241887_at    | CDNA FLJ41537 fis, clone BRTHA2017985         | AI370381  |        | gb:AI370381 /DB_XREF=gi:4149:    | 366,95  | 6,17  | 211,83  | 10,68 | -1,73 | -1,59 | -1,9  | -155,12  | * |
| 205627_at    | cytidine deaminase                            | NM_001785 | 978    | gb:NM_001785.1 /DB_XREF=gi:1     | 240,62  | 7,64  | 137,92  | 13,34 | -1,74 | -1,49 | -2,09 | -102,71  | * |
| 204384_at    | golgi autoantigen, golgin subfamily a, 2      | NM_004486 | 2801   | gb:NM_004486.1 /DB_XREF=gi:4     | 316,36  | 3,72  | 182,27  | 6,46  | -1,74 | -1,63 | -1,85 | -134,08  | * |
| 204128_s_at  | replication factor C (activator 1) 3, 38kDa   | NM_002915 | 5983   | gb:NM_002915.1 /DB_XREF=gi:4     | 801,62  | 9,42  | 461,07  | 16,38 | -1,74 | -1,64 | -1,85 | -340,55  | * |
| 205071_x_at  | X-ray repair complementing defective repair   | AB017445  | 7518   | gb:AB017445.1 /DB_XREF=gi:121    | 701,19  | 5,75  | 404,09  | 9,98  | -1,74 | -1,66 | -1,81 | -297,1   | * |
| 224173_s_at  | mitochondrial ribosomal protein L30           | BC000217  | 51263  | gb:BC000217.1 /DB_XREF=gi:121    | 471,87  | 4,04  | 271,76  | 7,01  | -1,74 | -1,66 | -1,82 | -200,1   | * |
| 221268_s_at  | sphingosine-1-phosphate phosphatase 1 ///     | NM_030791 | 81537  | gb:NM_030791.1 /DB_XREF=gi:1     | 1218,32 | 8,09  | 699,37  | 14,1  | -1,74 | -1,68 | -1,8  | -518,96  | * |
| 220033_at    | gb:NM_024601.1 /DB_XREF=gi:13375802 /C        | NM_024601 |        | gb:NM_024601.1 /DB_XREF=gi:1     | 270     | 9,04  | 155,5   | 15,69 | -1,74 | -1,47 | -2,1  | -114,5   | * |
| 213470_s_at  | heterogeneous nuclear ribonucleoprotein H     | BF983406  | 3187   | gb:BF983406 /DB_XREF=gi:1238     | 522,59  | 6,83  | 299,13  | 11,93 | -1,75 | -1,63 | -1,88 | -223,45  | * |
| 1554417_s_at | anterior pharynx defective 1 homolog A (C.    | AY113699  | 51107  | gb:AY113699.1 /DB_XREF=gi:259    | 478,88  | 8,22  | 273,5   | 14,4  | -1,75 | -1,6  | -1,92 | -205,38  | * |
| 213882_at    | Beta-amyloid binding protein precursor        | AA012917  | 83941  | gb:AA012917 /DB_XREF=gi:1473     | 253,98  | 5,98  | 145,39  | 10,45 | -1,75 | -1,55 | -1,99 | -108,59  | * |
| 1555679_a_at | reticulon 4 interacting protein 1             | AF439711  | 84816  | gb:AF439711.1 /DB_XREF=gi:171    | 252,49  | 3,67  | 144,68  | 6,41  | -1,75 | -1,62 | -1,89 | -107,81  | * |
| 225400_at    | chromosome 1 open reading frame 19            | BF111780  | 116461 | gb:BF111780 /DB_XREF=gi:1094     | 432,26  | 10,43 | 246,86  | 18,26 | -1,75 | -1,55 | -2    | -185,4   | * |
| 1552417_a_at | neural precursor cell expressed, developme    | NM_152905 | 121441 | gb:NM_152905.1 /DB_XREF=gi:2     | 458,2   | 10,13 | 262,15  | 17,71 | -1,75 | -1,56 | -1,98 | -196,05  | * |
| 214896_at    | MRNA full length insert cDNA clone EUROIM     | AL109671  |        | gb:AL109671.1 /DB_XREF=gi:568    | 292,12  | 1,06  | 166,68  | 1,86  | -1,75 | -1,72 | -1,79 | -125,44  | * |
| 202604_x_at  | a disintegrin and metalloproteinase domain    | NM_001110 | 102    | gb:NM_001110.1 /DB_XREF=gi:4     | 376,18  | 6,49  | 213,98  | 11,4  | -1,76 | -1,61 | -1,93 | -162,19  | * |
| 203806_s_at  | Fanconi anemia, complementation group A       | NM_000135 | 2175   | gb:NM_000135.1 /DB_XREF=gi:4     | 264,38  | 3,58  | 149,98  | 6,32  | -1,76 | -1,64 | -1,9  | -114,4   | * |
| 201028_s_at  | CD99 antigen                                  | U82164    | 4267   | gb:U82164.1 /DB_XREF=gi:2149     | 498,09  | 8,09  | 282,53  | 14,26 | -1,76 | -1,62 | -1,93 | -215,57  | * |
| 216765_at    | Mitogen-activated protein kinase kinase 5     | AK025177  | 5607   | gb:AK025177.1 /DB_XREF=gi:104    | 285,34  | 1,05  | 162,08  | 1,84  | -1,76 | -1,73 | -1,8  | -123,26  | * |
| 211749_s_at  | vesicle-associated membrane protein 3 (cell   | BC005941  | 9341   | gb:BC005941.1 /DB_XREF=gi:131    | 1891,39 | 12,39 | 1073,04 | 21,85 | -1,76 | -1,7  | -1,83 | -818,35  | * |
| 214657_s_at  | Trophoblast-derived noncoding RNA             | AU134977  | 283131 | gb:AU134977 /DB_XREF=gi:1099     | 355,57  | 3,75  | 202,55  | 6,59  | -1,76 | -1,66 | -1,86 | -153,02  | * |
| 1559161_at   | Hypothetical protein LOC284804                | AI871356  | 284804 | gb:AI871356 /DB_XREF=gi:55454    | 252,14  | 2,09  | 143,08  | 3,68  | -1,76 | -1,69 | -1,84 | -109,06  | * |
| 1569952_x_at | Homo sapiens, Similar to syndecan binding p   | BC030617  |        | gb:BC030617.1 /DB_XREF=gi:211    | 515,91  | 2,78  | 293,97  | 4,87  | -1,76 | -1,71 | -1,81 | -221,95  | * |
| 209761_s_at  | SP110 nuclear body protein                    | AA969194  | 3431   | gb:AA969194 /DB_XREF=gi:3144     | 268,82  | 5,84  | 152,07  | 10,32 | -1,77 | -1,58 | -2    | -116,75  | * |
| 209041_s_at  | ubiquitin-conjugating enzyme E2G 2 (UBC7)     | BG395660  | 7327   | gb:BG395660 /DB_XREF=gi:1328     | 331,08  | 5,05  | 186,96  | 8,94  | -1,77 | -1,63 | -1,93 | -144,12  | * |
| 220183_s_at  | nudix (nucleoside diphosphate linked moiety   | NM_007083 | 11162  | gb:NM_007083.1 /DB_XREF=gi:1     | 255,92  | 6,32  | 144,32  | 11,21 | -1,77 | -1,56 | -2,04 | -111,6   | * |
| 91703_at     | EH domain binding protein 1-like 1            | AA149545  | 254102 | Cluster Incl. AA149545:zl28g08.r | 233,04  | 6,04  | 131,8   | 10,69 | -1,77 | -1,55 | -2,05 | -101,24  | * |
| 226458_at    | CDNA FLJ30340 fis, clone BRACE2007411         | AL559202  |        | gb:AL559202 /DB_XREF=gi:1290     | 785,99  | 8,04  | 443,34  | 14,25 | -1,77 | -1,68 | -1,88 | -342,65  | * |
| 216252_x_at  | Fas (TNF receptor superfamily, member 6)      | Z70519    | 355    | gb:Z70519.1 /DB_XREF=gi:14188    | 683,52  | 6,96  | 384,02  | 12,4  | -1,78 | -1,69 | -1,88 | -299,5   | * |
| 1554930_a_at | fucosyltransferase 8 (alpha (1,6) fucosyltran | AB049740  | 2530   | gb:AB049740.2 /DB_XREF=gi:18:    | 256,49  | 5,17  | 144,48  | 9,18  | -1,78 | -1,6  | -1,99 | -112,02  | * |
| 207935_s_at  | keratin 13                                    | NM_002274 | 3860   | gb:NM_002274.1 /DB_XREF=gi:4     | 317,75  | 2,3   | 178,26  | 4,09  | -1,78 | -1,71 | -1,86 | -139,48  | * |
| 210318_at    | retinol binding protein 3, interstitial       | J03912    | 5949   | gb:J03912.1 /DB_XREF=gi:18654    | 238,86  | 0,34  | 134,27  | 0,6   | -1,78 | -1,77 | -1,79 | -104,58  | * |
| 207827_x_at  | synuclein, alpha (non A4 component of amy     | L36675    | 6622   | gb:L36675.1 /DB_XREF=gi:55621    | 255,35  | 7,58  | 143,46  | 13,48 | -1,78 | -1,53 | -2,12 | -111,9   | * |
| 228630_at    | Zinc finger protein 84 (HPF2)                 | W92744    | 7637   | gb:W92744 /DB_XREF=gi:14219      | 247,87  | 4,99  | 139,1   | 8,89  | -1,78 | -1,6  | -2    | -108,77  | * |
| 223847_s_at  | endoplasmic reticulum-golgi intermediate c    | AF267855  | 57222  | gb:AF267855.1 /DB_XREF=gi:121    | 444,09  | 0,67  | 249,56  | 1,2   | -1,78 | -1,76 | -1,79 | -194,53  | * |
| 226002_at    | GRB2-associated binding protein 1             | AK022142  | 2549   | gb:AK022142.1 /DB_XREF=gi:104    | 268,24  | 5,78  | 150,16  | 10,32 | -1,79 | -1,6  | -2,02 | -118,08  | * |
| 227905_s_at  | 5-azacytidine induced 2                       | BF000175  | 64343  | gb:BF000175 /DB_XREF=gi:1070     | 392,47  | 10,66 | 218,68  | 19,14 | -1,79 | -1,56 | -2,11 | -173,79  | * |
| 215430_at    | glycerol kinase 2                             | AA757089  | 2712   | gb:AA757089 /DB_XREF=gi:2804     | 317,12  | 0,76  | 176,58  | 1,37  | -1,8  | -1,77 | -1,82 | -140,53  | * |
| 211574_s_at  | membrane cofactor protein (CD46, trophob      | D84105    | 4179   | gb:D84105.1 /DB_XREF=gi:1256     | 342,37  | 10,34 | 189,7   | 18,66 | -1,8  | -1,54 | -2,17 | -152,67  | * |
| 235344_at    | Protein phosphatase 1A (formerly 2C), magi    | BG288054  | 5494   | gb:BG288054 /DB_XREF=gi:1304     | 242,57  | 3,87  | 134,87  | 6,97  | -1,8  | -1,65 | -1,97 | -107,7   | * |
| 210285_x_at  | Wilms tumor 1 associated protein              | BC000383  | 9589   | gb:BC000383.1 /DB_XREF=gi:121    | 477,25  | 6     | 264,71  | 10,82 | -1,8  | -1,68 | -1,94 | -212,54  | * |
| 212179_at    | chromosome 6 open reading frame 111           | AW157501  | 25957  | gb:AW157501 /DB_XREF=gi:622      | 260,69  | 3,39  | 144,5   | 6,11  | -1,8  | -1,68 | -1,94 | -116,19  | * |
| 233555_s_at  | sulfatase 2                                   | AL034418  | 55959  | gb:AL034418 /DB_XREF=gi:1154     | 425,19  | 1,44  | 235,83  | 2,59  | -1,8  | -1,77 | -1,84 | -189,35  | * |
| 238469_at    | Chromosome 6 open reading frame 155           | BE620374  | 79940  | gb:BE620374 /DB_XREF=gi:9891     | 259,75  | 5,25  | 144,51  | 9,43  | -1,8  | -1,61 | -2,02 | -115,24  | * |
| 229128_s_at  | Acidic (leucine-rich) nuclear phosphoprotein  | AI697657  | 81611  | gb:AI697657 /DB_XREF=gi:49851    | 1339,26 | 21,83 | 746,04  | 39,19 | -1,8  | -1,65 | -1,97 | -593,23  | * |
| 211676_s_at  | interferon gamma receptor 1 /// interferon    | AF056979  | 3459   | gb:AF056979.1 /DB_XREF=gi:131    | 1489,99 | 17,77 | 822,64  | 32,19 | -1,81 | -1,7  | -1,94 | -667,35  | * |
| 214484_s_at  | opioid receptor, sigma 1                      | AF226604  | 10280  | gb:AF226604.1 /DB_XREF=gi:758    | 352,79  | 5,69  | 194,6   | 10,32 | -1,81 | -1,66 | -1,99 | -158,19  | * |

|              |                                                              |           |        |                               |         |       |         |       |       |       |       |          |   |
|--------------|--------------------------------------------------------------|-----------|--------|-------------------------------|---------|-------|---------|-------|-------|-------|-------|----------|---|
| 207993_s_at  | calcium binding protein P22                                  | NM_007236 | 11261  | gb:NM_007236.1 /DB_XREF=gi:6  | 370,39  | 3,52  | 204,51  | 6,38  | -1,81 | -1,72 | -1,91 | -165,88  | * |
| 202748_at    | guanylate binding protein 2, interferon-inducible            | NM_004120 | 2634   | gb:NM_004120.2 /DB_XREF=gi:6  | 320,1   | 7,45  | 176,19  | 13,54 | -1,82 | -1,6  | -2,09 | -143,91  | * |
| 210154_at    | malic enzyme 2, NAD(+)-dependent, mitochondrial              | M55905    | 4200   | gb:M55905.1 /DB_XREF=gi:1872  | 229,25  | 4,41  | 126,17  | 8,02  | -1,82 | -1,64 | -2,04 | -103,09  | * |
| 210935_s_at  | WD repeat domain 1                                           | AF274954  | 9948   | gb:AF274954.1 /DB_XREF=gi:127 | 305,53  | 3,34  | 167,98  | 6,07  | -1,82 | -1,71 | -1,94 | -137,54  | * |
| 1555240_s_at | guanine nucleotide binding protein (G protein-coupled)       | AF493879  | 55970  | gb:AF493879.1 /DB_XREF=gi:207 | 1389,7  | 17,99 | 764,54  | 32,69 | -1,82 | -1,69 | -1,96 | -625,16  | * |
| 214164_x_at  | carbonic anhydrase XII                                       | BF752277  | 771    | gb:BF752277 /DB_XREF=gi:1207  | 270,24  | 4,51  | 148,03  | 8,24  | -1,83 | -1,67 | -2,02 | -122,2   | * |
| 216607_s_at  | cytochrome P450, family 51, subfamily A, polypeptide 1       | U40053    | 1595   | gb:U40053 /DB_XREF=gi:118406  | 850,6   | 13,55 | 465,08  | 24,77 | -1,83 | -1,67 | -2,01 | -385,52  | * |
| 200722_s_at  | membrane component, chromosome 11, subfamily 1               | BG258784  | 4076   | gb:BG258784 /DB_XREF=gi:1276  | 958,68  | 6,74  | 523,05  | 12,35 | -1,83 | -1,76 | -1,91 | -435,63  | * |
| 223181_at    | chromosome 18 open reading frame 55                          | BC000892  | 29090  | gb:BC000892.1 /DB_XREF=gi:126 | 578,65  | 3,25  | 315,89  | 5,95  | -1,83 | -1,77 | -1,89 | -262,76  | * |
| 244107_at    | gb:AW189097 /DB_XREF=gi:6463533 /DB_XREF=gi:646              | AW189097  |        | gb:AW189097 /DB_XREF=gi:646   | 252,73  | 4,48  | 138,37  | 8,18  | -1,83 | -1,66 | -2,03 | -114,35  | * |
| 233851_s_at  | torsin family 3, member A                                    | AJ299441  | 64222  | gb:AJ299441.1 /DB_XREF=gi:110 | 233,26  | 5,08  | 126,71  | 9,35  | -1,84 | -1,63 | -2,1  | -106,54  | * |
| 214931_s_at  | SFRS protein kinase 2                                        | AC005070  | 6733   | gb:AC005070 /DB_XREF=gi:3406  | 590,11  | 3,38  | 319,5   | 6,25  | -1,85 | -1,79 | -1,91 | -270,61  | * |
| 218439_s_at  | COMM domain containing 10                                    | NM_016144 | 51397  | gb:NM_016144.1 /DB_XREF=gi:7  | 1738,48 | 19,81 | 937,89  | 36,72 | -1,85 | -1,74 | -1,99 | -800,59  | * |
| 228062_at    | nucleosome assembly protein 1-like 5                         | AW025330  | 266812 | gb:AW025330 /DB_XREF=gi:587   | 244,07  | 4,53  | 131,8   | 8,39  | -1,85 | -1,67 | -2,08 | -112,27  | * |
| 1558105_a_at | gb:AK096921.1 /DB_XREF=gi:21756524 /TIC                      | AK096921  |        | gb:AK096921.1 /DB_XREF=gi:217 | 292,75  | 2,18  | 158,51  | 4,03  | -1,85 | -1,77 | -1,93 | -134,24  | * |
| 206164_at    | chloride channel, calcium activated, family rho              | NM_006536 | 9635   | gb:NM_006536.2 /DB_XREF=gi:1  | 598,85  | 3,09  | 321,78  | 5,75  | -1,86 | -1,81 | -1,92 | -277,07  | * |
| 224460_s_at  | chromosome 14 open reading frame 160 //                      | BC006117  | 79944  | gb:BC006117.1 /DB_XREF=gi:13! | 289     | 6,4   | 155,37  | 11,9  | -1,86 | -1,64 | -2,14 | -133,64  | * |
| 201123_s_at  | eukaryotic translation initiation factor 5A                  | NM_001970 | 1984   | gb:NM_001970.1 /DB_XREF=gi:4  | 6169,96 | 32,09 | 3306,92 | 59,88 | -1,87 | -1,81 | -1,93 | -2863,04 | * |
| 1565681_s_at | KIAA0934                                                     | N42910    | 22982  | gb:N42910 /DB_XREF=gi:116665  | 226,35  | 5,43  | 120,98  | 10,16 | -1,87 | -1,63 | -2,18 | -105,37  | * |
| 1555078_at   | hypothetical protein MGC46336                                | BC036762  | 283933 | gb:BC036762.1 /DB_XREF=gi:224 | 230,34  | 2,84  | 123,19  | 5,31  | -1,87 | -1,74 | -2,02 | -107,15  | * |
| 228851_s_at  | endosulfine alpha                                            | AV726322  | 2029   | gb:AV726322 /DB_XREF=gi:1083  | 1360,3  | 14,91 | 722,91  | 28,06 | -1,88 | -1,76 | -2,01 | -637,39  | * |
| 206288_at    | protein geranylgeranyltransferase type I, beta               | NM_005023 | 5229   | gb:NM_005023.1 /DB_XREF=gi:4  | 273,04  | 6,52  | 144,99  | 12,28 | -1,88 | -1,64 | -2,2  | -128,06  | * |
| 204344_s_at  | Sec23 homolog A (S. cerevisiae)                              | NM_006364 | 10484  | gb:NM_006364.1 /DB_XREF=gi:5  | 912,4   | 5,17  | 484,34  | 9,73  | -1,88 | -1,82 | -1,95 | -428,06  | * |
| 220955_x_at  | RAB23, member RAS oncogene family                            | NM_016277 | 51715  | gb:NM_016277.1 /DB_XREF=gi:7  | 223     | 5,21  | 118,44  | 9,81  | -1,88 | -1,65 | -2,19 | -104,56  | * |
| 216495_x_at  | IgG to Puumala virus G2, light chain variable region         | AF043584  |        | gb:AF043584.1 /DB_XREF=gi:286 | 269,72  | 2,02  | 143,09  | 3,8   | -1,88 | -1,8  | -1,97 | -126,62  | * |
| 202376_at    | serine (or cysteine) proteinase inhibitor, clade B, member 1 | NM_001085 | 12     | gb:NM_001085.2 /DB_XREF=gi:5  | 428,8   | 11,74 | 227,31  | 22,14 | -1,89 | -1,61 | -2,26 | -201,49  | * |
| 201551_s_at  | lysosomal-associated membrane protein 1                      | J03263    | 3916   | gb:J03263.1 /DB_XREF=gi:18717 | 611,54  | 7,46  | 324,13  | 14,08 | -1,89 | -1,76 | -2,04 | -287,41  | * |
| 207175_at    | adiponectin, C1Q and collagen domain containing              | NM_004797 | 9370   | gb:NM_004797.1 /DB_XREF=gi:4  | 242,07  | 0,96  | 128,27  | 1,81  | -1,89 | -1,84 | -1,93 | -113,8   | * |
| 216032_s_at  | serologically defined breast cancer antigen 1                | AF091085  | 51614  | gb:AF091085.1 /DB_XREF=gi:386 | 1010,18 | 12,95 | 533,62  | 24,52 | -1,89 | -1,75 | -2,05 | -476,57  | * |
| 237108_x_at  | FLJ42875 protein                                             | AW611845  | 440556 | gb:AW611845 /DB_XREF=gi:731   | 236,91  | 5,07  | 125,64  | 9,56  | -1,89 | -1,67 | -2,16 | -111,27  | * |
| 1565717_s_at | fusion (involved in t(12;16) in malignant liposarcoma)       | BE930017  | 2521   | gb:BE930017 /DB_XREF=gi:1045  | 315,01  | 5,49  | 165,82  | 10,42 | -1,9  | -1,71 | -2,13 | -149,19  | * |
| 216080_s_at  | fatty acid desaturase 3                                      | AC004770  | 3995   | gb:AC004770 /DB_XREF=gi:3212  | 558,22  | 6,47  | 293,13  | 12,33 | -1,9  | -1,78 | -2,05 | -265,09  | * |
| 201120_s_at  | progesterone receptor membrane component 1                   | AL547946  | 10857  | gb:AL547946 /DB_XREF=gi:1288  | 1588,65 | 19,21 | 834,47  | 36,57 | -1,9  | -1,77 | -2,06 | -754,18  | * |
| 220477_s_at  | chromosome 20 open reading frame 30                          | NM_014145 | 29058  | gb:NM_014145.1 /DB_XREF=gi:7  | 1113,47 | 7,81  | 587,51  | 14,8  | -1,9  | -1,82 | -1,98 | -525,96  | * |
| 1553603_s_at | ADP-ribosylation factor-like 6 interacting protein           | NM_022374 | 64225  | gb:NM_022374.1 /DB_XREF=gi:1  | 409,64  | 4,14  | 216,12  | 7,85  | -1,9  | -1,78 | -2,02 | -193,52  | * |
| 225341_at    | transcription termination factor-like protein 1              | BF697312  | 80298  | gb:BF697312 /DB_XREF=gi:1198  | 242,77  | 4,09  | 127,49  | 7,79  | -1,9  | -1,72 | -2,12 | -115,27  | * |
| 200756_x_at  | calumenin                                                    | U67280    | 813    | gb:U67280.1 /DB_XREF=gi:2809  | 241,07  | 4,84  | 126,37  | 9,23  | -1,91 | -1,69 | -2,18 | -114,71  | * |
| 202145_at    | lymphocyte antigen 6 complex, locus E                        | NM_002346 | 4061   | gb:NM_002346.1 /DB_XREF=gi:4  | 456,74  | 7,41  | 239,05  | 14,17 | -1,91 | -1,73 | -2,12 | -217,69  | * |
| 210543_s_at  | protein kinase, DNA-activated, catalytic polypeptide chain   | U34994    | 5591   | gb:U34994.3 /DB_XREF=gi:1360  | 1948,15 | 23,86 | 1017,54 | 45,68 | -1,91 | -1,78 | -2,07 | -930,61  | * |
| 212214_at    | optic atrophy 1 (autosomal dominant)                         | BF439570  | 4976   | gb:BF439570 /DB_XREF=gi:1145  | 565,07  | 9,64  | 293,91  | 18,53 | -1,92 | -1,73 | -2,15 | -271,16  | * |
| 214149_s_at  | ATPase, H+ transporting, lysosomal 9kDa, V0 type             | AI252582  | 8992   | gb:AI252582 /DB_XREF=gi:3849  | 949,89  | 7,62  | 494,85  | 14,63 | -1,92 | -1,83 | -2,02 | -455,04  | * |
| 210458_s_at  | TRAF family member-associated NFKB activator 1               | BC003388  | 10010  | gb:BC003388.1 /DB_XREF=gi:136 | 261,04  | 5,8   | 136,29  | 11,11 | -1,92 | -1,68 | -2,22 | -124,75  | * |
| 231412_at    | hypothetical gene supported by BX538329                      | H04388    | 441366 | gb:H04388 /DB_XREF=gi:867321  | 298,73  | 3,27  | 155,61  | 6,27  | -1,92 | -1,8  | -2,06 | -143,12  | * |
| 203357_s_at  | calpain 7                                                    | NM_014296 | 23473  | gb:NM_014296.1 /DB_XREF=gi:7  | 631,1   | 9,98  | 327,74  | 19,22 | -1,93 | -1,75 | -2,14 | -303,36  | * |
| 208606_s_at  | wingless-type MMTV integration site family 1                 | NM_030761 | 54361  | gb:NM_030761.1 /DB_XREF=gi:1  | 272,76  | 4,51  | 141,44  | 8,69  | -1,93 | -1,74 | -2,15 | -131,32  | * |
| 1552660_a_at | hypothetical protein FLJ11193                                | BC021215  | 55322  | gb:BC021215.1 /DB_XREF=gi:18! | 322,93  | 4,61  | 167,74  | 8,88  | -1,93 | -1,76 | -2,11 | -155,19  | * |
| 201742_x_at  | splicing factor, arginine/serine-rich 1 (spliceosome)        | NM_006924 | 6426   | gb:NM_006924.1 /DB_XREF=gi:5  | 720,51  | 9,93  | 371,61  | 19,26 | -1,94 | -1,78 | -2,13 | -348,9   | * |
| 201337_s_at  | vesicle-associated membrane protein 3 (cell surface)         | NM_004781 | 9341   | gb:NM_004781.2 /DB_XREF=gi:5  | 908,32  | 7,74  | 467,84  | 15,03 | -1,94 | -1,84 | -2,05 | -440,47  | * |
| 223489_x_at  | exosome component 3                                          | AW015573  | 51010  | gb:AW015573 /DB_XREF=gi:586   | 423,55  | 6,85  | 218,81  | 13,26 | -1,94 | -1,75 | -2,16 | -204,75  | * |
| 222507_s_at  | chromosome 11 open reading frame 15                          | AI188389  | 56674  | gb:AI188389 /DB_XREF=gi:3739! | 1589,94 | 30,98 | 818,4   | 60,18 | -1,94 | -1,72 | -2,22 | -771,54  | * |



|              |                                                |           |               |                                |         |       |         |       |       |       |       |          |   |
|--------------|------------------------------------------------|-----------|---------------|--------------------------------|---------|-------|---------|-------|-------|-------|-------|----------|---|
| 231918_s_at  | G elongation factor, mitochondrial 2           | AK025314  | 84340         | gb:AK025314.1 /DB_XREF=gi:10   | 445,7   | 5,66  | 230,18  | 10,95 | -1,94 | -1,79 | -2,11 | -215,52  | * |
| 206482_at    | PTK6 protein tyrosine kinase 6                 | NM_005975 | 5753          | gb:NM_005975.1 /DB_XREF=gi:5   | 253,58  | 1,27  | 129,74  | 2,47  | -1,95 | -1,89 | -2,02 | -123,84  | * |
| 213195_at    | hypothetical protein LOC201229                 | AI625844  | 201229        | gb:AI625844 /DB_XREF=gi:4650   | 229,73  | 2,25  | 117,7   | 4,39  | -1,95 | -1,83 | -2,08 | -112,02  | * |
| 1555226_s_at | chromosome 1 open reading frame 43             | BC008306  | 25912         | gb:BC008306.1 /DB_XREF=gi:14   | 1983,79 | 22,29 | 1010,92 | 43,74 | -1,96 | -1,83 | -2,12 | -972,88  | * |
| 1555814_a_at | ras homolog gene family, member A              | AF498970  | 387           | gb:AF498970.1 /DB_XREF=gi:20   | 3205,74 | 35,85 | 1628,32 | 70,57 | -1,97 | -1,83 | -2,12 | -1577,42 | * |
| 201539_s_at  | four and a half LIM domains 1                  | U29538    | 2273          | gb:U29538.1 /DB_XREF=gi:2078   | 391,63  | 5,02  | 198,72  | 9,89  | -1,97 | -1,82 | -2,15 | -192,91  | * |
| 216556_x_at  | gb:AL135926 /DB_XREF=gi:9801286 /FEA=D         | AL135926  |               | gb:AL135926 /DB_XREF=gi:9801   | 1016,68 | 2,72  | 513,81  | 5,38  | -1,98 | -1,94 | -2,01 | -502,87  | * |
| 1552921_a_at | fidgetin-like 1                                | NM_022116 | 63979         | gb:NM_022116.1 /DB_XREF=gi:1   | 364,89  | 4,79  | 182,95  | 9,56  | -1,99 | -1,83 | -2,19 | -181,94  | * |
| 207549_x_at  | membrane cofactor protein (CD46, trophob       | NM_002389 | 4179          | gb:NM_002389.1 /DB_XREF=gi:1   | 411,06  | 10,49 | 205,02  | 21,04 | -2    | -1,71 | -2,42 | -206,04  | * |
| 230314_at    | Similar to hypothetical protein 628            | AW014557  | 440424        | gb:AW014557 /DB_XREF=gi:586    | 233,51  | 4,78  | 116,93  | 9,54  | -2    | -1,75 | -2,31 | -116,58  | * |
| 201841_s_at  | heat shock 27kDa protein 1                     | NM_001540 | 3315          | gb:NM_001540.2 /DB_XREF=gi:4   | 1451,9  | 8,84  | 722,22  | 17,77 | -2,01 | -1,93 | -2,1  | -729,68  | * |
| 208047_s_at  | NGFI-A binding protein 1 (EGR1 binding prot    | NM_005966 | 4664          | gb:NM_005966.1 /DB_XREF=gi:5   | 394,21  | 10,33 | 195,79  | 20,81 | -2,01 | -1,7  | -2,45 | -198,42  | * |
| 214152_at    | phosphatidylinositol glycan, class B           | AU144243  | 9488          | gb:AU144243 /DB_XREF=gi:1100   | 204,94  | 3,62  | 101,93  | 7,27  | -2,01 | -1,79 | -2,29 | -103,02  | * |
| 36742_at     | tripartite motif-containing 15                 | U34249    | 89870         | Cluster Incl. U34249:Human put | 321,47  | 0,74  | 160,14  | 1,48  | -2,01 | -1,98 | -2,04 | -161,32  | * |
| 213606_s_at  | Rho GDP dissociation inhibitor (GDI) alpha     | AI571798  | 396           | gb:AI571798 /DB_XREF=gi:4535   | 249,7   | 2,76  | 123,69  | 5,57  | -2,02 | -1,88 | -2,18 | -126,01  | * |
| 213901_x_at  | RNA binding motif protein 9                    | AW149379  | 23543         | gb:AW149379 /DB_XREF=gi:619    | 733,03  | 4,85  | 363,49  | 9,78  | -2,02 | -1,93 | -2,11 | -369,54  | * |
| 219927_at    | chromosome 14 open reading frame 111           | NM_015962 | 51077         | gb:NM_015962.1 /DB_XREF=gi:7   | 324,1   | 3,95  | 159,5   | 8,03  | -2,03 | -1,87 | -2,22 | -164,6   | * |
| 232640_at    | COMM domain containing 5                       | AK023070  | 28991         | gb:AK023070.1 /DB_XREF=gi:10   | 295,67  | 3,5   | 144,76  | 7,14  | -2,04 | -1,88 | -2,23 | -150,91  | * |
| 203865_s_at  | adenosine deaminase, RNA-specific, B1 (REI     | NM_015833 | 104           | gb:NM_015833.1 /DB_XREF=gi:7   | 214,41  | 3,71  | 104,08  | 7,65  | -2,06 | -1,83 | -2,35 | -110,32  | * |
| 213887_s_at  | polymerase (RNA) II (DNA directed) polypep     | AI554759  | 5434          | gb:AI554759 /DB_XREF=gi:4487   | 1057,93 | 11,2  | 513,91  | 23,05 | -2,06 | -1,91 | -2,23 | -544,02  | * |
| 206113_s_at  | RAB5A, member RAS oncogene family              | NM_004162 | 5868          | gb:NM_004162.1 /DB_XREF=gi:4   | 377,19  | 4,83  | 183,11  | 9,95  | -2,06 | -1,89 | -2,27 | -194,08  | * |
| 212328_at    | KIAA1102 protein                               | AB029025  | 22998         | gb:AB029025.1 /DB_XREF=gi:56   | 537,63  | 23,6  | 259,73  | 48,84 | -2,07 | -1,56 | -3,01 | -277,89  | * |
| 217973_at    | dicarbonyl/L-xylulose reductase                | NM_016286 | 51181         | gb:NM_016286.1 /DB_XREF=gi:7   | 530,59  | 10,99 | 256,83  | 22,71 | -2,07 | -1,8  | -2,43 | -273,76  | * |
| 221428_s_at  | transducin (beta)-like 1X-linked receptor 1 /  | NM_030921 | 79718         | gb:NM_030921.1 /DB_XREF=gi:1   | 2293,18 | 22,49 | 1108,38 | 46,52 | -2,07 | -1,93 | -2,23 | -1184,8  | * |
| 201320_at    | SWI/SNF related, matrix associated, actin de   | BF663402  | 6601          | gb:BF663402 /DB_XREF=gi:1193   | 267,19  | 1,96  | 128,25  | 4,08  | -2,08 | -1,98 | -2,2  | -138,94  | * |
| 222856_at    | apelin, AGTRL1 ligand                          | AK001855  | 8862          | gb:AK001855.1 /DB_XREF=gi:70   | 210,94  | 2,96  | 101,18  | 6,17  | -2,08 | -1,89 | -2,32 | -109,76  | * |
| 216897_s_at  | hypothetical protein MGC34648                  | AL035309  | 199870        | gb:AL035309.1 /DB_XREF=gi:420  | 204,88  | 2,41  | 98,3    | 5,02  | -2,08 | -1,92 | -2,28 | -106,58  | * |
| 211450_s_at  | mutS homolog 6 (E. coli)                       | D89646    | 2956          | gb:D89646.1 /DB_XREF=gi:2687   | 800,17  | 8,94  | 383,06  | 18,68 | -2,09 | -1,93 | -2,28 | -417,1   | * |
| 208055_s_at  | hect domain and RLD 4                          | NM_015601 | 26091         | gb:NM_015601.1 /DB_XREF=gi:7   | 382,66  | 5,14  | 182,35  | 10,78 | -2,1  | -1,91 | -2,33 | -200,31  | * |
| 221430_s_at  | ring finger protein 146 /// ring finger protei | NM_030963 | 81847         | gb:NM_030963.1 /DB_XREF=gi:1   | 227,68  | 3,36  | 108,58  | 7,04  | -2,1  | -1,89 | -2,35 | -119,09  | * |
| 231354_at    | POU domain, class 4, transcription factor 1    | AW510748  | 5457          | gb:AW510748 /DB_XREF=gi:714    | 222,93  | 0,17  | 105,75  | 0,37  | -2,11 | -2,1  | -2,12 | -117,18  | * |
| 241656_at    | Transcribed locus                              | AI820960  |               | gb:AI820960 /DB_XREF=gi:5440   | 371,99  | 0,59  | 176,35  | 1,25  | -2,11 | -2,08 | -2,13 | -195,63  | * |
| 203962_s_at  | nebullette                                     | NM_006393 | 10529         | gb:NM_006393.1 /DB_XREF=gi:5   | 240,7   | 5,42  | 113,71  | 11,47 | -2,12 | -1,81 | -2,55 | -126,99  | * |
| 1555201_a_at | chromosome 6 open reading frame 96             | BC012081  | 55005         | gb:BC012081.1 /DB_XREF=gi:150  | 268,32  | 5,78  | 126,4   | 12,26 | -2,12 | -1,82 | -2,53 | -141,92  | * |
| 242312_x_at  | Transcribed locus                              | AV736963  |               | gb:AV736963 /DB_XREF=gi:1085   | 281,14  | 2,78  | 132,55  | 5,9   | -2,12 | -1,97 | -2,29 | -148,59  | * |
| 1554450_s_at | hypothetical protein FLJ35954                  | BC041348  | 166968        | gb:BC041348.1 /DB_XREF=gi:27   | 280,87  | 4,51  | 132,16  | 9,59  | -2,13 | -1,89 | -2,42 | -148,71  | * |
| 217202_s_at  | glutamate-ammonia ligase (glutamine synth      | U08626    | 2752          | gb:U08626 /DB_XREF=gi:551473   | 818,16  | 8,27  | 381,47  | 17,74 | -2,14 | -1,99 | -2,33 | -436,69  | * |
| 1552789_at   | Translocation protein 1                        | NM_153039 | 7095          | gb:NM_153039.1 /DB_XREF=gi:2   | 217,75  | 3,29  | 101,69  | 7,05  | -2,14 | -1,92 | -2,42 | -116,06  | * |
| 233878_s_at  | 5'-3' exoribonuclease 2                        | BE536170  | 22803         | gb:BE536170 /DB_XREF=gi:9764   | 1294,12 | 4,64  | 604,5   | 9,93  | -2,14 | -2,08 | -2,2  | -689,62  | * |
| 216479_at    | ribosomal protein L21 /// similar to 60S ribc  | AL356414  | 89156 /// 390 | gb:AL356414 /DB_XREF=gi:1004   | 1227,6  | 1,28  | 574,76  | 2,73  | -2,14 | -2,12 | -2,15 | -652,84  | * |
| 231955_s_at  | 3-hydroxyisobutyrate dehydrogenase             | AC007130  | 11112         | gb:AC007130 /DB_XREF=gi:5001   | 1052,4  | 7,01  | 488,75  | 15,1  | -2,15 | -2,05 | -2,27 | -563,65  | * |
| 231723_at    | sorting nexin 12                               | NM_013346 | 29934         | gb:NM_013346.1 /DB_XREF=gi:7   | 265,55  | 2,35  | 122,59  | 5,09  | -2,17 | -2,02 | -2,33 | -142,96  | * |
| 1555419_a_at | N-acylsphingosine amidohydrolase (acid cer     | BC016828  | 427           | gb:BC016828.1 /DB_XREF=gi:16   | 514,99  | 5,08  | 236,16  | 11,08 | -2,18 | -2,02 | -2,37 | -278,83  | * |
| 225238_at    | musashi homolog 2 (Drosophila)                 | BF435123  | 124540        | gb:BF435123 /DB_XREF=gi:1144   | 229,01  | 3,73  | 104,17  | 8,21  | -2,2  | -1,94 | -2,53 | -124,84  | * |
| 206788_s_at  | core-binding factor, beta subunit              | AF294326  | 865           | gb:AF294326.1 /DB_XREF=gi:988  | 309,57  | 7,64  | 140,37  | 16,85 | -2,21 | -1,83 | -2,76 | -169,21  | * |
| 211473_s_at  | collagen, type IV, alpha 6                     | U04845    | 1288          | gb:U04845.1 /DB_XREF=gi:4969   | 389,87  | 3,37  | 176,39  | 7,46  | -2,21 | -2,06 | -2,38 | -213,48  | * |
| 200648_s_at  | glutamate-ammonia ligase (glutamine synth      | NM_002065 | 2752          | gb:NM_002065.1 /DB_XREF=gi:4   | 1431,51 | 12,2  | 644,96  | 27,09 | -2,22 | -2,07 | -2,39 | -786,55  | * |
| 231917_at    | G elongation factor, mitochondrial 2           | AK025314  | 84340         | gb:AK025314.1 /DB_XREF=gi:10   | 604,73  | 6,15  | 271,11  | 13,71 | -2,23 | -2,06 | -2,44 | -333,61  | * |
| 202444_s_at  | SPFH domain family, member 1                   | NM_006459 | 10613         | gb:NM_006459.1 /DB_XREF=gi:5   | 253,82  | 3,24  | 113,16  | 7,27  | -2,24 | -2,02 | -2,51 | -140,66  | * |
| 1567080_s_at | ceroid-lipofuscinosis, neuronal 6, late infant | D17218    | 54982         | gb:D17218.1 /DB_XREF=gi:5987   | 238,05  | 3,17  | 106,39  | 7,1   | -2,24 | -2,01 | -2,52 | -131,67  | * |

|              |                                                               |           |             |                               |         |       |         |       |       |       |       |          |   |
|--------------|---------------------------------------------------------------|-----------|-------------|-------------------------------|---------|-------|---------|-------|-------|-------|-------|----------|---|
| 210327_s_at  | alanine-glyoxylate aminotransferase (oxalosuccinate)          | D13368    | 189         | gb:D13368.1 /DB_XREF=gi:2194  | 275,65  | 1,55  | 122,53  | 3,49  | -2,25 | -2,15 | -2,36 | -153,12  | * |
| 230527_at    | Transcribed locus                                             | BF224444  |             | gb:BF224444 /DB_XREF=gi:1113  | 244,69  | 4,56  | 107,95  | 10,34 | -2,27 | -1,95 | -2,7  | -136,74  | * |
| 204427_s_at  | coated vesicle membrane protein                               | NM_006815 | 10959       | gb:NM_006815.1 /DB_XREF=gi:5  | 2731    | 15,13 | 1193,83 | 34,61 | -2,29 | -2,18 | -2,4  | -1537,17 | * |
| 235846_at    | Fibrinogen silencer binding protein                           | AI208616  | 25788       | gb:AI208616 /DB_XREF=gi:3770! | 383,24  | 19,21 | 167,63  | 43,92 | -2,29 | -1,58 | -4,04 | -215,61  | * |
| 1563445_x_at | cathepsin L-like 3                                            | L25629    | 1518        | gb:L25629.1 /DB_XREF=gi:40972 | 208,92  | 1,42  | 90,84   | 3,27  | -2,3  | -2,17 | -2,45 | -118,08  | * |
| 207782_s_at  | presenilin 1 (Alzheimer disease 3)                            | NM_007319 | 5663        | gb:NM_007319.1 /DB_XREF=gi:7  | 341,18  | 4,41  | 147,98  | 10,18 | -2,31 | -2,07 | -2,6  | -193,2   | * |
| 218045_x_at  | parathyrosin                                                  | NM_002824 | 5763        | gb:NM_002824.1 /DB_XREF=gi:4  | 215,19  | 1,43  | 93,33   | 3,29  | -2,31 | -2,18 | -2,45 | -121,86  | * |
| 215113_s_at  | SUMO1/sentrin/SMT3 specific protease 3                        | AK000923  | 26168       | gb:AK000923.1 /DB_XREF=gi:70  | 210,22  | 3,46  | 90,82   | 8,01  | -2,31 | -2,02 | -2,71 | -119,39  | * |
| 236444_x_at  | hypothetical LOC389328                                        | BE785577  | 389328      | gb:BE785577 /DB_XREF=gi:1020  | 290,69  | 0,17  | 125,34  | 0,39  | -2,32 | -2,31 | -2,33 | -165,35  | * |
| 203811_s_at  | DnaJ (Hsp40) homolog, subfamily B, member 1                   | NM_007034 | 11080       | gb:NM_007034.2 /DB_XREF=gi:6  | 587,69  | 8,31  | 252,46  | 19,35 | -2,33 | -2,06 | -2,67 | -335,24  | * |
| 234728_s_at  | DEAH (Asp-Glu-Ala-His) box polypeptide 35                     | AL023803  | 60625       | gb:AL023803 /DB_XREF=gi:9408  | 473,44  | 1,16  | 201,58  | 2,71  | -2,35 | -2,3  | -2,4  | -271,86  | * |
| 215707_s_at  | prion protein (p27-30) (Creutzfeldt-Jakob disease)            | AV725328  | 5621        | gb:AV725328 /DB_XREF=gi:1083  | 1080,78 | 7,31  | 456,28  | 17,31 | -2,37 | -2,23 | -2,53 | -624,5   | * |
| 224559_at    | metastasis associated lung adenocarcinoma 1                   | AF001540  | 378938      | gb:AF001540 /DB_XREF=gi:2529  | 2456,45 | 20,36 | 1037,36 | 48,21 | -2,37 | -2,2  | -2,57 | -1419,1  | * |
| 1554397_s_at | ubiquitin-conjugating enzyme E2-like 1                        | BC011011  | 55293       | gb:BC011011.1 /DB_XREF=gi:151 | 485,41  | 6,94  | 203,92  | 16,51 | -2,38 | -2,1  | -2,75 | -281,49  | * |
| 234724_x_at  | gb:AF152528.1 /DB_XREF=gi:5457102 /FEA=D                      | AF152528  |             | gb:AF152528.1 /DB_XREF=gi:545 | 206,09  | 0,15  | 85,98   | 0,35  | -2,4  | -2,38 | -2,41 | -120,11  | * |
| 1568964_x_at | sialophorin (gpL115, leukosialin, CD43)                       | BC035510  | 6693        | gb:BC035510.1 /DB_XREF=gi:231 | 594,07  | 1,76  | 246,46  | 4,25  | -2,41 | -2,34 | -2,48 | -347,61  | * |
| 1553694_a_at | phosphoinositide-3-kinase, class 2, alpha polypeptide 1       | NM_002645 | 5286        | gb:NM_002645.1 /DB_XREF=gi:4  | 269,94  | 2,92  | 111,77  | 7,05  | -2,42 | -2,18 | -2,7  | -158,17  | * |
| 220892_s_at  | phosphoserine aminotransferase 1                              | NM_021154 | 29968       | gb:NM_021154.1 /DB_XREF=gi:1  | 292,63  | 3,05  | 120,74  | 7,4   | -2,42 | -2,2  | -2,7  | -171,89  | * |
| 234726_s_at  | hypothetical protein FLJ13576                                 | AK025482  | 64418       | gb:AK025482.1 /DB_XREF=gi:104 | 252,95  | 3,39  | 103,36  | 8,29  | -2,45 | -2,16 | -2,82 | -149,59  | * |
| 214895_s_at  | a disintegrin and metalloproteinase domain 1                  | AU135154  | 102         | gb:AU135154 /DB_XREF=gi:1095  | 618,36  | 4,22  | 245,28  | 10,64 | -2,52 | -2,35 | -2,72 | -373,08  | * |
| 1553112_s_at | cyclin-dependent kinase 8                                     | NM_001260 | 1024        | gb:NM_001260.1 /DB_XREF=gi:4  | 242,22  | 3,87  | 96,22   | 9,75  | -2,52 | -2,15 | -3,03 | -146,01  | * |
| 224117_at    | hypothetical gene supported by BC001801                       | BC001801  | 284912      | gb:BC001801.1 /DB_XREF=gi:121 | 356,39  | 1,55  | 141,67  | 3,9   | -2,52 | -2,41 | -2,64 | -214,72  | * |
| 202278_s_at  | serine palmitoyltransferase, long chain base 1                | NM_006415 | 10558       | gb:NM_006415.1 /DB_XREF=gi:5  | 334,57  | 2,75  | 132     | 6,97  | -2,53 | -2,33 | -2,78 | -202,56  | * |
| 218748_s_at  | SEC10-like 1 (S. cerevisiae)                                  | NM_006544 | 10640       | gb:NM_006544.1 /DB_XREF=gi:5  | 402,63  | 4,57  | 158,9   | 11,57 | -2,53 | -2,26 | -2,88 | -243,73  | * |
| 229930_at    | hypothetical LOC150371                                        | Z83851    | 150371      | gb:Z83851 /DB_XREF=gi:544134  | 174,18  | 2,21  | 68,94   | 5,58  | -2,53 | -2,23 | -2,92 | -105,24  | * |
| 244030_at    | gb:BG390493 /DB_XREF=gi:13283941 /DB_XREF=gi:13283941         | BG390493  |             | gb:BG390493 /DB_XREF=gi:1328  | 213,08  | 2,66  | 83,18   | 6,82  | -2,56 | -2,25 | -2,96 | -129,9   | * |
| 207001_x_at  | TSC22 domain family 3                                         | NM_004089 | 1831        | gb:NM_004089.1 /DB_XREF=gi:4  | 724,16  | 3,92  | 281,69  | 10,07 | -2,57 | -2,43 | -2,73 | -442,46  | * |
| 226051_at    | selenoprotein M                                               | BF973568  | 140606      | gb:BF973568 /DB_XREF=gi:1234  | 218,7   | 5,06  | 85,22   | 12,99 | -2,57 | -2,04 | -3,43 | -133,48  | * |
| 203032_s_at  | fumarate hydratase                                            | AI363836  | 2271        | gb:AI363836 /DB_XREF=gi:4123! | 482,6   | 3,18  | 187,05  | 8,21  | -2,58 | -2,4  | -2,78 | -295,56  | * |
| 202833_s_at  | serine (or cysteine) proteinase inhibitor, clade B, member 1  | NM_000295 | 5265        | gb:NM_000295.1 /DB_XREF=gi:4  | 842,22  | 4,68  | 324,05  | 12,15 | -2,6  | -2,45 | -2,77 | -518,17  | * |
| 217139_at    | gb:AJ002428 /DB_XREF=gi:3183956 /FEA=D                        | AJ002428  |             | gb:AJ002428 /DB_XREF=gi:3183! | 247,75  | 2,07  | 95,32   | 5,39  | -2,6  | -2,38 | -2,87 | -152,43  | * |
| 222846_at    | RAB8B, member RAS oncogene family                             | AB038995  | 51762       | gb:AB038995.1 /DB_XREF=gi:72! | 201,81  | 2,46  | 76,77   | 6,47  | -2,63 | -2,31 | -3,06 | -125,04  | * |
| 213555_at    | RWD domain containing 2                                       | AL049699  | 112611      | gb:AL049699 /DB_XREF=gi:5419  | 216,16  | 0,6   | 81,52   | 1,59  | -2,65 | -2,57 | -2,74 | -134,64  | * |
| 217729_s_at  | amino-terminal enhancer of split 1                            | NM_001130 | 166         | gb:NM_001130.3 /DB_XREF=gi:6  | 268,22  | 6     | 100,19  | 16,06 | -2,68 | -2,11 | -3,64 | -168,03  | * |
| 209629_s_at  | nuclear transport factor 2-like export factor 1               | AF201942  | 55916       | gb:AF201942.1 /DB_XREF=gi:92! | 212,56  | 3,78  | 79,04   | 10,16 | -2,69 | -2,21 | -3,42 | -133,53  | * |
| 205721_at    | GDNF family receptor alpha 2                                  | U97145    | 2675        | gb:U97145.1 /DB_XREF=gi:2282! | 251,89  | 0,08  | 93,08   | 0,23  | -2,71 | -2,7  | -2,72 | -158,81  | * |
| 215329_s_at  | cell division cycle 2-like 1 (PITSLRE proteins)               | AL031282  | 984 /// 985 | gb:AL031282 /DB_XREF=gi:3860  | 294,6   | 2,81  | 107,74  | 7,68  | -2,73 | -2,44 | -3,1  | -186,85  | * |
| 206667_s_at  | secretory carrier membrane protein 1                          | AF005037  | 9522        | gb:AF005037.1 /DB_XREF=gi:22! | 370,79  | 3,12  | 134,33  | 8,6   | -2,76 | -2,49 | -3,09 | -236,46  | * |
| 223341_s_at  | short coiled-coil protein                                     | AF330205  | 60592       | gb:AF330205.1 /DB_XREF=gi:12! | 1258,69 | 8,16  | 456,44  | 22,5  | -2,76 | -2,55 | -3    | -802,25  | * |
| 221618_s_at  | TAF9-like RNA polymerase II, TATA box binding protein         | AF220509  | 51616       | gb:AF220509.1 /DB_XREF=gi:99! | 211,51  | 3,03  | 76,04   | 8,42  | -2,78 | -2,35 | -3,41 | -135,47  | * |
| 223778_at    | kinesin family member 9                                       | AF311212  | 64147       | gb:AF311212.1 /DB_XREF=gi:11! | 277,61  | 0,08  | 99,21   | 0,23  | -2,8  | -2,79 | -2,81 | -178,4   | * |
| 224407_s_at  | Mst3 and SOK1-related kinase /// Mst3 and SOK1-related kinase | AF344882  | 51765       | gb:AF344882.1 /DB_XREF=gi:13! | 240,13  | 2,22  | 85,41   | 6,25  | -2,81 | -2,51 | -3,2  | -154,71  | * |
| 215236_s_at  | phosphatidylinositol binding clathrin assembly protein        | AV721177  | 8301        | gb:AV721177 /DB_XREF=gi:1081  | 200,18  | 2,67  | 69,85   | 7,66  | -2,87 | -2,42 | -3,5  | -130,33  | * |
| 218922_s_at  | LAG1 longevity assurance homolog 4 (S. cerevisiae)            | NM_024552 | 79603       | gb:NM_024552.1 /DB_XREF=gi:1  | 205,62  | 2,16  | 71,66   | 6,21  | -2,87 | -2,51 | -3,35 | -133,96  | * |
| 222719_s_at  | platelet derived growth factor C                              | AB033831  | 56034       | gb:AB033831.1 /DB_XREF=gi:93! | 246,01  | 4,56  | 84,97   | 13,2  | -2,9  | -2,3  | -3,89 | -161,04  | * |
| 211559_s_at  | cyclin G2                                                     | L49506    | 901         | gb:L49506.1 /DB_XREF=gi:12362 | 374,78  | 2,77  | 124,06  | 8,36  | -3,02 | -2,72 | -3,4  | -250,72  | * |
| 202917_s_at  | S100 calcium binding protein A8 (calgranulin A)               | NM_002964 | 6279        | gb:NM_002964.2 /DB_XREF=gi:5  | 262,67  | 1,4   | 85,01   | 4,34  | -3,09 | -2,85 | -3,37 | -177,66  | * |
| 1555326_a_at | a disintegrin and metalloproteinase domain 1                  | AF495383  | 8754        | gb:AF495383.1 /DB_XREF=gi:21! | 553,56  | 2,3   | 177,14  | 7,19  | -3,13 | -2,93 | -3,35 | -376,43  | * |
| 203289_s_at  | chromosome 16 open reading frame 35                           | BE791629  | 8131        | gb:BE791629 /DB_XREF=gi:1021  | 201,93  | 1,18  | 63,44   | 3,76  | -3,18 | -2,9  | -3,53 | -138,49  | * |
| 211194_s_at  | tumor protein p73-like                                        | AB010153  | 8626        | gb:AB010153.1 /DB_XREF=gi:34  | 548,29  | 3,49  | 164,7   | 11,62 | -3,33 | -2,98 | -3,77 | -383,59  | * |

|             |                                             |           |        |                              |         |      |        |       |          |         |            |          |   |
|-------------|---------------------------------------------|-----------|--------|------------------------------|---------|------|--------|-------|----------|---------|------------|----------|---|
| 231128_at   | hypothetical protein MGC33846               | BE858471  | 220382 | gb:BE858471 /DB_XREF=gi:1037 | 208,96  | 0,64 | 56,81  | 2,36  | -3,68    | -3,44   | -3,95      | -152,16  | * |
| 204426_at   | coated vesicle membrane protein             | NM_006815 | 10959  | gb:NM_006815.1 /DB_XREF=gi:5 | 1454,88 | 2,82 | 375,36 | 10,94 | -3,88    | -3,7    | -4,07      | -1079,52 | * |
| 226987_at   | RNA binding motif protein 15B               | W68720    | 29890  | gb:W68720 /DB_XREF=gi:13776  | 503,68  | 7,5  | 85,3   | 44,31 | -5,91    | -3,18   | -40,59     | -418,39  | * |
| 239928_at   | hypothetical protein FLJ12975               | AI733451  | 79867  | gb:AI733451 /DB_XREF=gi:5054 | 241,23  | 1,63 | 35,47  | 11,08 | -6,8     | -4,49   | -13,98     | -205,76  | * |
| 1554947_at  | acetyl-Coenzyme A acetyltransferase 1 (ace  | BC010942  | 38     | gb:BC010942.1 /DB_XREF=gi:15 | 210,25  | 0,27 | 17,12  | 3,31  | -12,28   | -9,32   | -17,99     | -193,13  | * |
| 241245_at   | Transcribed locus, weakly similar to XP_496 | AV647470  |        | gb:AV647470 /DB_XREF=gi:9868 | 3319,72 | 0,08 | 98,86  | 2,54  | -33,58   | -32,22  | -35,06     | -3220,86 | * |
| 1566900_at  | TGFB-induced factor (TALE family homeobo    | AL832409  | 7050   | gb:AL832409.1 /DB_XREF=gi:21 | 1822,73 | 1,04 | 21     | 90,18 | -86,82   | -10,76  | -100000000 | -1801,73 | * |
| 234380_x_at | hypothetical LOC389253                      | M18679    | 389253 | gb:M18679 /DB_XREF=gi:33737  | 2548,57 | 0,14 | 21,99  | 16,66 | -115,9   | -51,6   | -100000000 | -2526,58 | * |
| 207412_x_at | gb:NM_001808.1 /DB_XREF=gi:4502772 /Gl      | NM_001808 |        | gb:NM_001808.1 /DB_XREF=gi:4 | 5888,33 | 0,02 | 4,04   | 22,57 | -1458,05 | -143,06 | -100000000 | -5884,29 | * |
| 228770_at   | G protein-coupled receptor 146              | BE645027  | 115330 | gb:BE645027 /DB_XREF=gi:9969 | 4977,54 | 0    | 1      | 3,88  | -4977,54 | -673,96 | -100000000 | -4976,54 | * |
